# Supplementary material for: Creation of molecular complexities via a new Cu-catalyzed cascade reaction: a direct access to novel 2,2′-spirobiindole derivatives
Source: Royal Society of Chemistry journal article supplement (doi:10.1039/c4cc08911a), 2014-11-20
Supplement: c4cc08911a3.pdf [file c4cc08911a3.pdf]

## Copies of spectra

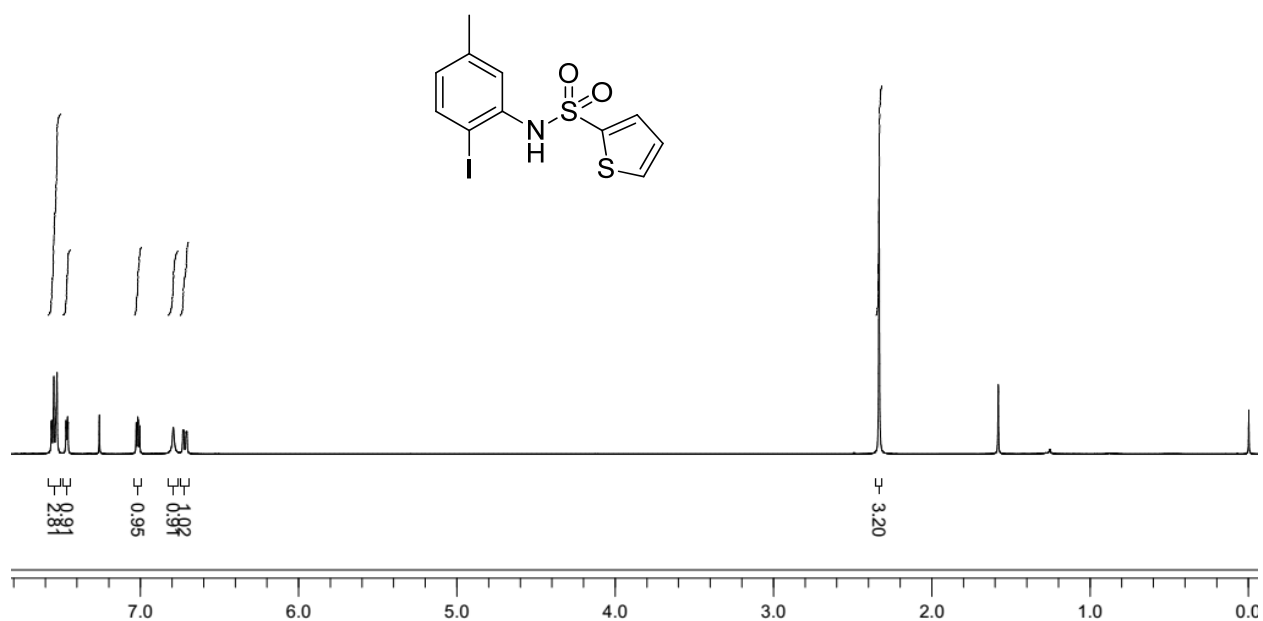

$^1\text{H}$  NMR (Varian, 400 MHz) spectrum of compound **1S1** in  $\text{CDCl}_3$

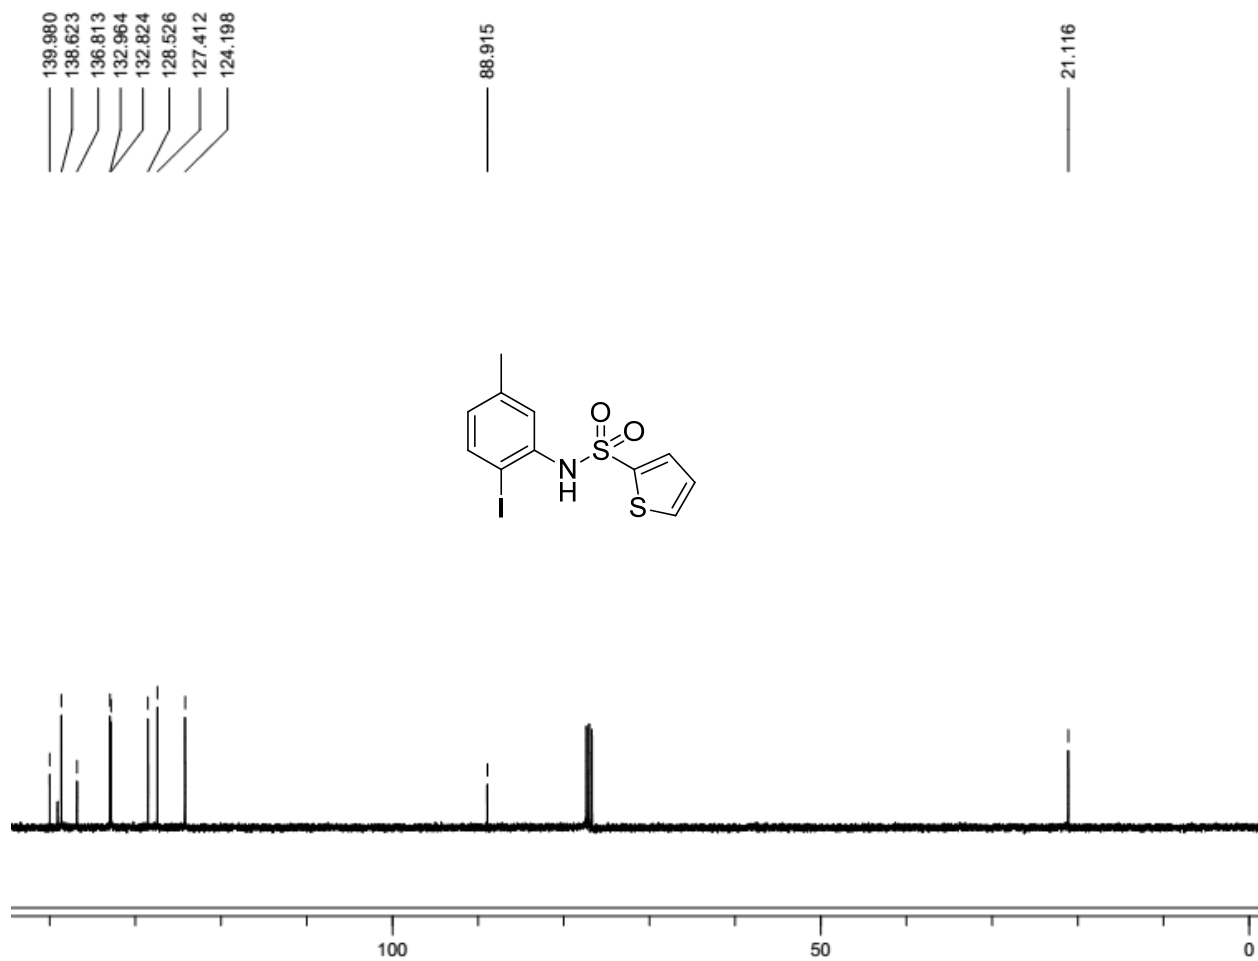

<sup>13</sup>C NMR spectrum (Varian, 100 MHz) of compound **1S1** in CDCl<sub>3</sub>

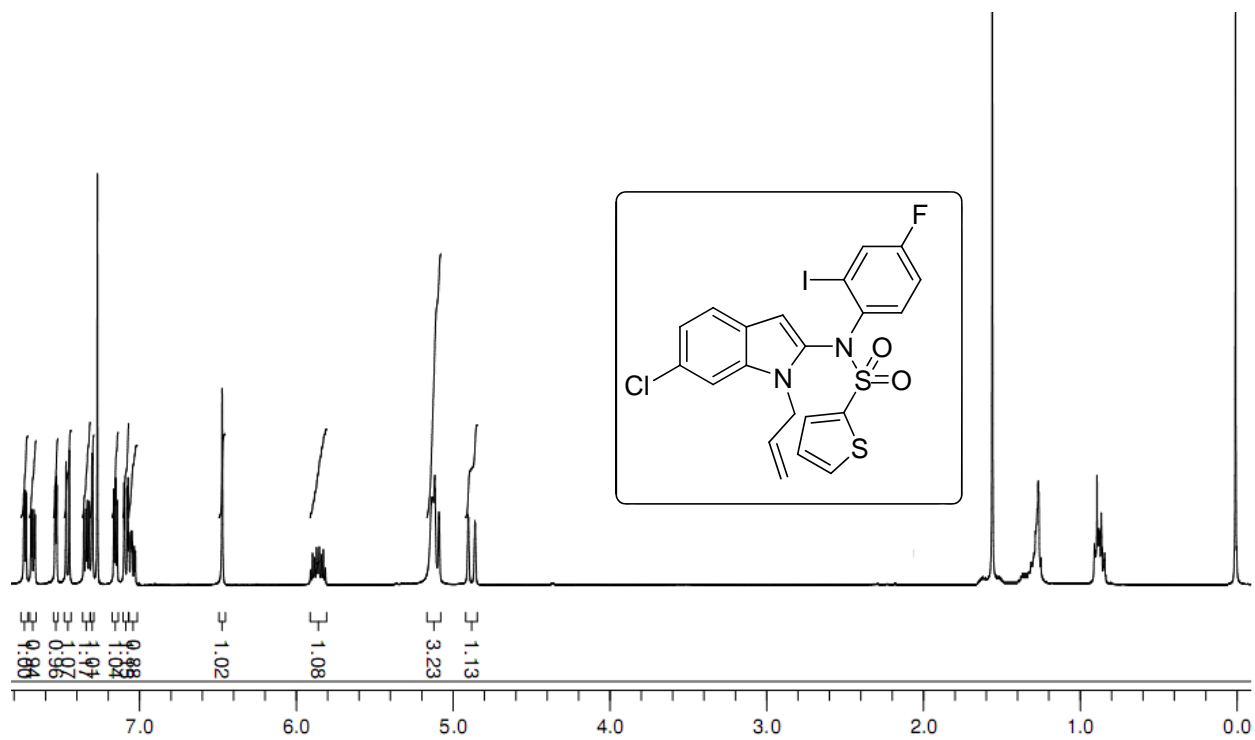

<sup>1</sup>H NMR (Varian, 400 MHz) spectrum of compound **1S4r** in CDCl<sub>3</sub>

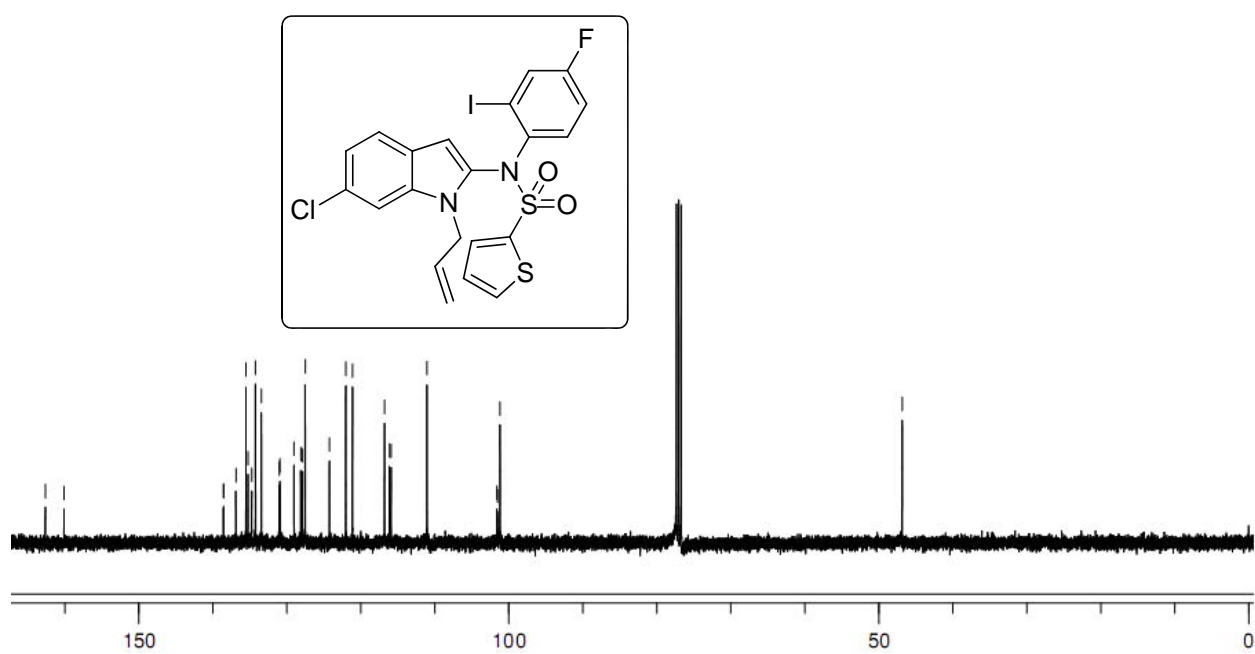

<sup>13</sup>C NMR spectrum (Varian, 100 MHz) of compound **1S4r** in CDCl<sub>3</sub>

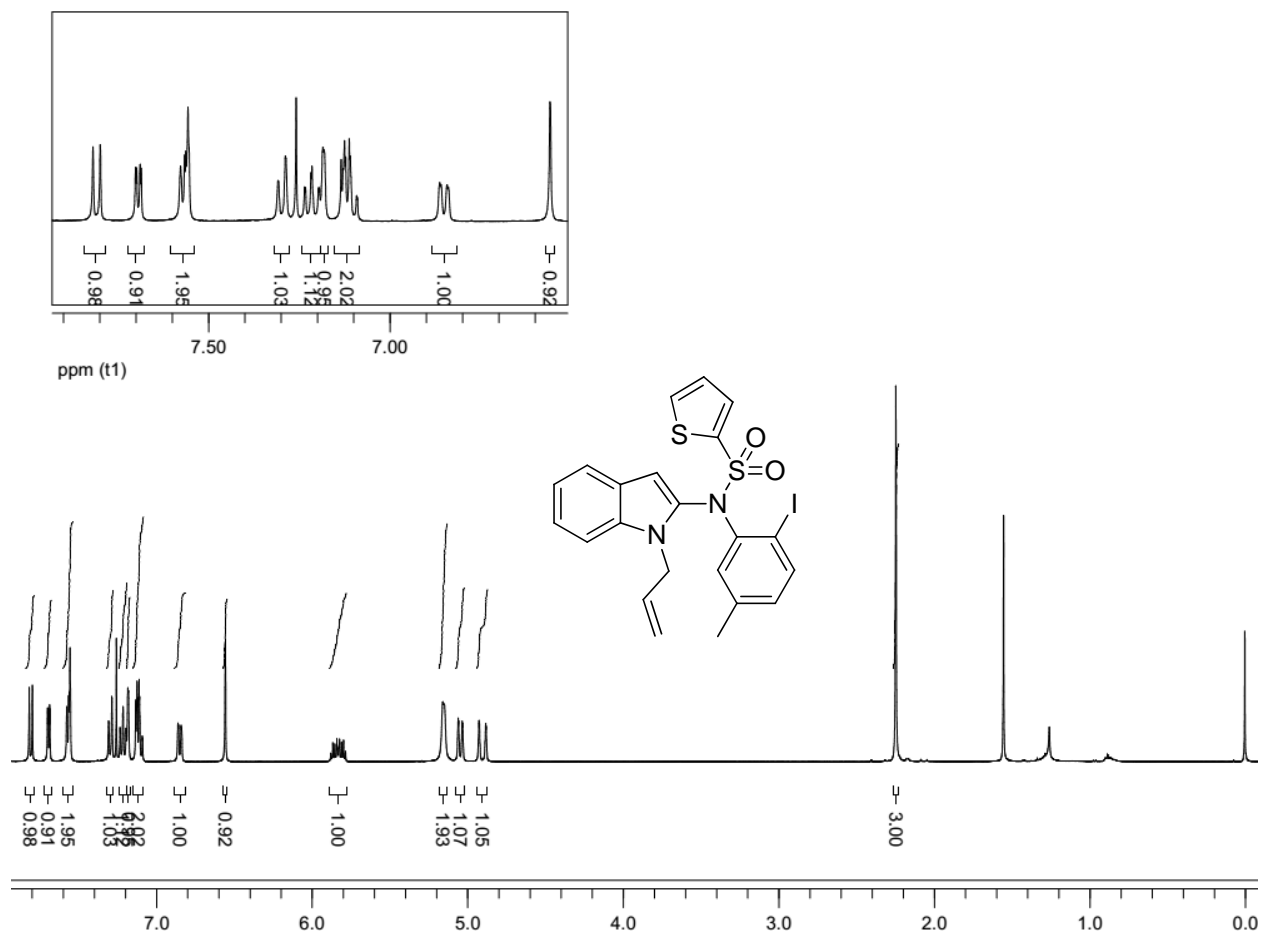

$^1\text{H}$  NMR (Varian, 400 MHz) spectrum of compound **1S4s** in  $\text{CDCl}_3$

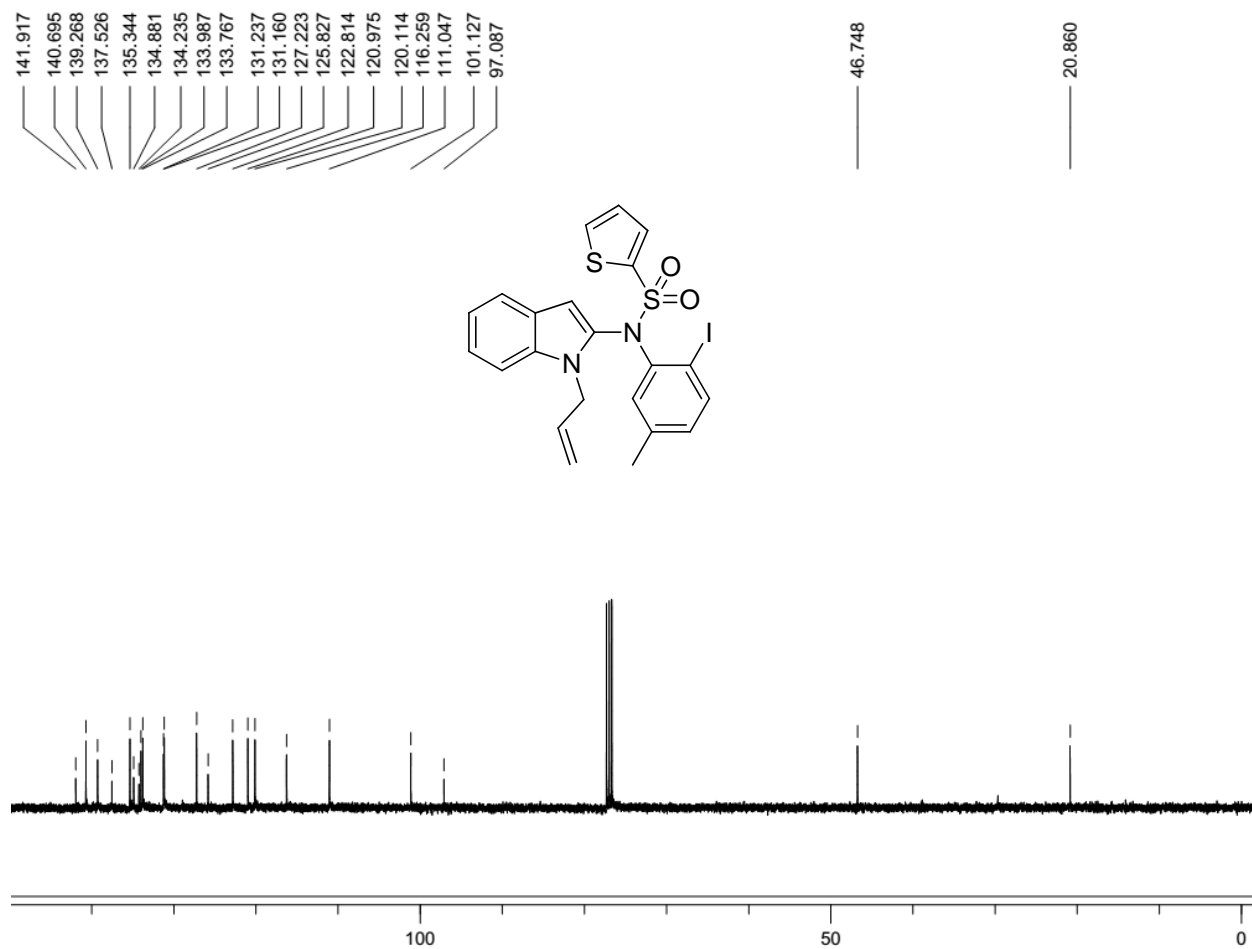

$^{13}\text{C}$  NMR spectrum (Varian, 100 MHz) of compound **1S4s** in  $\text{CDCl}_3$

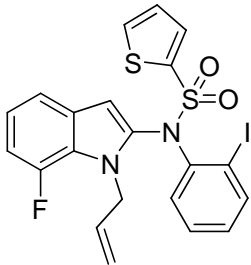

<sup>1</sup>H NMR (Varian, 400 MHz) spectrum of compound **1S4t** in CDCl<sub>3</sub>

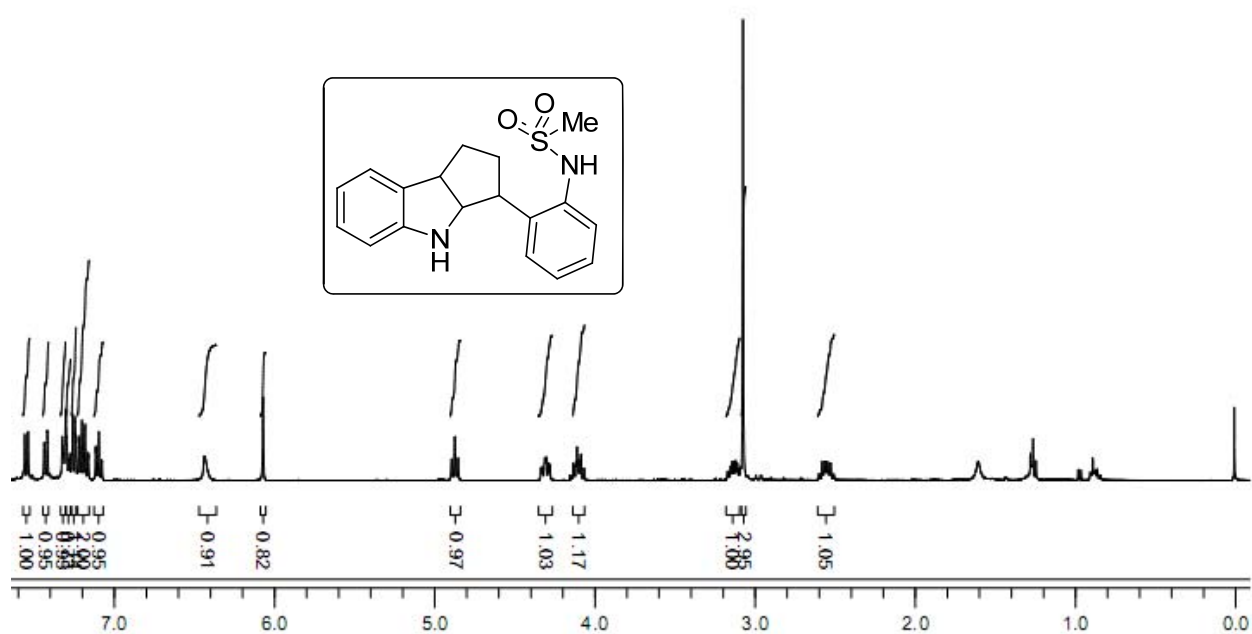

$^1\text{H}$  NMR (Varian, 400 MHz) spectrum of compound **1a** in  $\text{CDCl}_3$

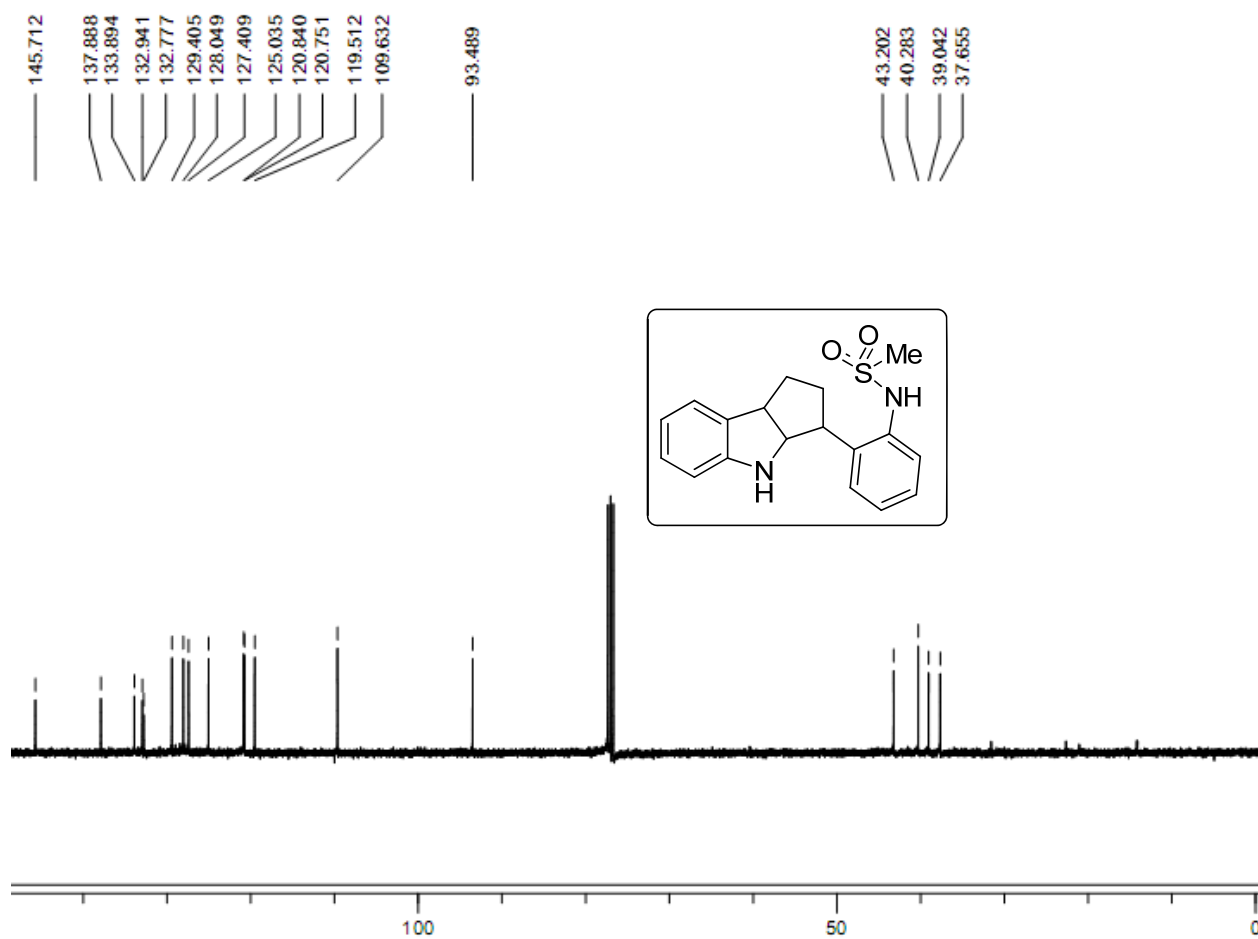

<sup>13</sup>C NMR spectrum (Varian, 100 MHz) of compound **1a** in CDCl<sub>3</sub>



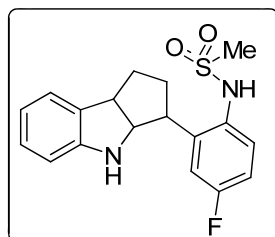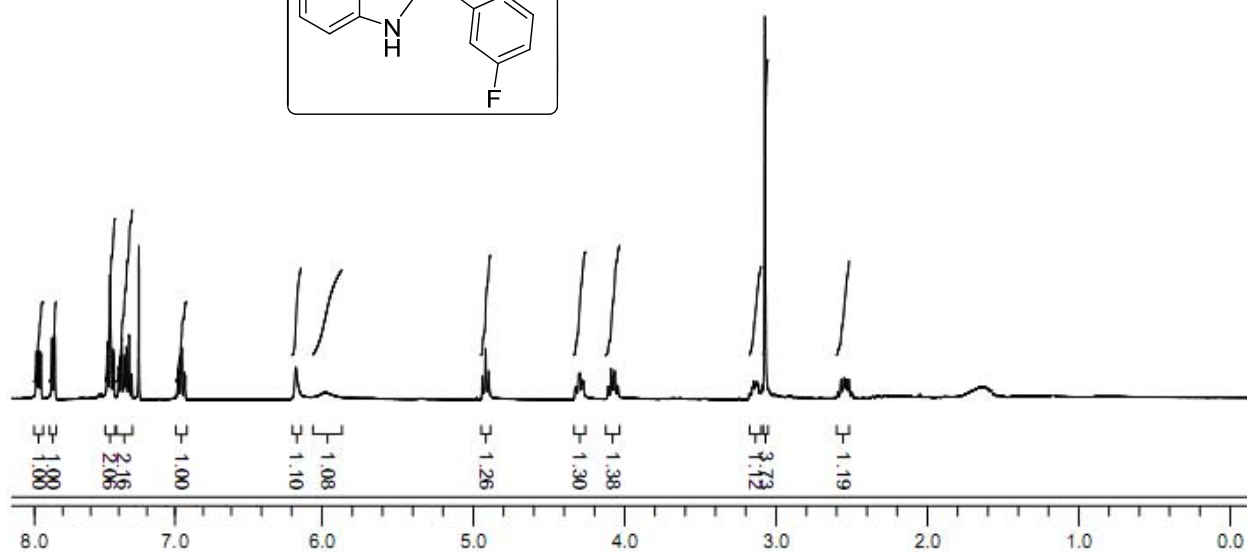

$^1\text{H}$  NMR (Varian, 400 MHz) spectrum of compound **1f** in  $\text{CDCl}_3$

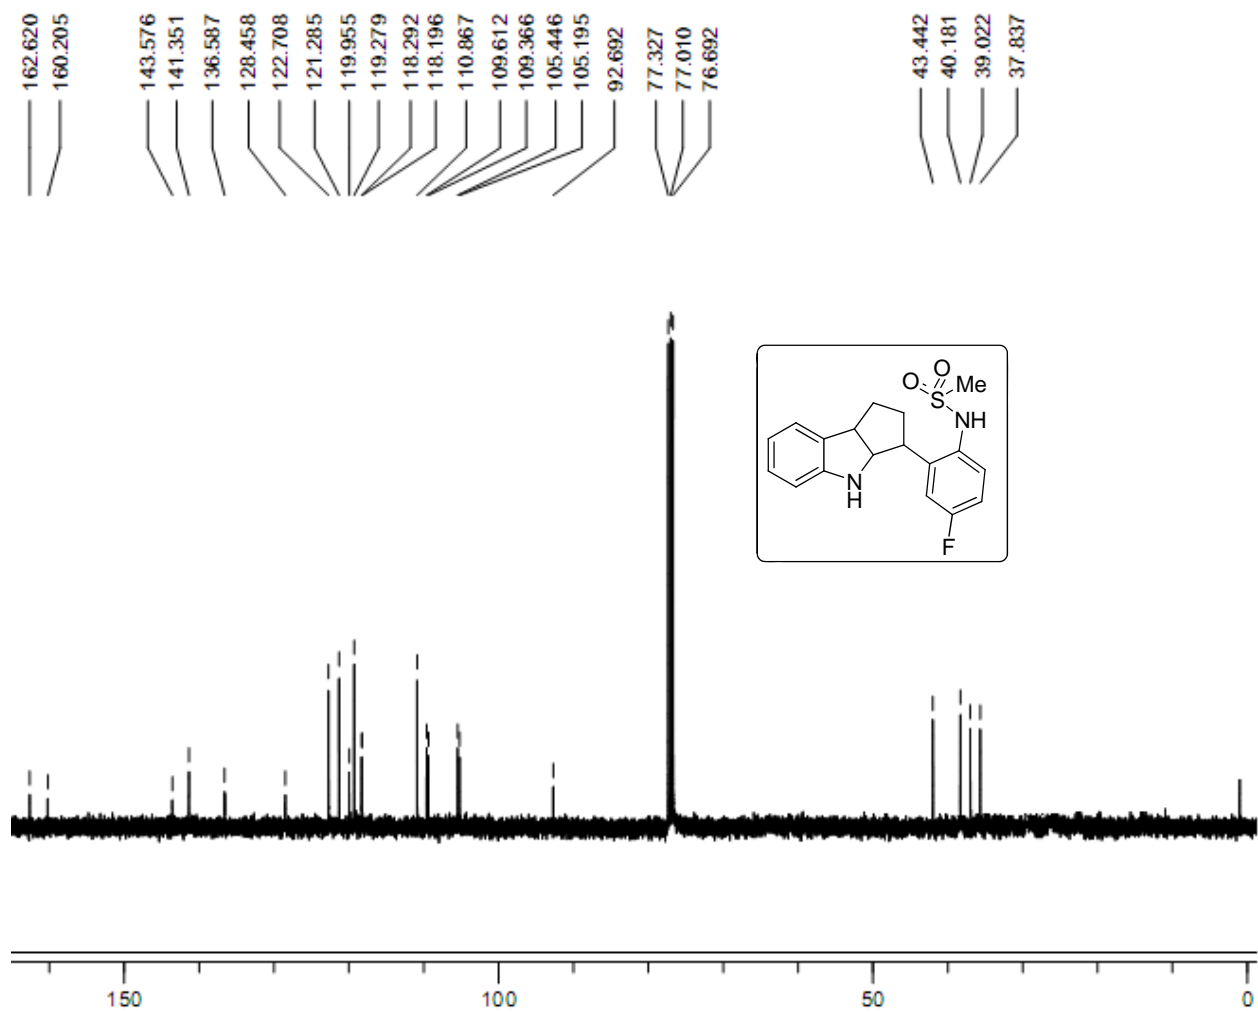

<sup>13</sup>C NMR spectrum (Varian, 100 MHz) of compound **1f** in CDCl<sub>3</sub>

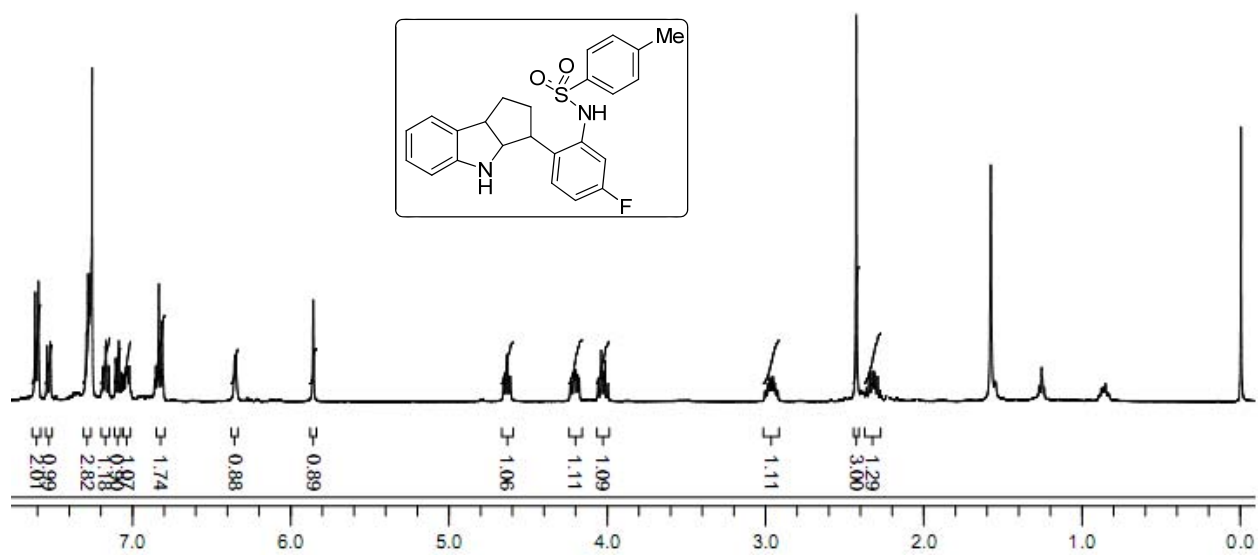

$^1\text{H}$  NMR (Varian, 400 MHz) spectrum of compound **1g** in  $\text{CDCl}_3$

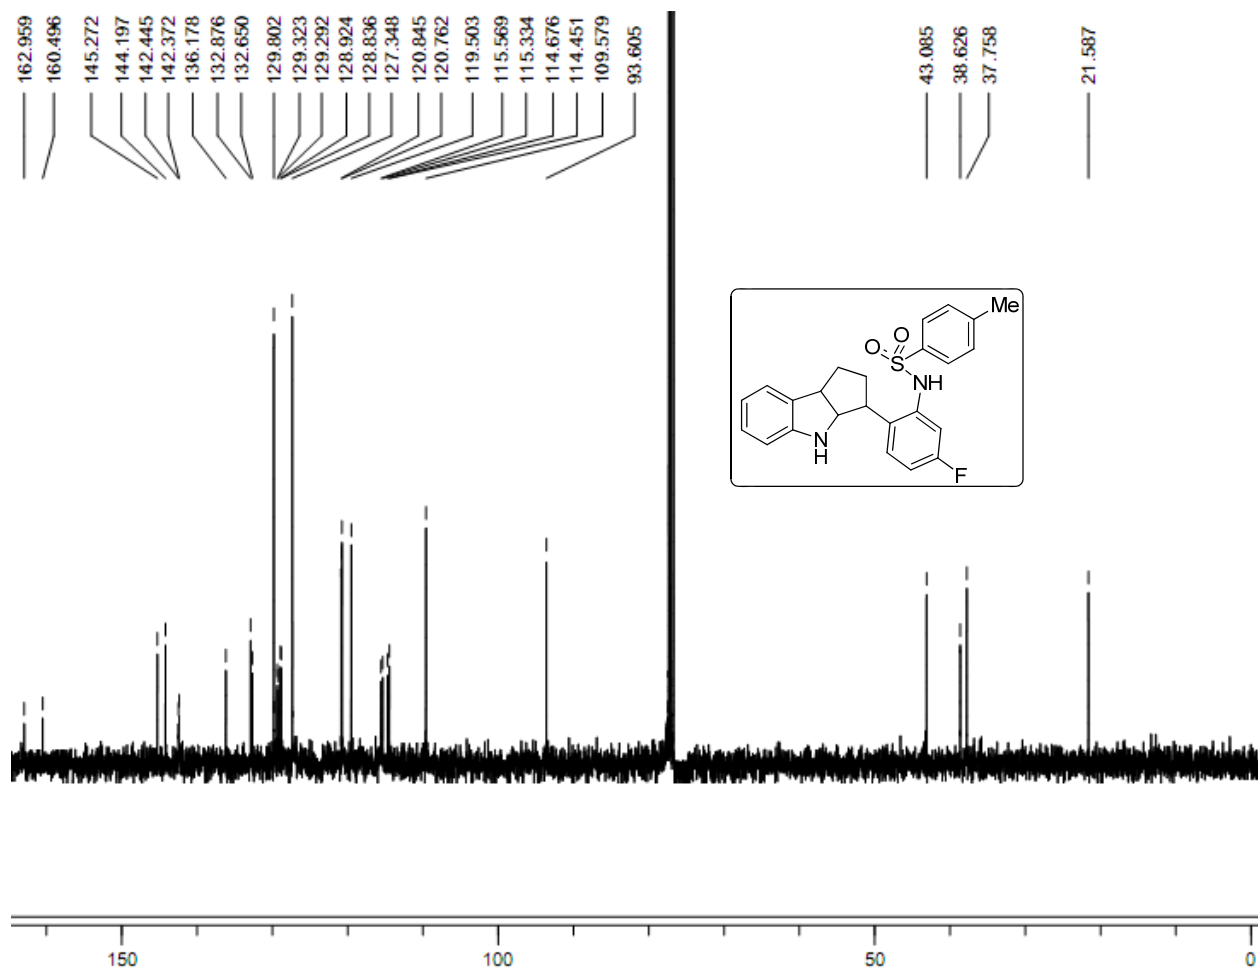

<sup>13</sup>C NMR spectrum (Varian, 100 MHz) of compound **1g** in CDCl<sub>3</sub>

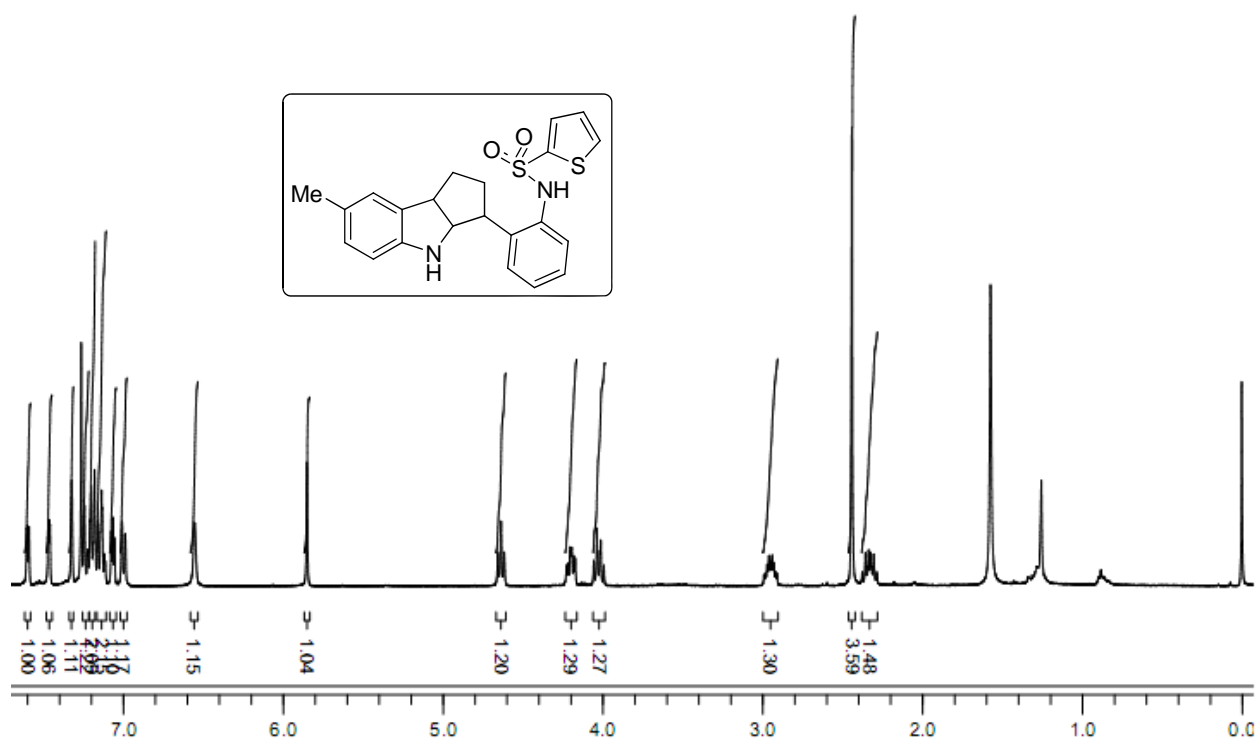

<sup>1</sup>H NMR (Varian, 400 MHz) spectrum of compound **1e** in CDCl<sub>3</sub>

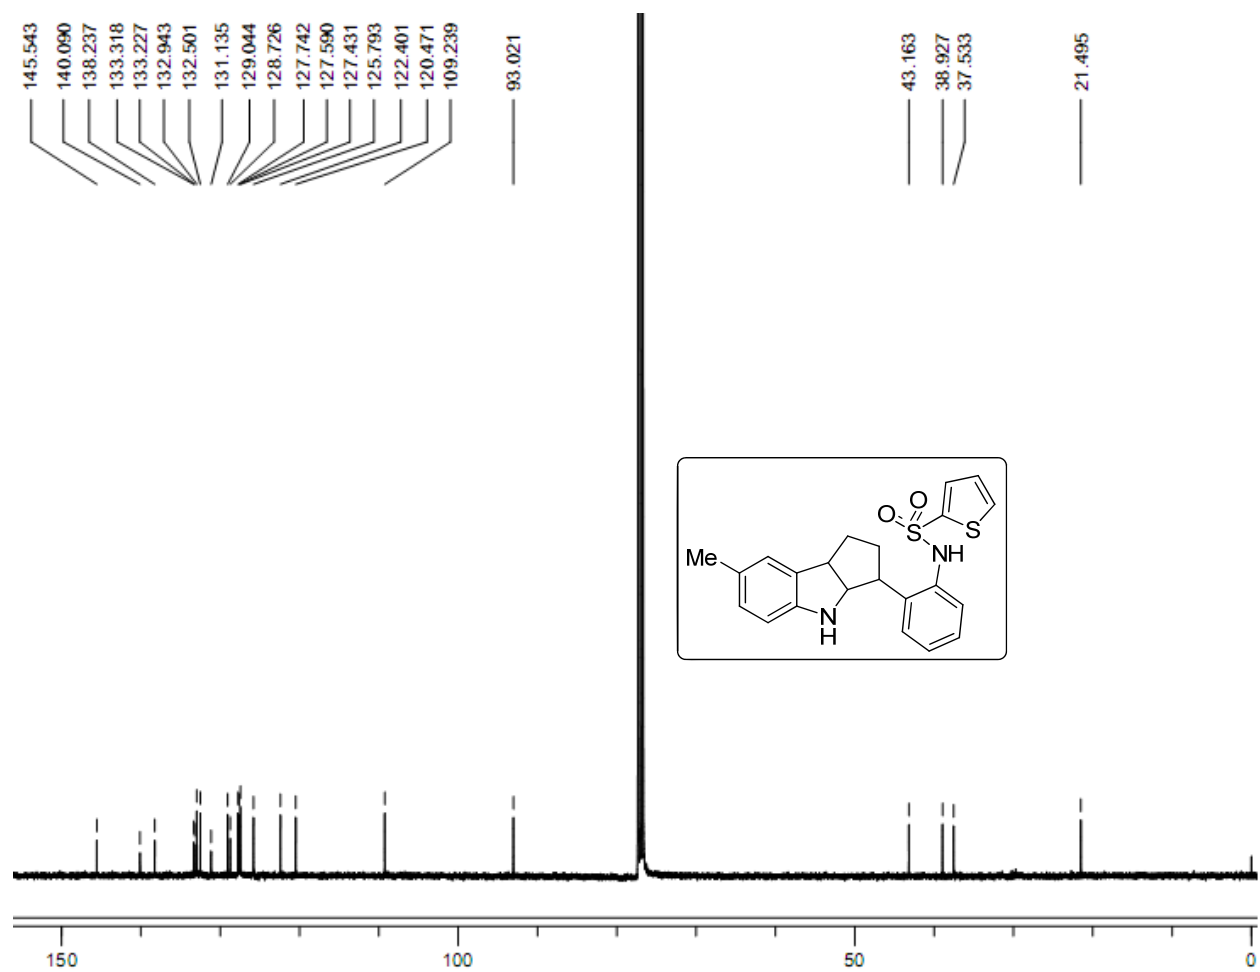

<sup>13</sup>C NMR spectrum (Varian, 100 MHz) of compound **1e** in CDCl<sub>3</sub>

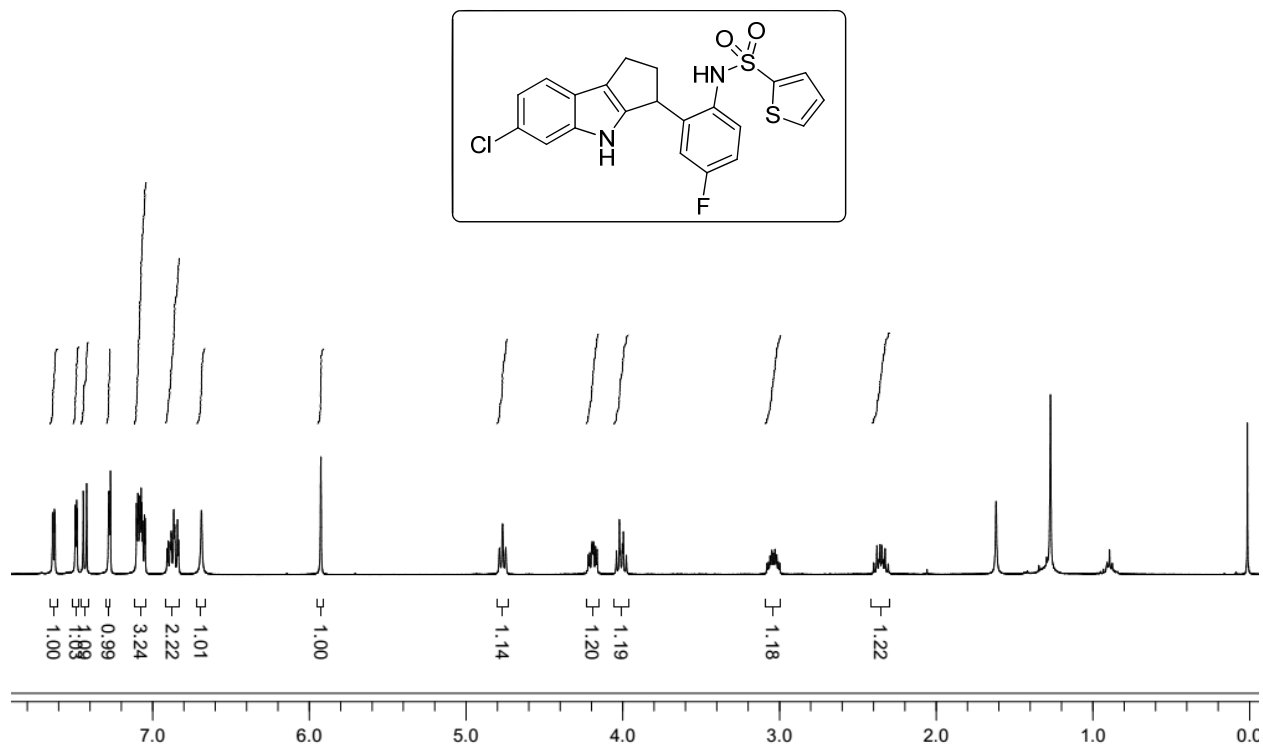

$^1\text{H}$  NMR (Varian, 400 MHz) spectrum of compound **1r** in  $\text{CDCl}_3$

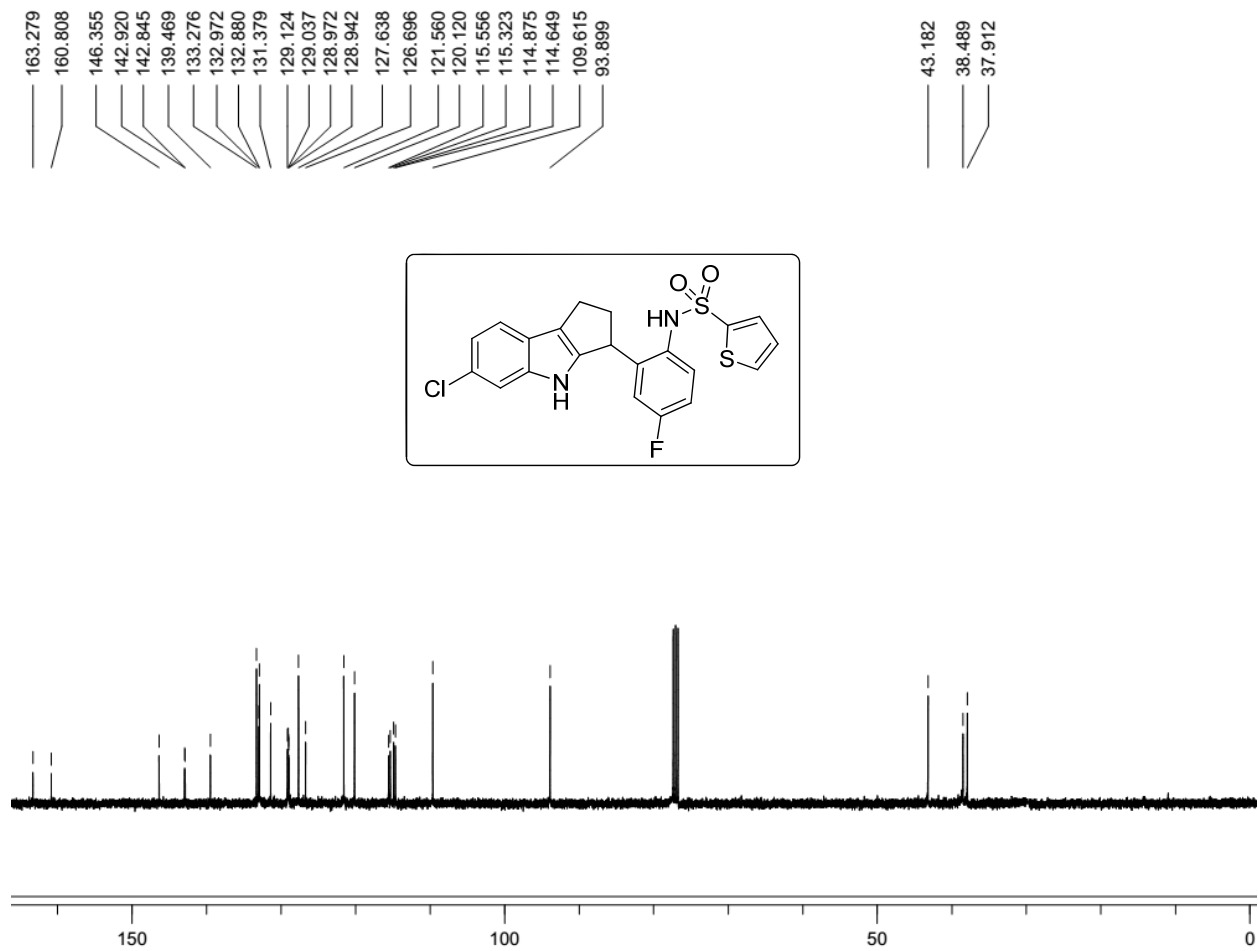

$^{13}\text{C}$  NMR spectrum (Varian, 100 MHz) of compound **1r** in  $\text{CDCl}_3$



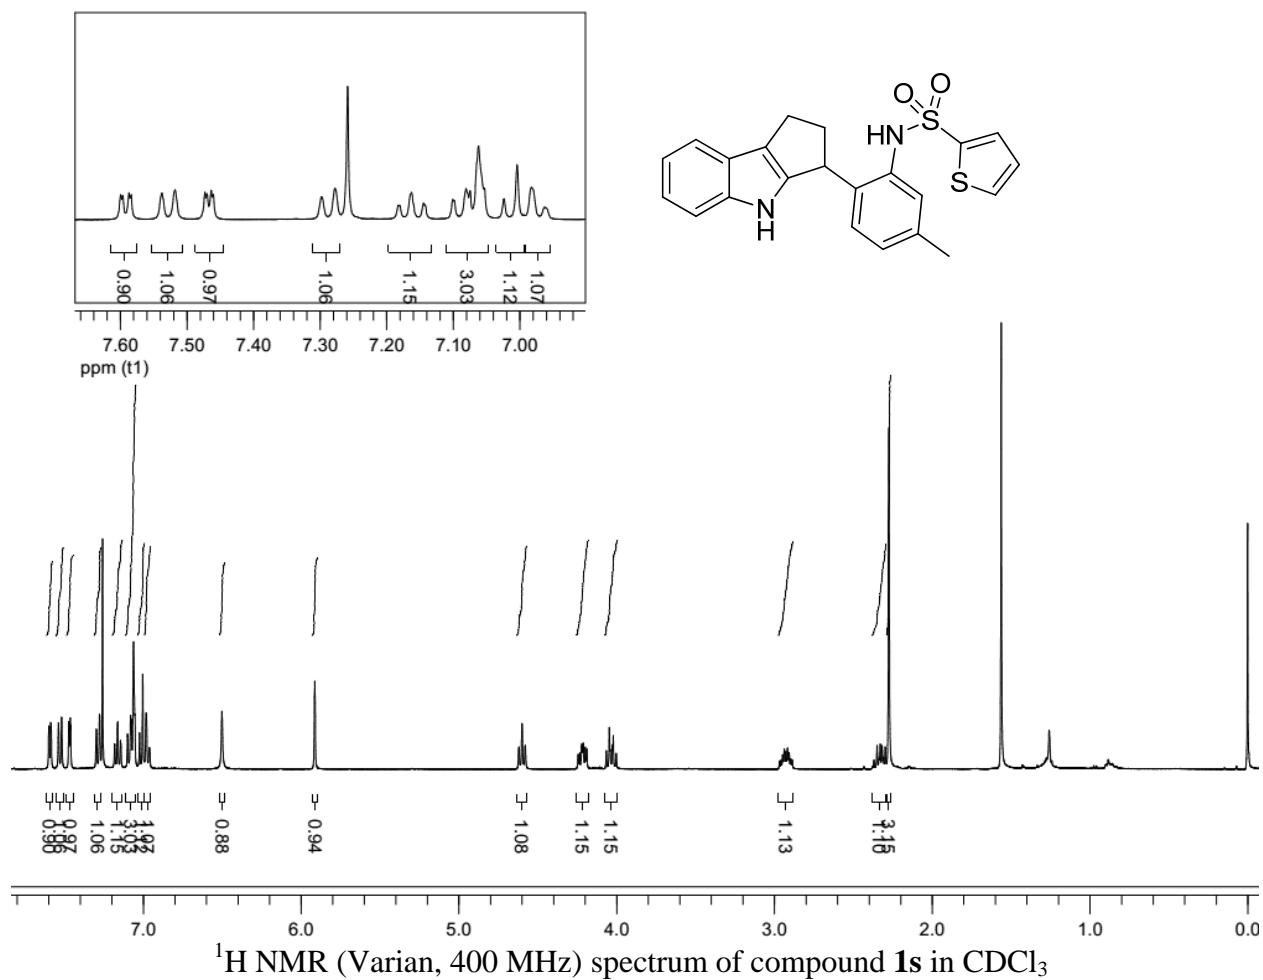

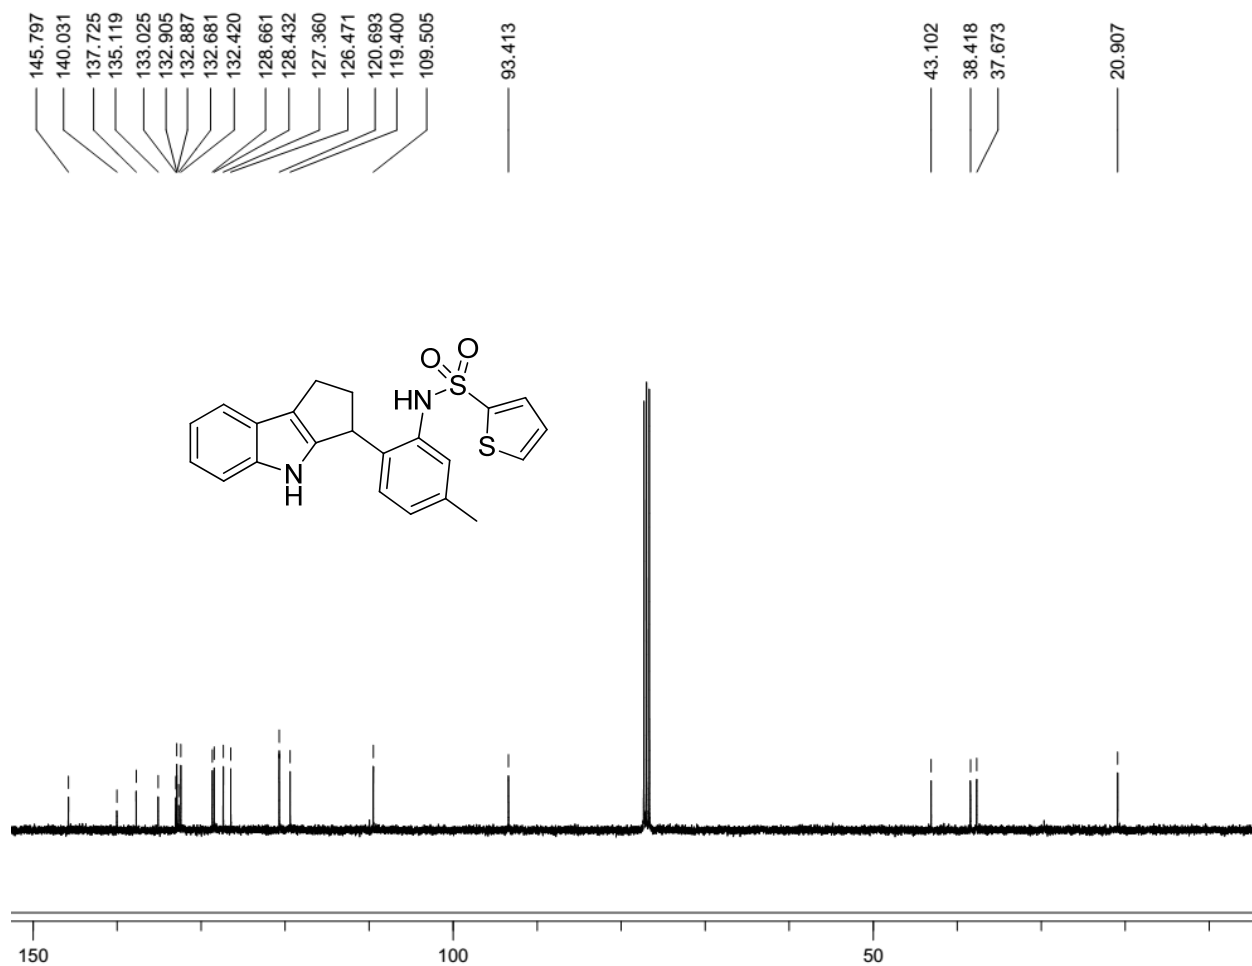

<sup>13</sup>C NMR spectrum (Varian, 100 MHz) of compound **1s** in CDCl<sub>3</sub>

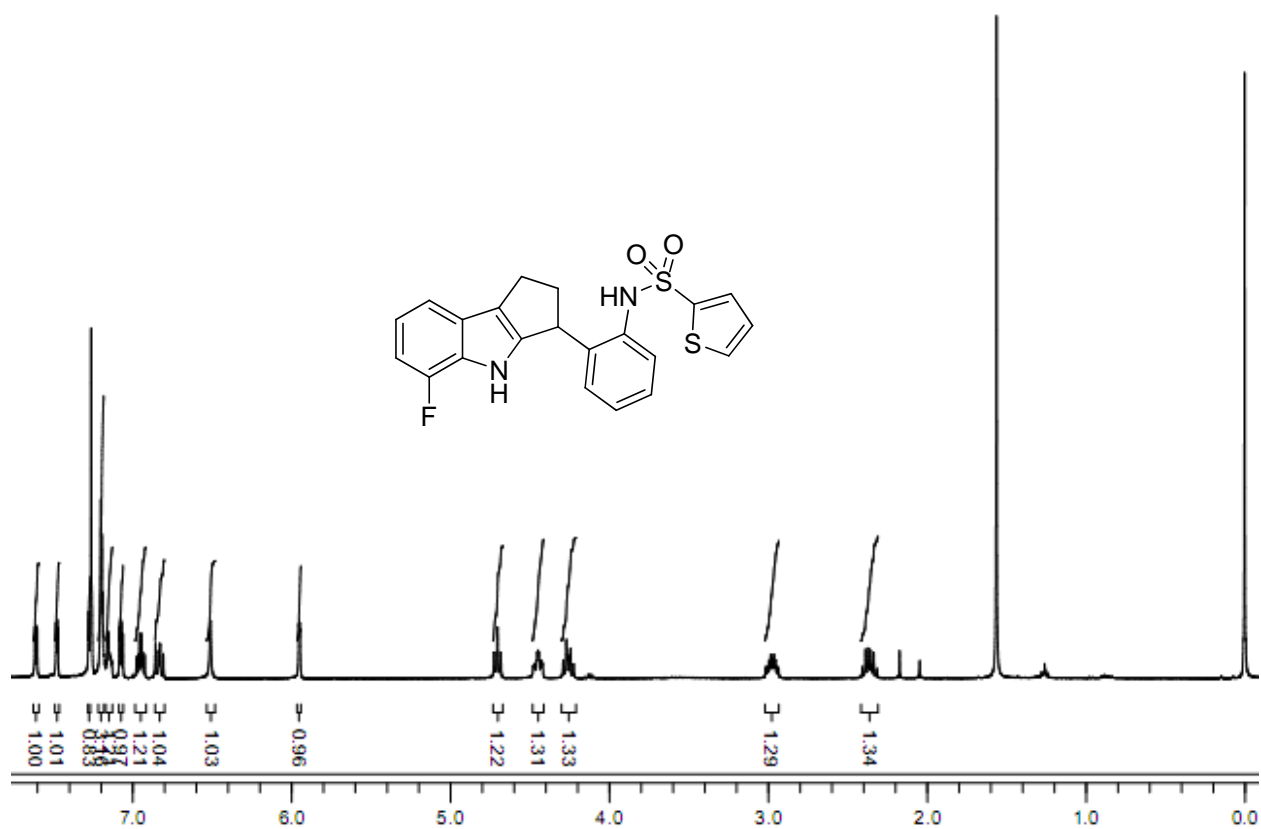

<sup>1</sup>H NMR (Varian, 400 MHz) spectrum of compound **1t** in CDCl<sub>3</sub>

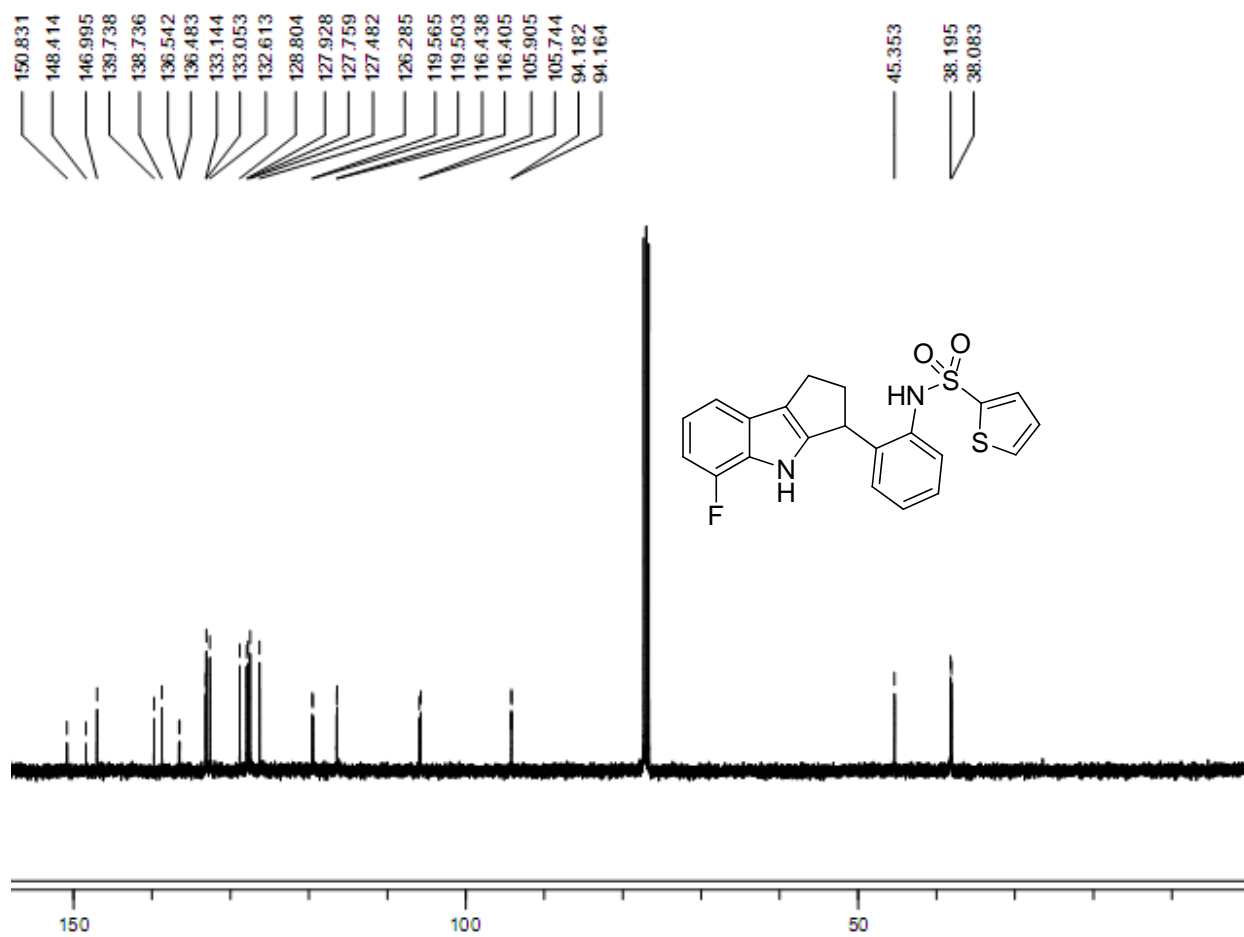

<sup>13</sup>C NMR spectrum (Varian, 100 MHz) of compound **1t** in CDCl<sub>3</sub>

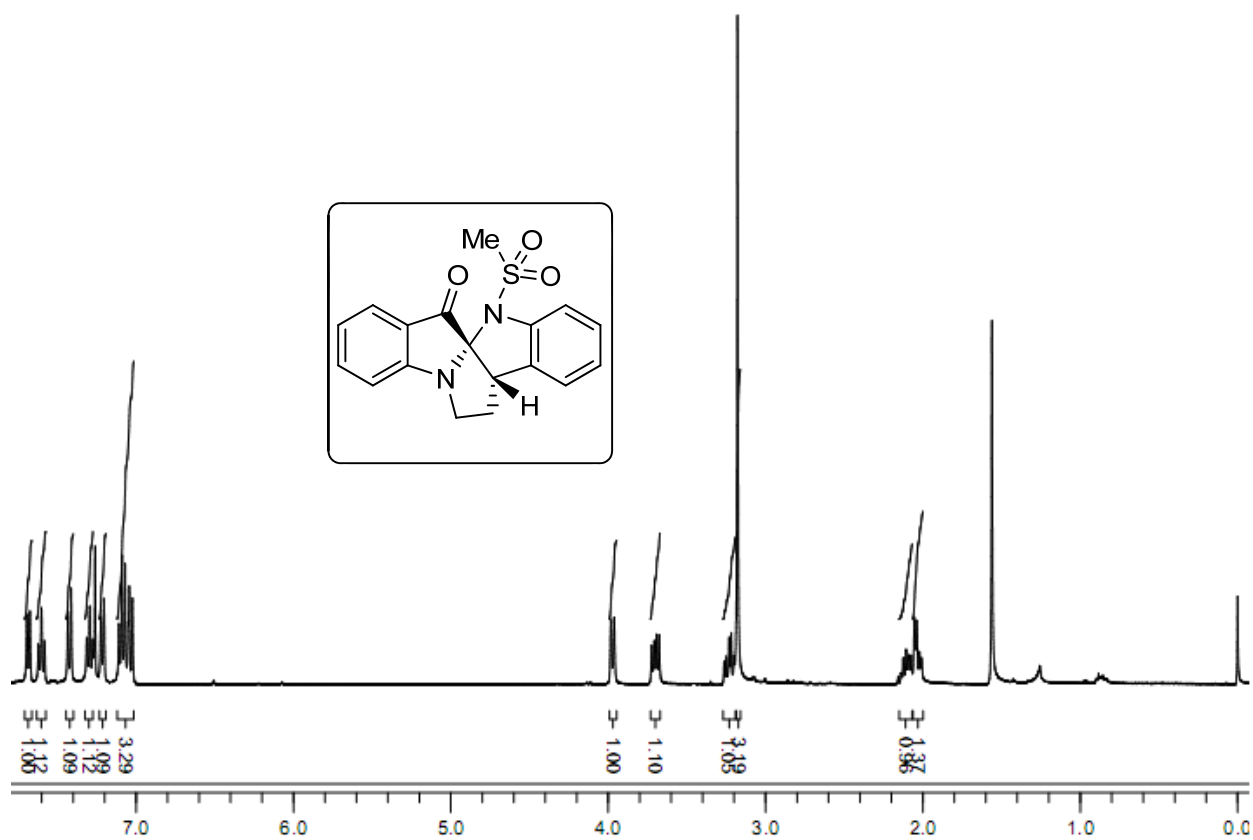

$^1\text{H}$  NMR (Varian, 400 MHz) spectrum of compound **2a** in  $\text{CDCl}_3$

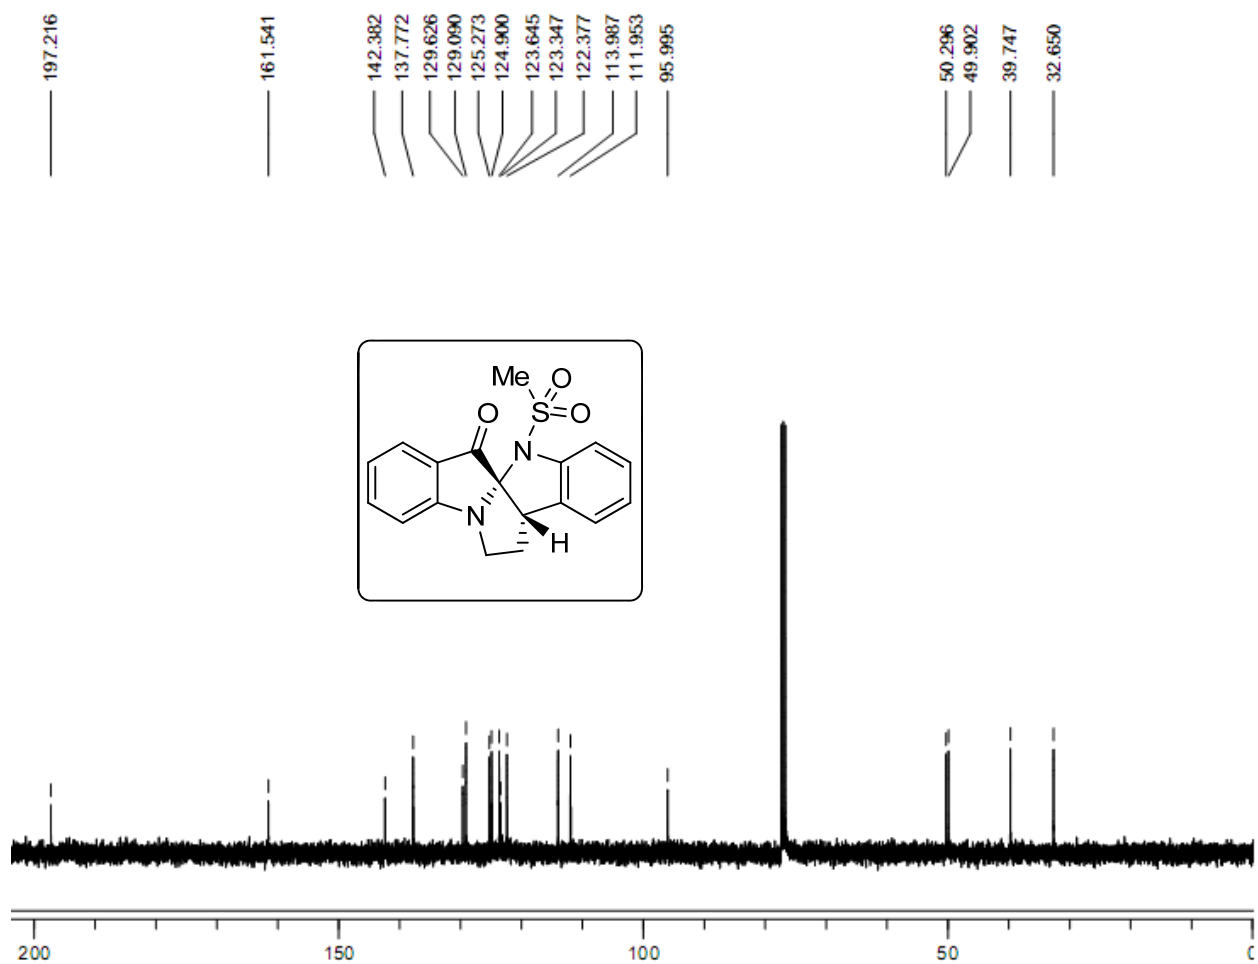

$^{13}\text{C}$  NMR spectrum (Varian, 100 MHz) of compound **2a** in  $\text{CDCl}_3$

# HPLC of compound 2a

CPRI @ DRILS  
HPLC ANALYSIS REPORT

Inj Date : Tue, 27. May. 2014 Acq Operator: SHASHIDHAR  
Sample Name : ILS-BPS-3-180 Vial 14  
A.R Number : CM14E012 ->Inj. Vol. : 5µL  
Acq. Method : D:\chem32\1\DATA\270514-API 2014-05-27 18-19-52\API ->  
Analysis Method : D:\CHEM32\_002\1\METHODS\API DTV.M  
Method Info : Column: X-Terra C-18 250\*4.6mm, 5µm  
Mobile phase: A) 5mm Ammonium Acetate in water B) ACN  
T/%B:0/20,3/20,12/95,23/95,25/20,30/20  
Flow:1.0ml/min Diluent: ACN:WATER(50:50)

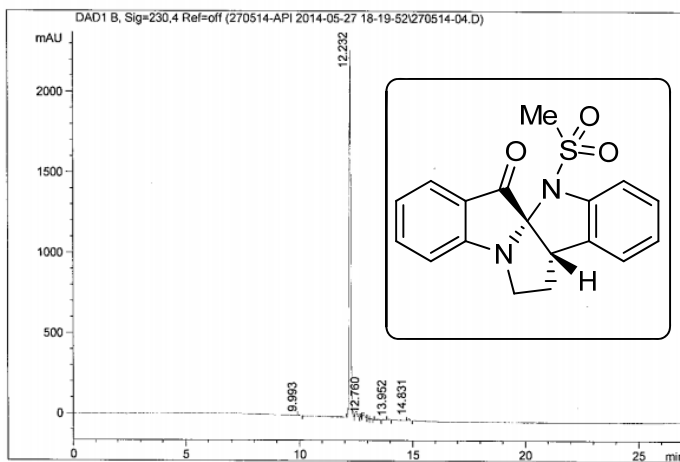

Signal 1: DAD1 B, Sig=230,4 Ref=off

| Peak # | RT [min] | Area      | Area % |
|--------|----------|-----------|--------|
| 1      | 9.993    | 14.972    | 0.131  |
| 2      | 12.232   | 10840.727 | 96.465 |
| 3      | 12.501   | 186.677   | 1.635  |
| 4      | 12.760   | 20.405    | 0.179  |
| 5      | 12.833   | 206.185   | 1.806  |
| 6      | 13.027   | 27.736    | 0.243  |
| 7      | 13.154   | 21.844    | 0.191  |
| 8      | 13.465   | 25.585    | 0.224  |
| 9      | 13.952   | 15.275    | 0.134  |
| 10     | 14.831   | 56.059    | 0.491  |

|             |               |               |                      |               |              |                 |              |
|-------------|---------------|---------------|----------------------|---------------|--------------|-----------------|--------------|
| Sample Name | ILS-BPS-3-180 | Position      | Vial 37              | Sample type   |              | Instrument Name | Instrument 1 |
| User Name   |               | Inj Vol       | 0.5                  | Data Filename | 260514M020.d | ACQ Method      | test.m       |
| AR NO :     | MM14E025      | Acquired Time | 5/26/2014 4:03:29 PM |               |              |                 |              |

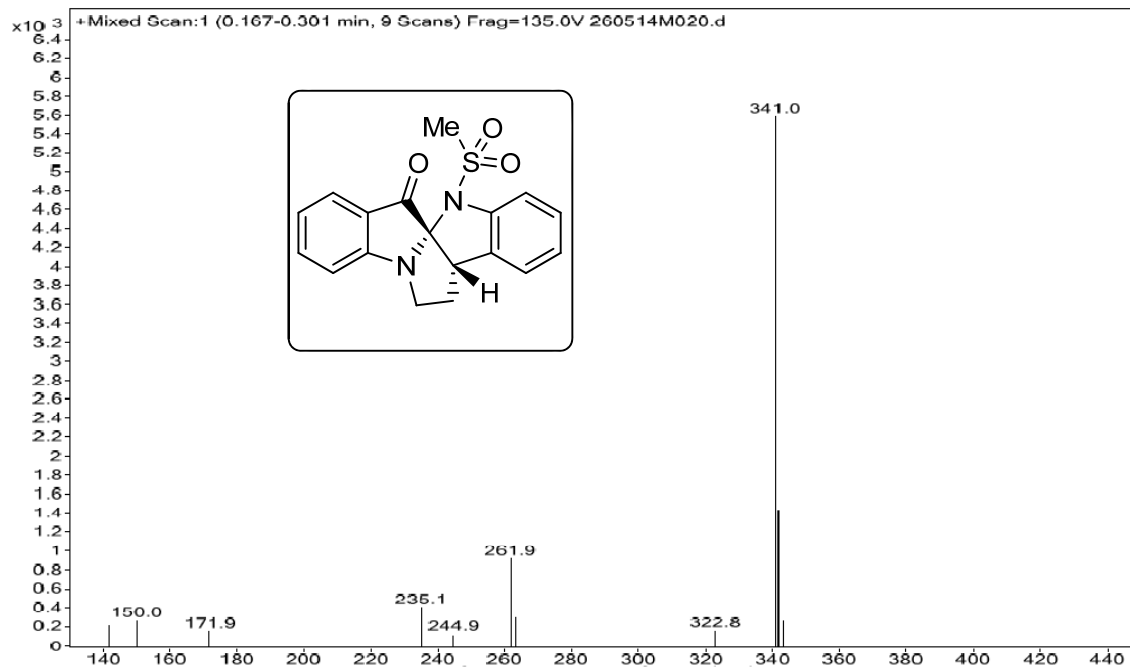

Mass spectra of compound **2a**



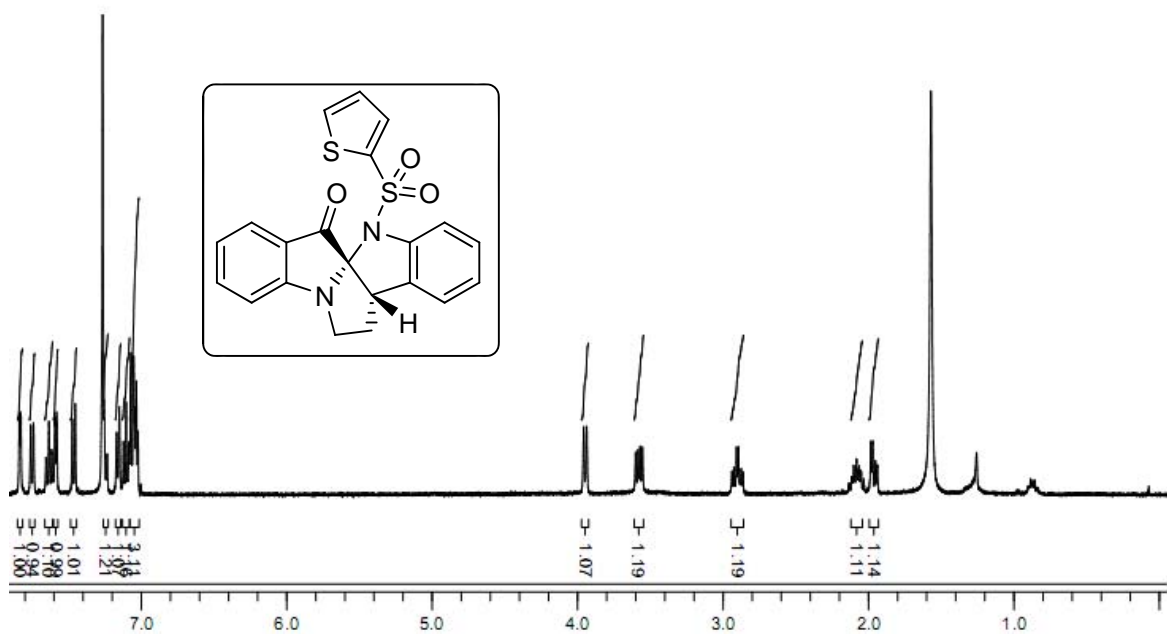

$^1\text{H}$  NMR (Varian, 400 MHz) spectrum of compound **2b** in  $\text{CDCl}_3$

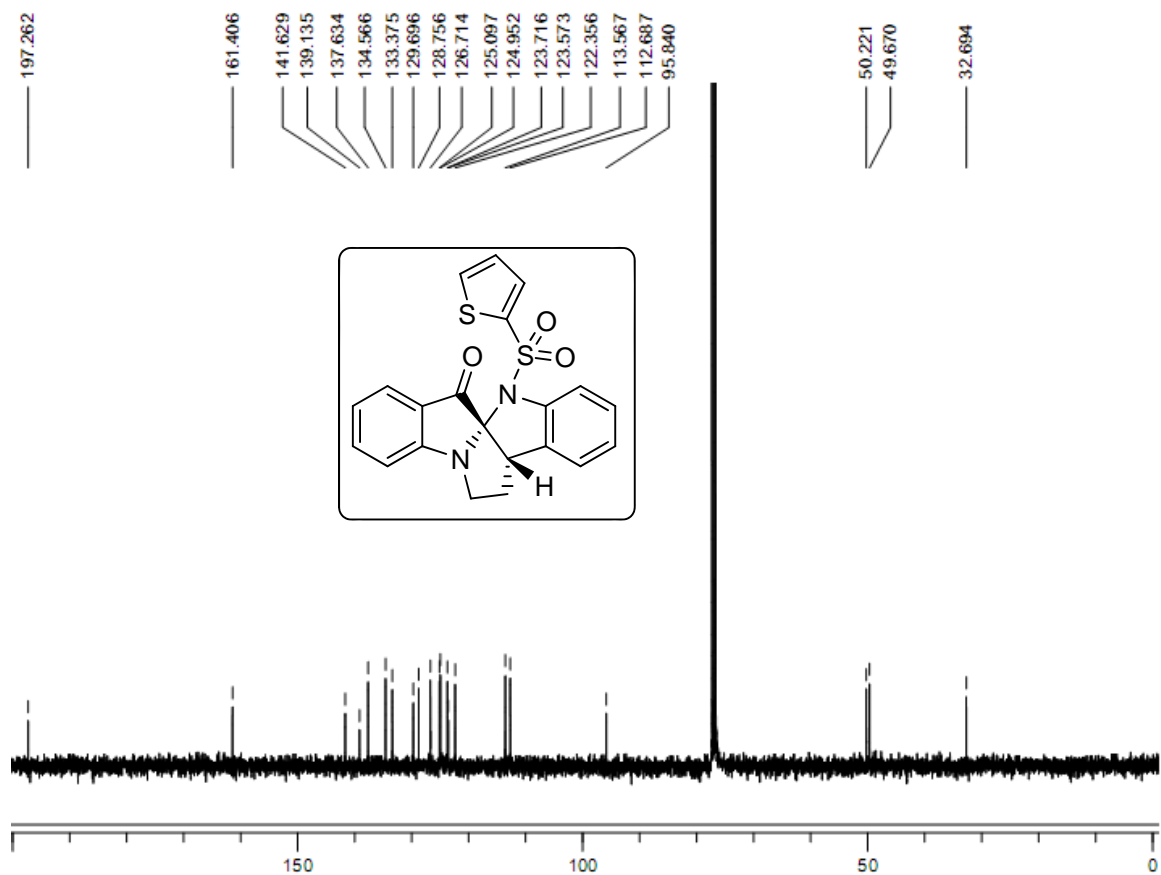

$^{13}\text{C}$  NMR spectrum (Varian, 100 MHz) of compound **2b** in  $\text{CDCl}_3$

ILS-BPS-CN in CDCl3  
DEPT EXPT.  
File No:20130718\_53

Sample Name:

Data Collected on:  
wormhole-vnmrs400  
Archive directory:

Sample directory:

FidFile: DEPT

Pulse Sequence: DEPT  
Solvent: cdcl3  
Data collected on: Jul 18 2013

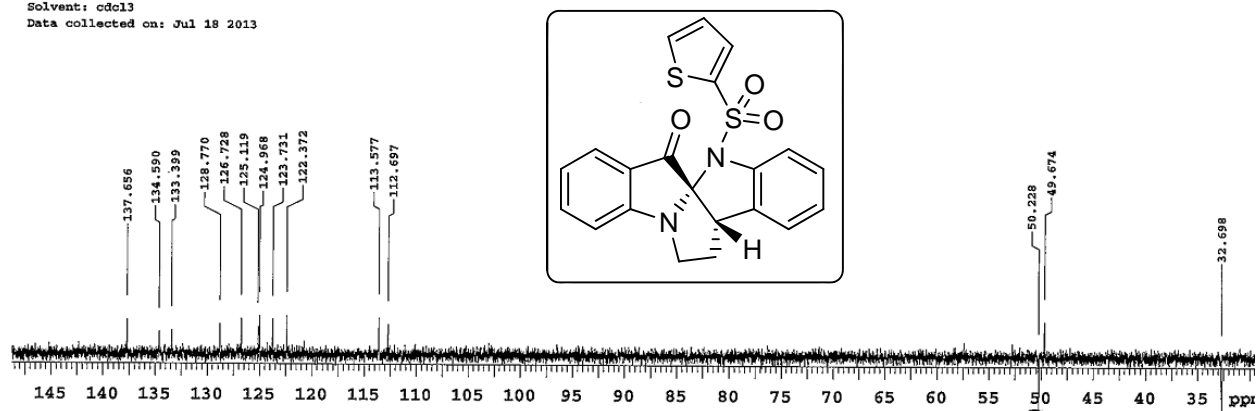

DEPT of compound **2b**

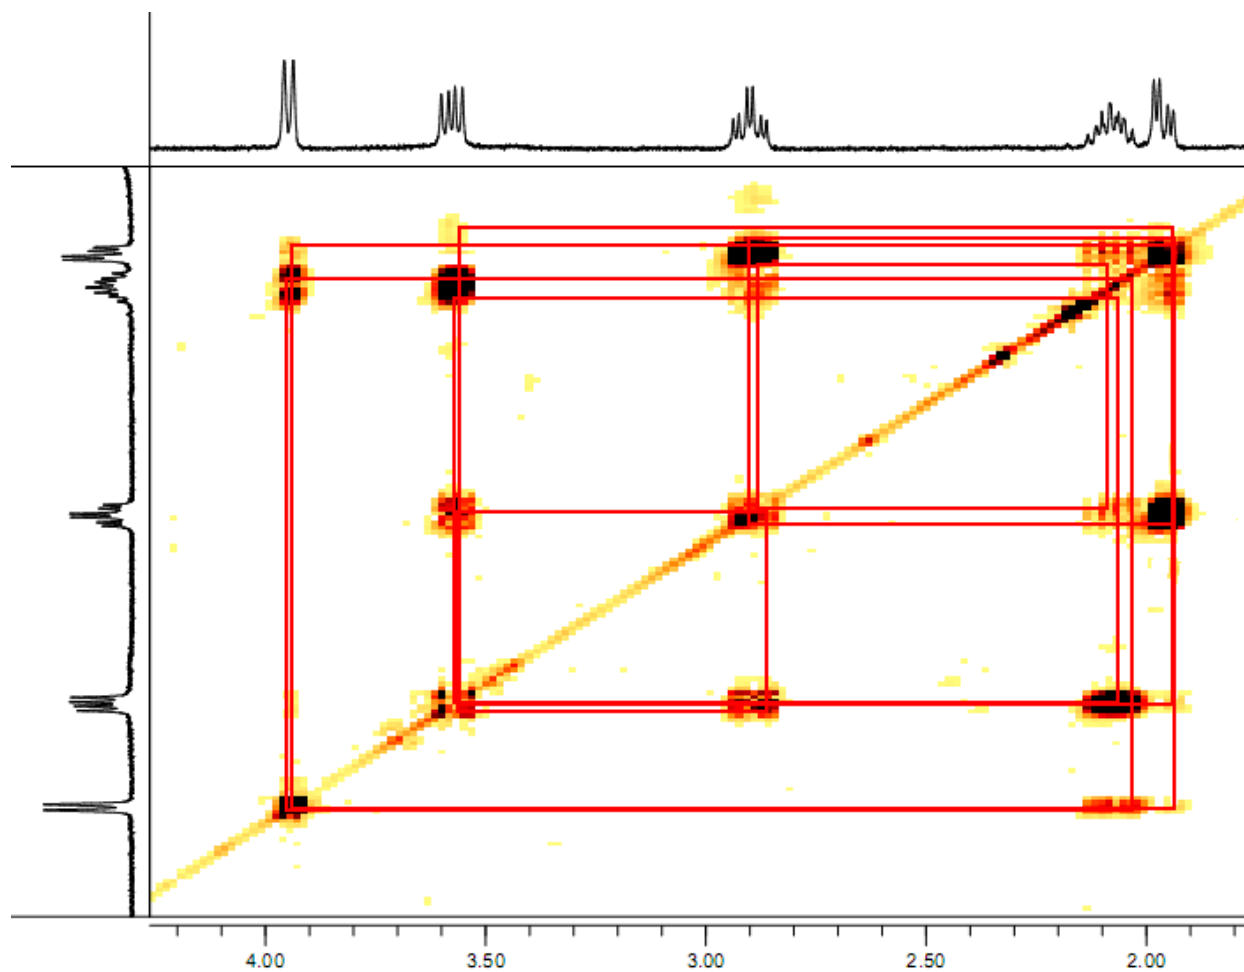

$^1\text{H}$ - $^1\text{H}$  COSY of compound **2b**

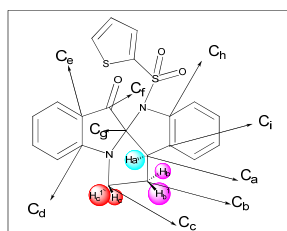

Data collected on: Jul 18 2023

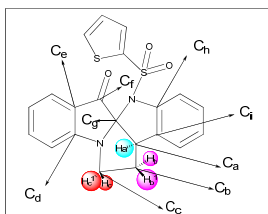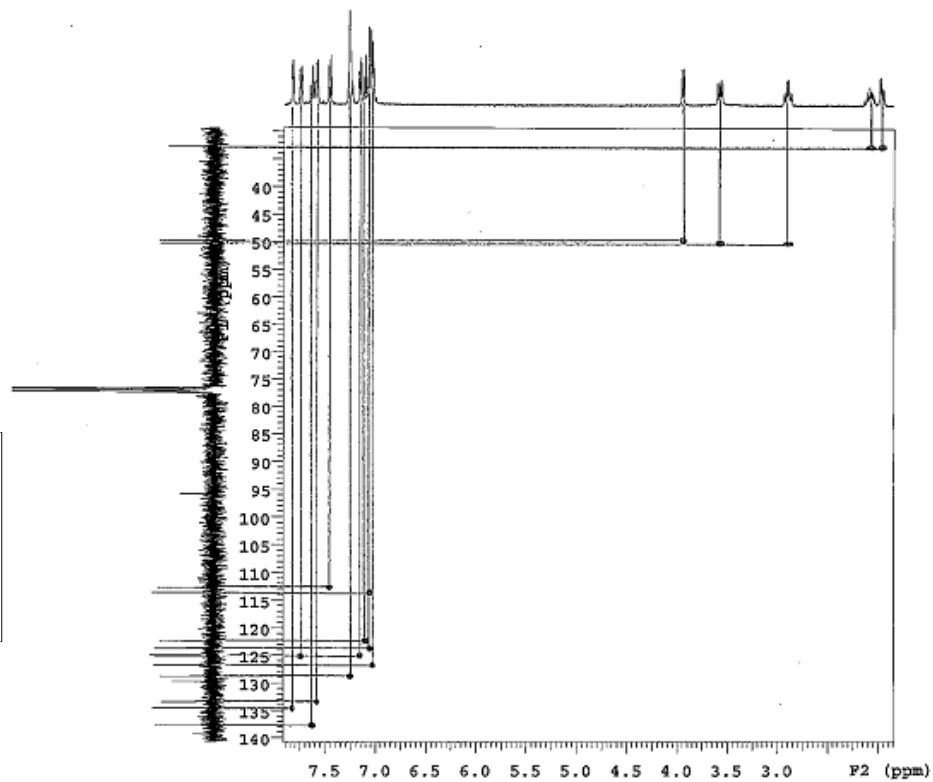HSQC of compound **2b**

ILS-BPS-CN in CDCl<sub>3</sub>  
 HMQC EPT.  
 File No. 20130731\_33

Sample Name:

Data Collected on:  
 workhole-vnmr409  
 Archive directory:

Sample directory:

FID file: 20130731\_33 ILS-BPS-CN HMQC NUS

Pulse Sequence: gHMQC  
 Solvent: cdcl<sub>3</sub>  
 Data collected on: Jul 31 2013

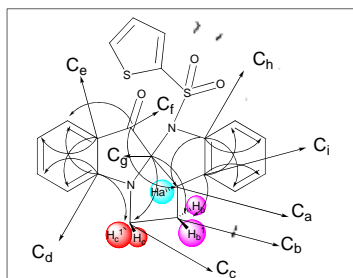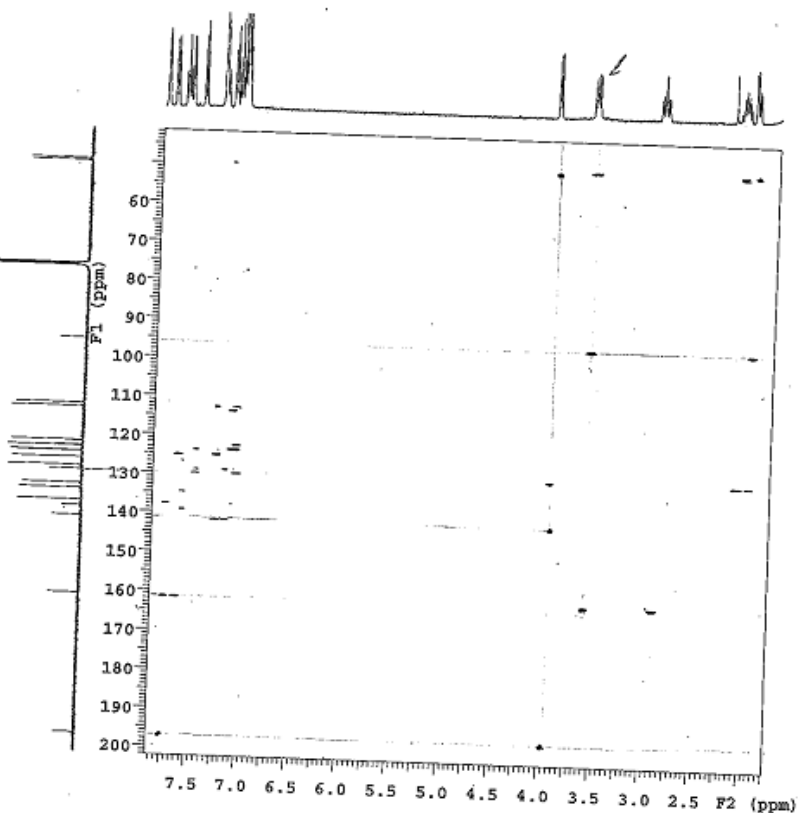

HMBC of compound **2b**

# HPLC of compound 2b

CPRI @ DRILS  
HPLC ANALYSIS REPORT

Inj Date : Thu, 29. May. 2014 Acq Operator: SHASHIDHAR  
Sample Name : ILS-BPS-3-79 Vial 52  
A.R Number : CM14E018 ->Inj. Vol. : 5µL  
Acq. Method : D:\chem32\1\DATA\290514-API 2 2014-05-29 18-15-59\AP->  
Analysis Method : D:\CHEM32\_002\1\METHODS\API DTV.M  
Method Info : Column: X-Terra C-18 250\*4.6mm, 5µm  
Mobile phase: A) 5mm Ammonium Acetate in water B) ACN  
T/%B:0/20,3/20,12/95,23/95,25/20,30/20  
Flow:1.0ml/min Diluent: ACN:WATER(50:50)

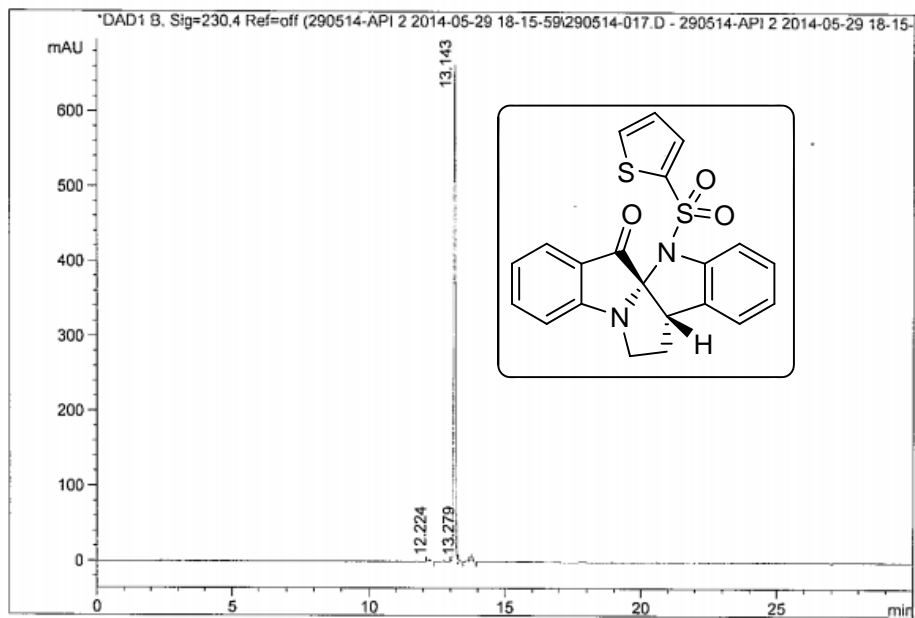

Signal 1: DAD1 B, Sig=230,4 Ref=off

| Peak # | RT [min] | Area     | Area % |
|--------|----------|----------|--------|
| 1      | 12.224   | 11.089   | 0.367  |
| 2      | 13.143   | 2960.202 | 97.887 |
| 3      | 13.279   | 8.671    | 0.287  |
| 4      | 13.773   | 44.138   | 1.460  |

Analysed by :

*Shashidhar*  
30/5/14

Checked by :

*Shashidhar*  
30/5/14

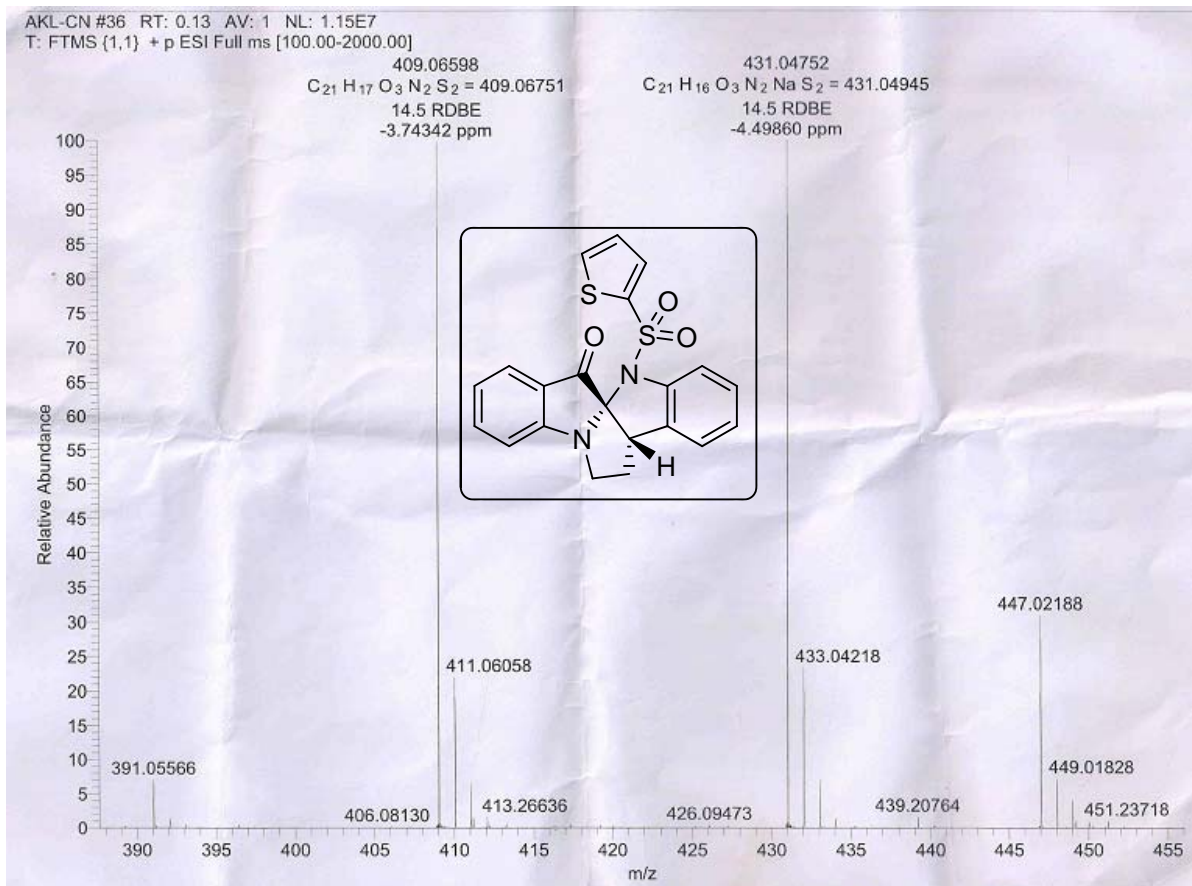

HRMS of compound **2b**



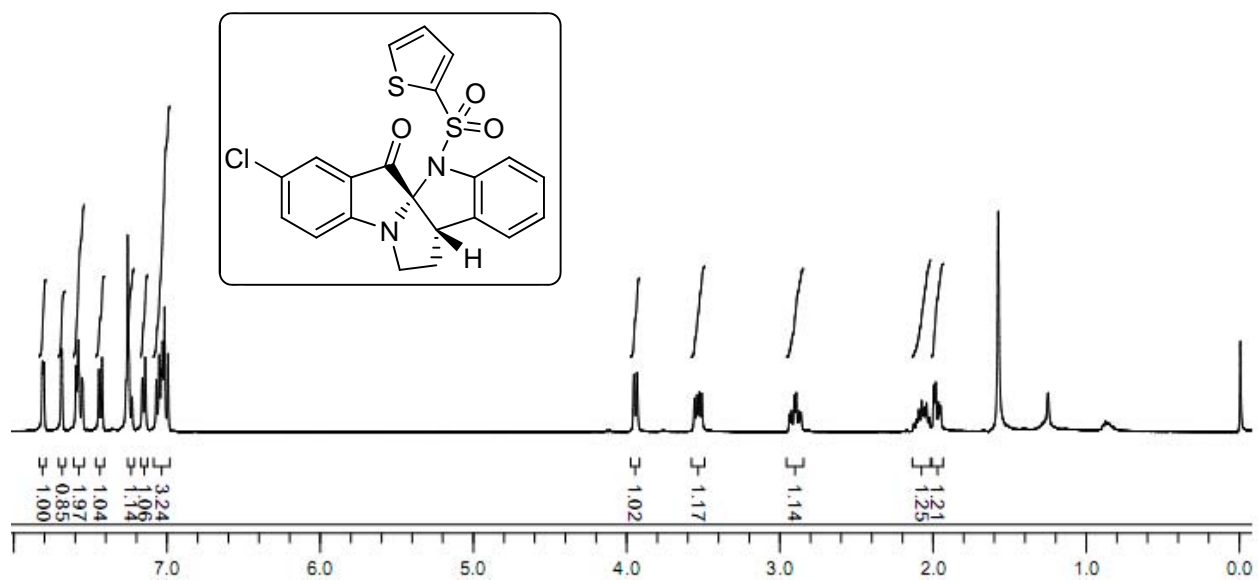

$^1\text{H}$  NMR (Varian, 400 MHz) spectrum of compound **2c** in  $\text{CDCl}_3$

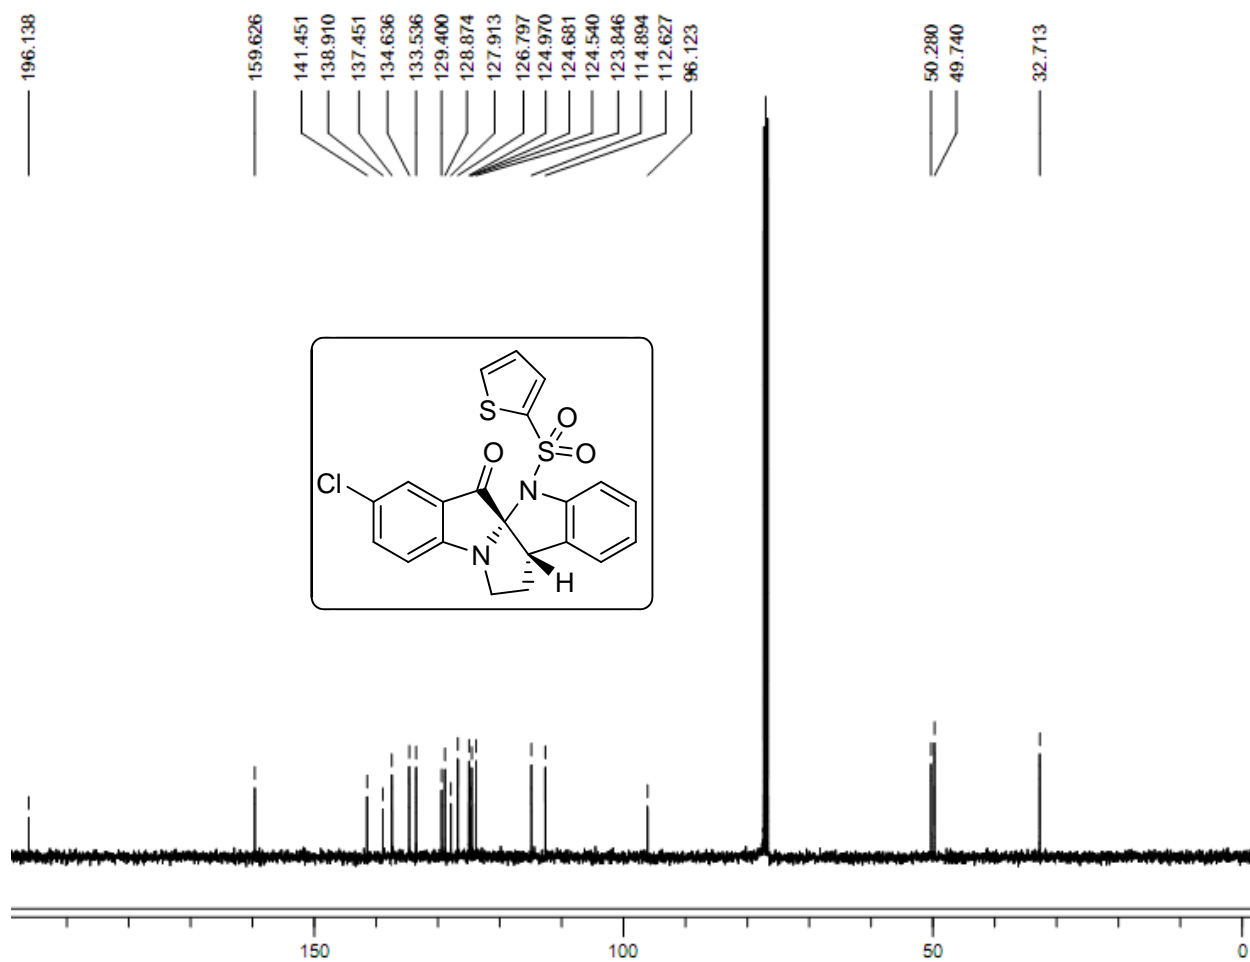

$^{13}\text{C}$  NMR spectrum (Varian, 100 MHz) of compound **2c** in  $\text{CDCl}_3$

# HPLC of compound 2c

CPRI @ DRILS  
HPLC ANALYSIS REPORT

Inj Date : Thu, 29. May. 2014 Acq Operator: SHASHIDHAR  
Sample Name : ILS-BPS-3-62 Vial 53  
A.R Number : CM14E020 ->Inj. Vol. : 5µL  
Acq. Method : D:\chem32\1\DATA\290514-API 2 2014-05-29 18-15-59\AP->  
Analysis Method : D:\CHEM32\_002\1\METHODS\API DTV.M  
Method Info : Column: X-Terra C-18 250\*4.6mm, 5µm  
Mobile phase: A) 5mm Ammonium Acetate in water B) ACN  
T/%B:0/20,3/20,12/95,23/95,25/20,30/20  
Flow:1.0ml/min Diluent: ACN:WATER(50:50)

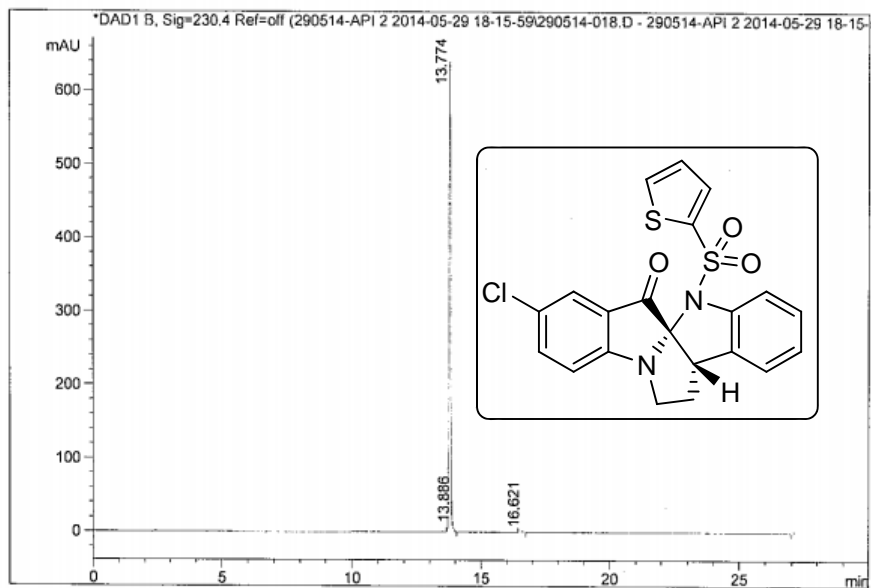

Signal 1: DAD1 B, Sig=230,4 Ref=off

| Peak # | RT [min] | Area     | Area % |
|--------|----------|----------|--------|
| 1      | 13.774   | 2858.811 | 99.049 |
| 2      | 13.886   | 18.771   | 0.650  |
| 3      | 16.621   | 8.689    | 0.301  |

Analysed by : *Shashidhar*  
30/05/14

Checked by : *P*  
30/05/14

|                      |              |                    |        |                        |              |                               |                      |
|----------------------|--------------|--------------------|--------|------------------------|--------------|-------------------------------|----------------------|
| <b>Sample Name</b>   | ILS/BPS/3-62 | <b>Position</b>    | Vial 2 | <b>Instrument Name</b> | Instrument 1 | <b>User Name</b>              |                      |
| <b>Inj Vol</b>       | 0.5          | <b>InjPosition</b> |        | <b>SampleType</b>      | Sample       | <b>IRM Calibration Status</b> | Not Applicable       |
| <b>Data Filename</b> | 040213M005.d | <b>ACQ Method</b>  | ILS.m  | <b>Comment</b>         |              | <b>Acquired Time</b>          | 2/4/2013 12:51:35 PM |

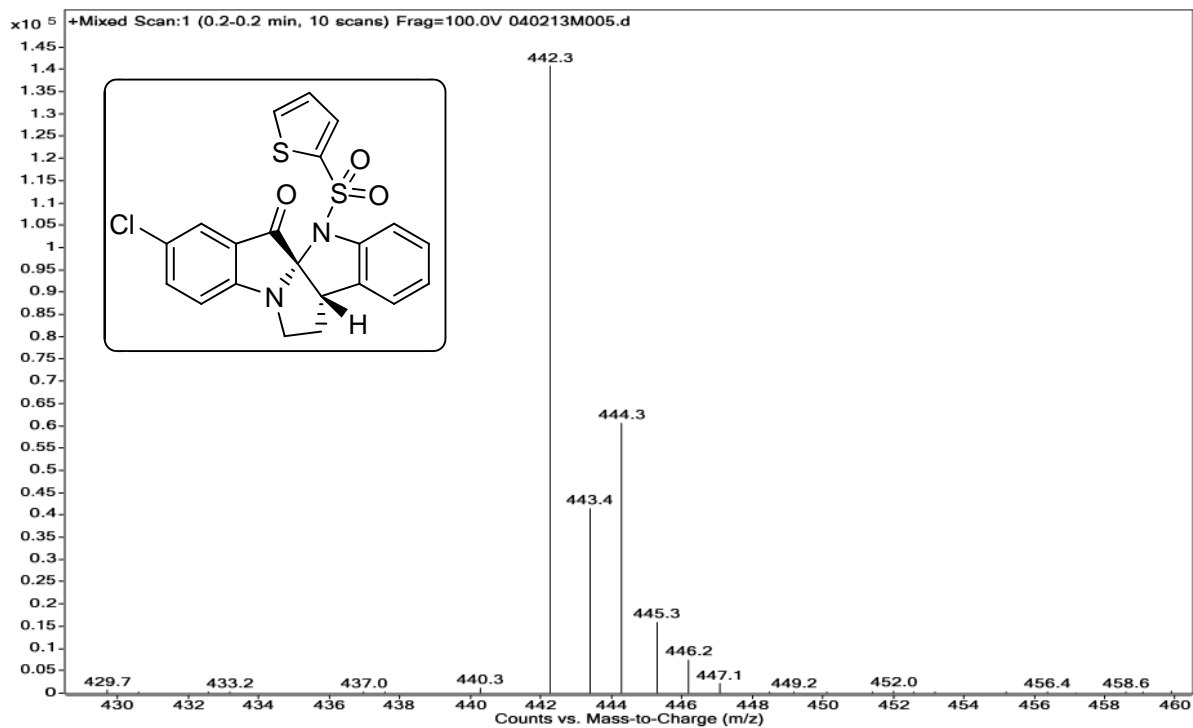

Mass spectra of compound **2c**

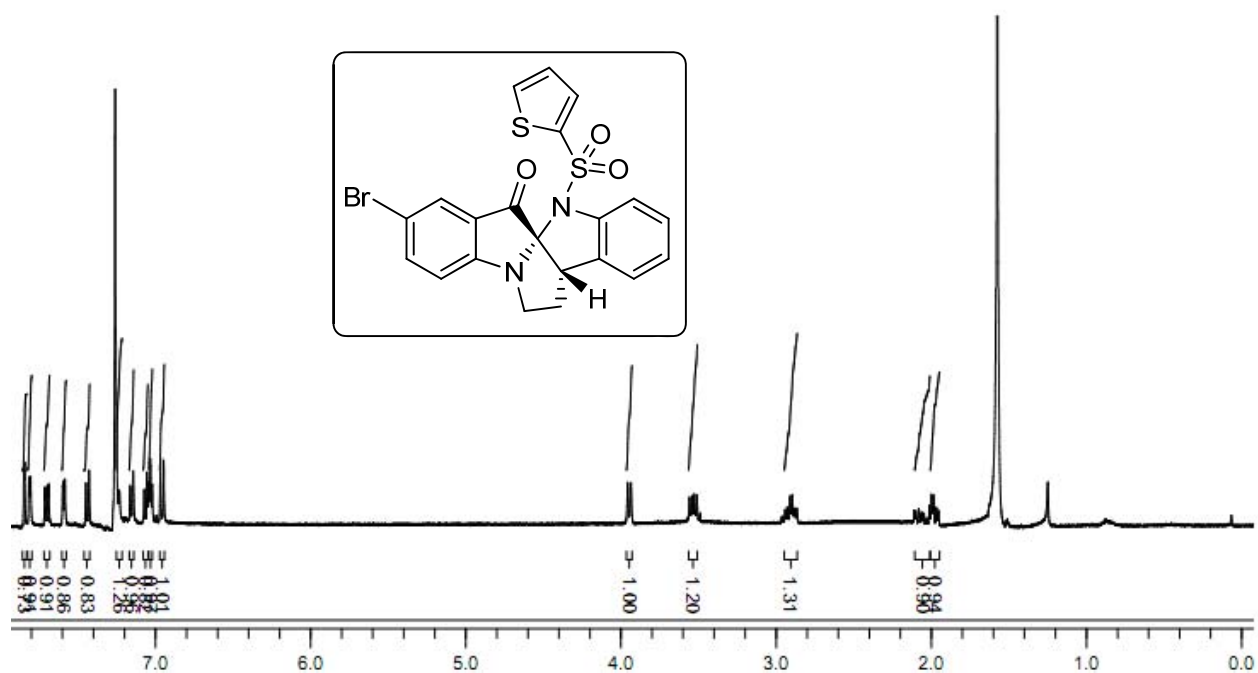

$^1\text{H}$  NMR (Varian, 400 MHz) spectrum of compound **2d** in  $\text{CDCl}_3$

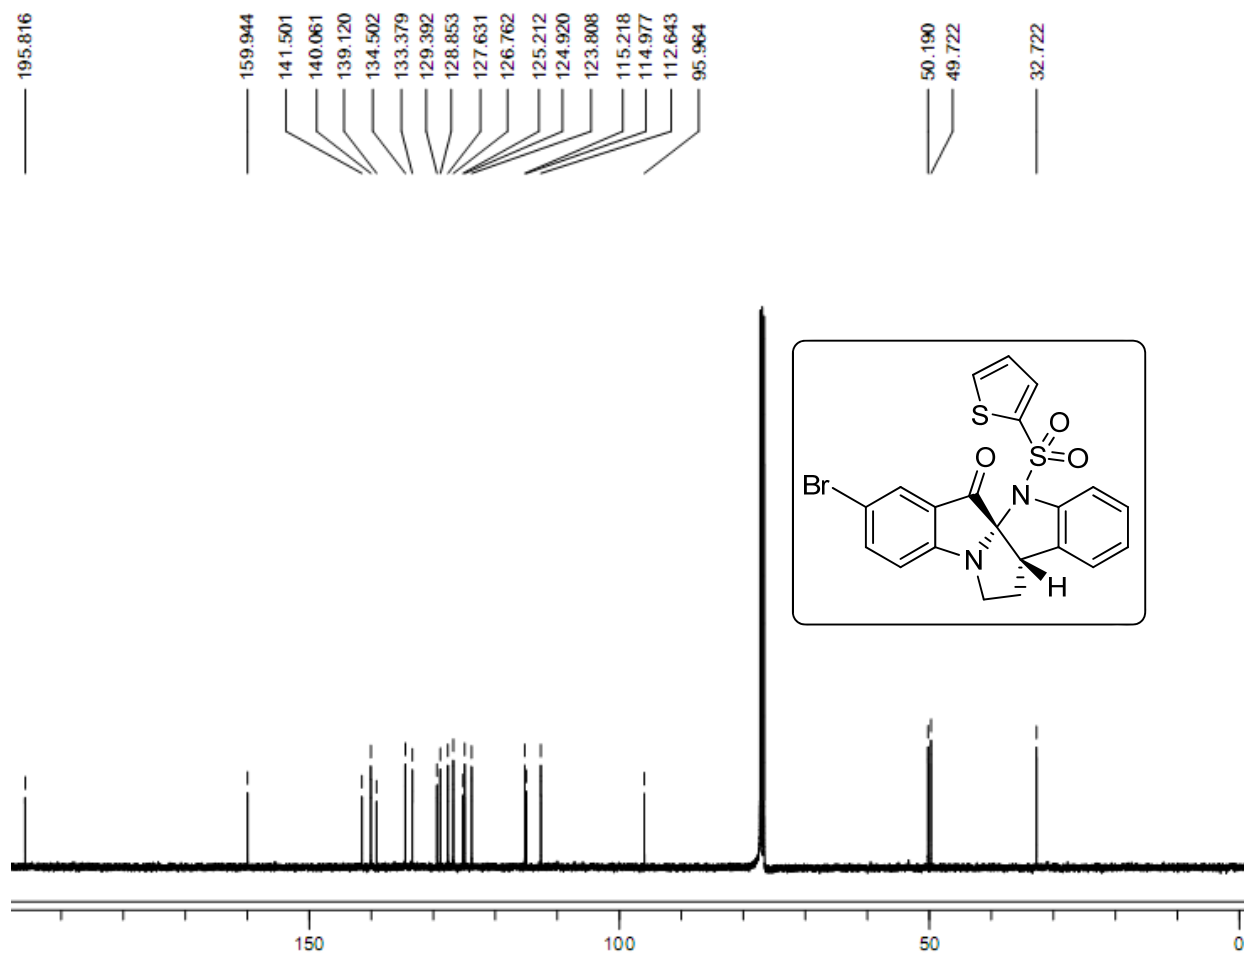

<sup>13</sup>C NMR spectrum (Varian, 100 MHz) of compound **2d** in CDCl<sub>3</sub>

# HRMS of compound 2d

## COSMIC DISCOVERIES @ ILS HPLC ANALYSIS REPORT

Injection Date : Wed, 27. Mar. 2013  
Sample Name : ILS-BPS-3-85  
Acq Operator : VARMA  
Acq. Method : D:\Chem32\1\DATA\270313-MC 2013-03-27 11-23-46\C-18 ->  
Analysis Method : D:\CHEM32\1\METHODS\C-18 A80B20GM.M  
Method Info : Column:Symmetry C-18 75\*4.6mm,3.5µ  
Mobile phase: A) 0.1% HCOOH in water,B) ACN (GRADIENT) T/  
B%:0/20,0.5/20,4/98,10/98,10.5/20,12/20  
Flow:1.0 ml/min Diluent: ACN:Water(80:20)

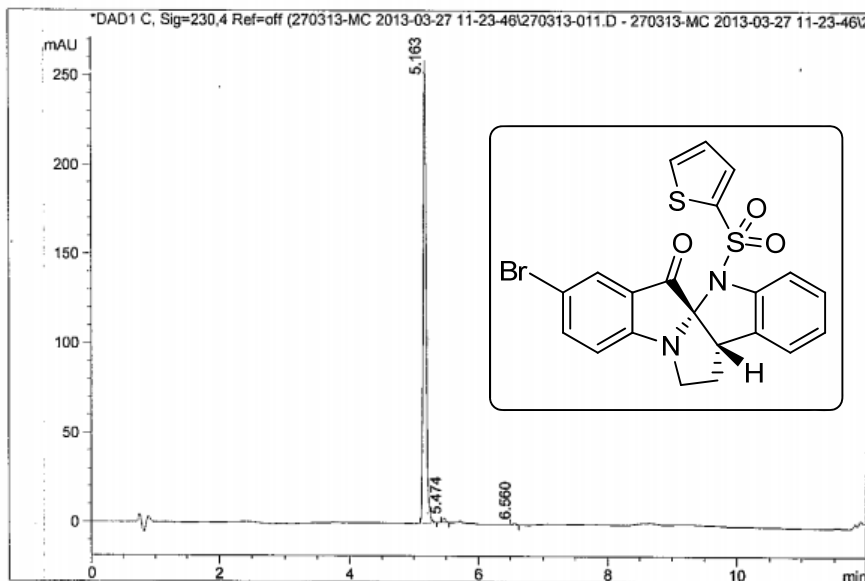

Signal 1: DAD1 C, Sig=230,4 Ref=off

| Peak # | RT [min] | Area    | Area % |
|--------|----------|---------|--------|
| 1      | 5.163    | 841.146 | 99.003 |
| 2      | 5.474    | 6.264   | 0.737  |
| 3      | 6.560    | 2.204   | 0.259  |

*Pajis  
27/3/13*

\*\*\* End of Report \*\*\*

|               |              |             |         |                 |              |                        |                      |
|---------------|--------------|-------------|---------|-----------------|--------------|------------------------|----------------------|
| Sample Name   | ILS/BFS/3-05 | Position    | Vial 15 | Instrument Name | Instrument 1 | User Name              |                      |
| Inj Vol       | 0.5          | InjPosition |         | SampleType      | Sample       | IRM Calibration Status | Not Applicable       |
| Data Filename | 250313M016.d | ACQ Method  | ILS.m   | Comment         |              | Acquired Time          | 3/25/2013 6:13:44 PM |

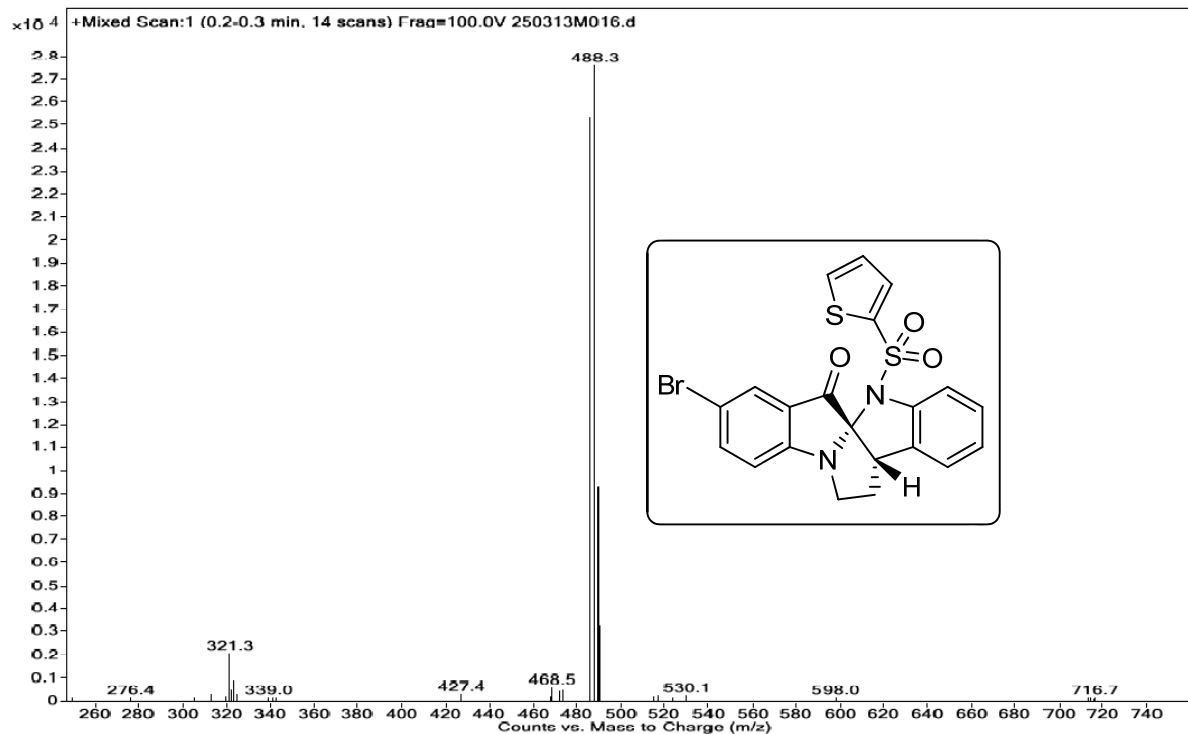

Mass spectra of compound **2d**



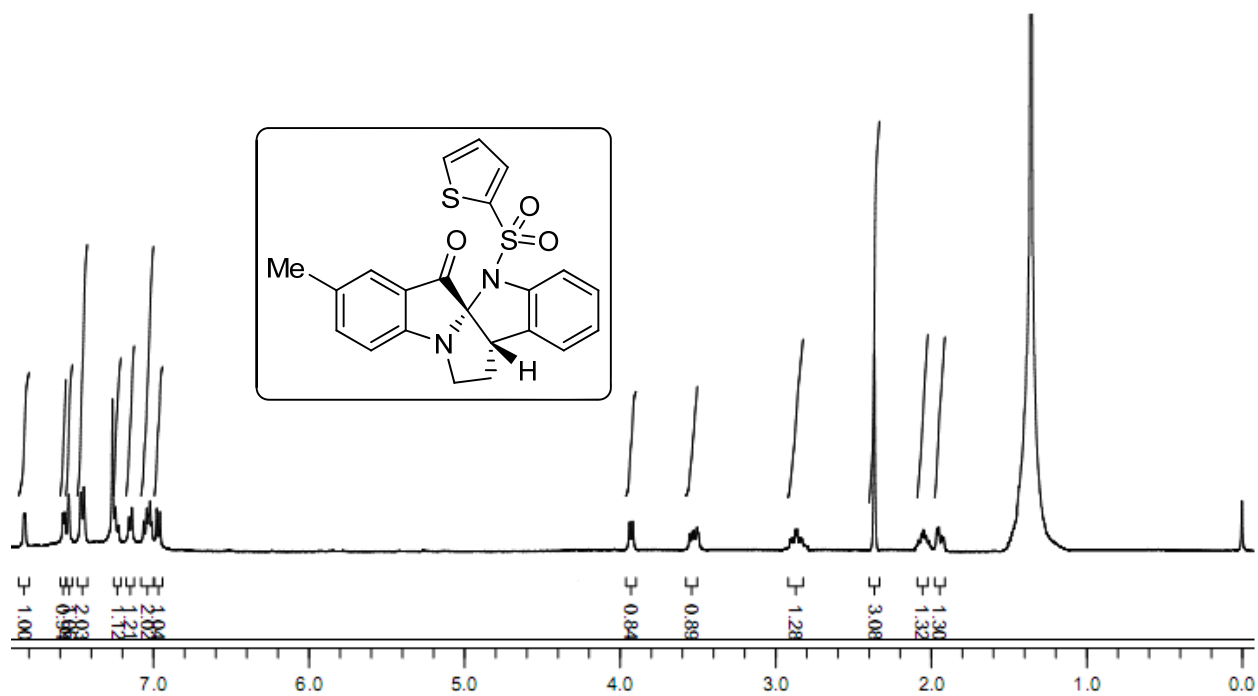

$^1\text{H}$  NMR (Varian, 400 MHz) spectrum of compound **2e** in  $\text{CDCl}_3$

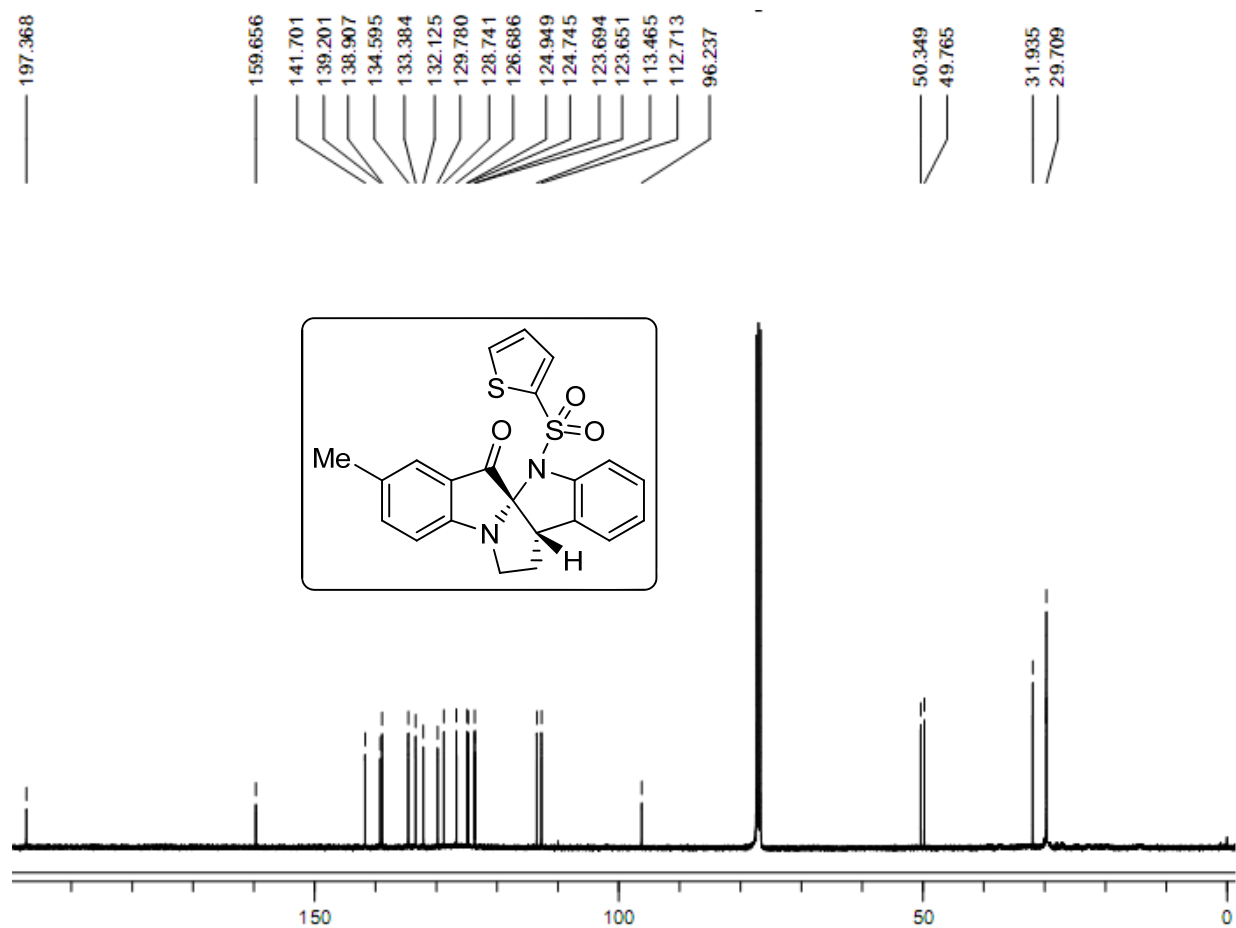

$^{13}\text{C}$  NMR spectrum (Varian, 100 MHz) of compound **2e** in  $\text{CDCl}_3$

|             |               |               |                      |               |              |                 |              |
|-------------|---------------|---------------|----------------------|---------------|--------------|-----------------|--------------|
| Sample Name | ILS-BPS-3-113 | Position      | Vial 95              | Sample type   |              | Instrument Name | Instrument 1 |
| User Name   |               | Inj Vol       | 0.5                  | Data Filename | 290514M032.d | ACQ Method      | test.m       |
| AR NO :     | MM14E037      | Acquired Time | 5/29/2014 5:39:19 PM |               |              |                 |              |

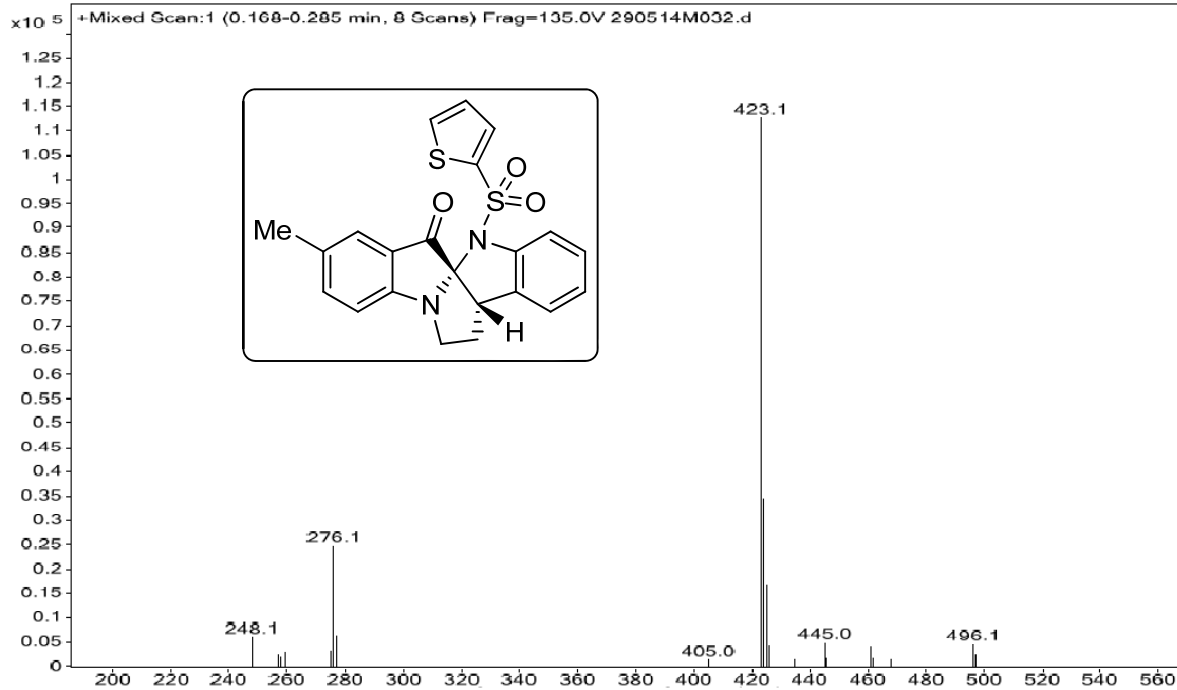

Mass spectra of compound **2e**

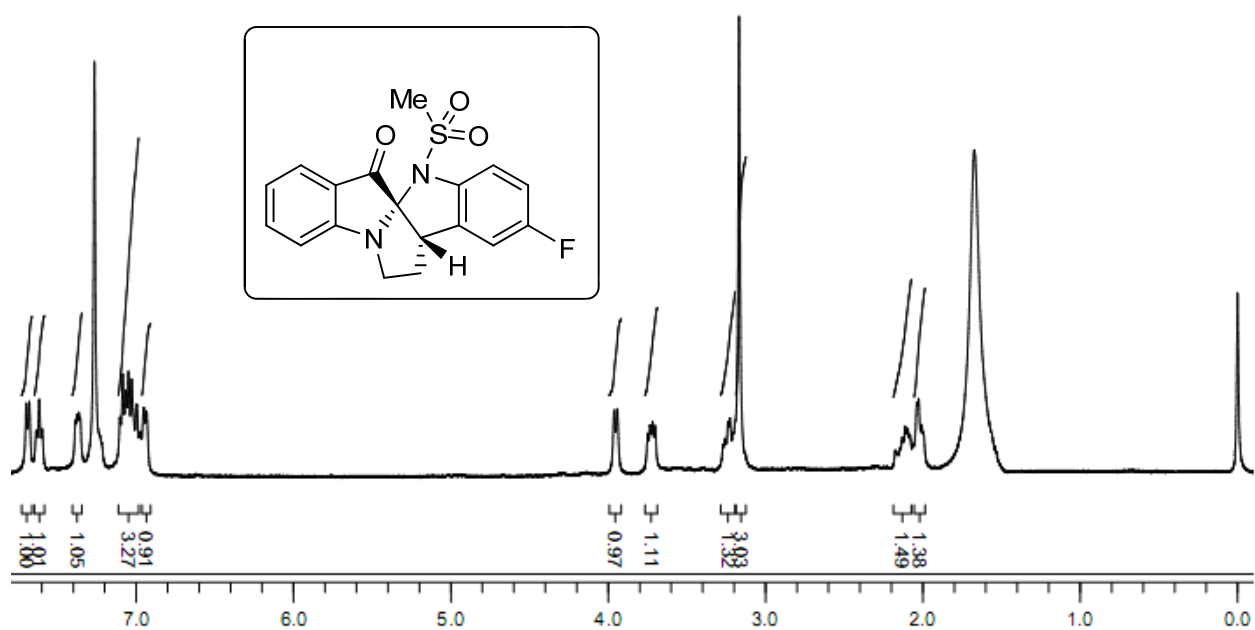

$^1\text{H}$  NMR (Varian, 400 MHz) spectrum of compound **2f** in  $\text{CDCl}_3$

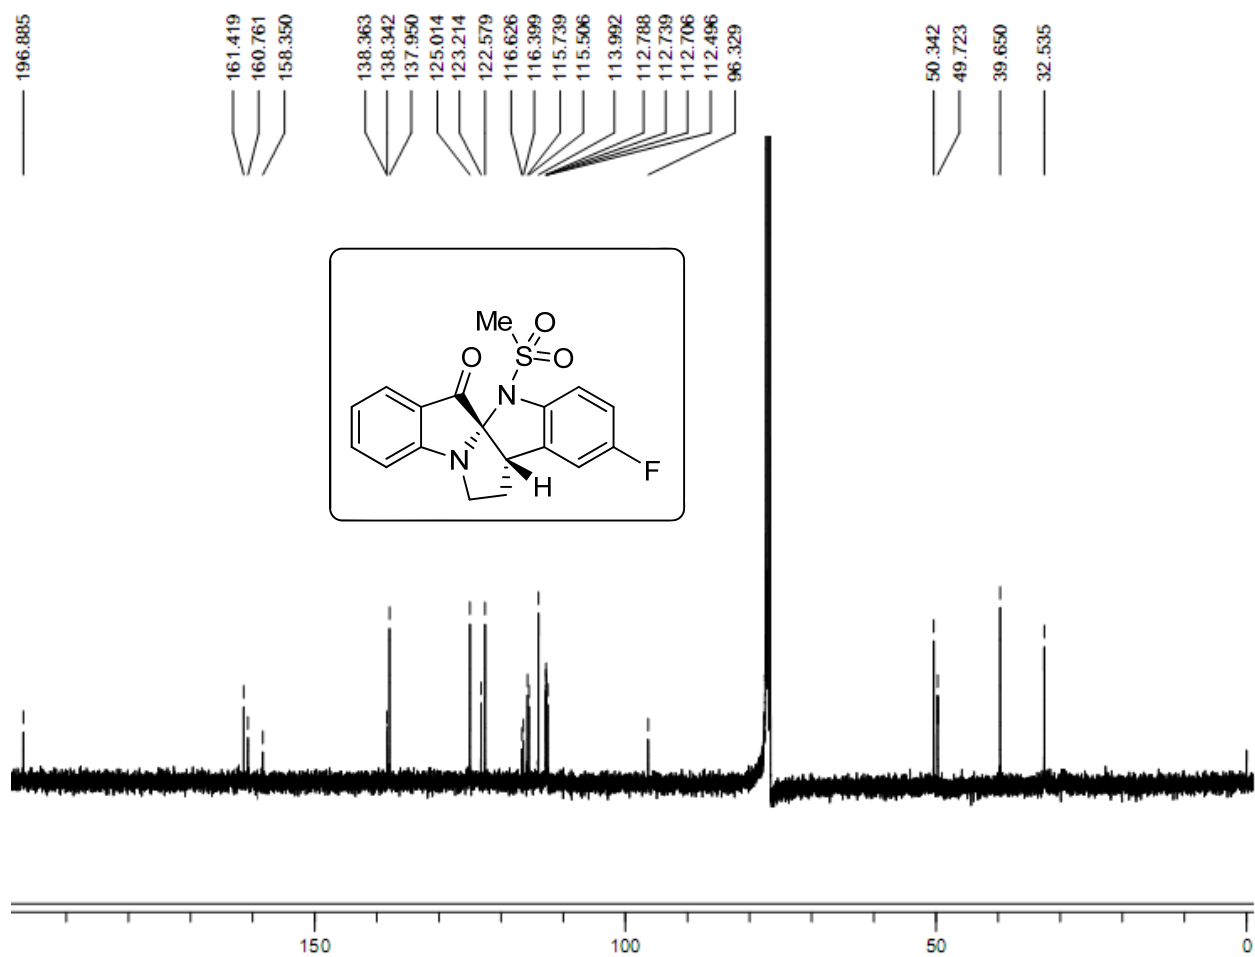

<sup>13</sup>C NMR spectrum (Varian, 100 MHz) of compound **2f** in CDCl<sub>3</sub>

# HPLC of compound 2f

CPRI @ DRILS  
HPLC ANALYSIS REPORT

Inj Date : Thu, 29. May. 2014 Acq Operator: SHASHIDHAR  
Sample Name : ILS-BPS-3-135 Vial 51  
A.R Number : CM14E017 -->Inj. Vol. : 5µL  
Acq. Method : D:\chem32\1\DATA\290514-API 2 2014-05-29 18-15-59\AP->  
Analysis Method : D:\CHEM32\_002\1\METHODS\API DTV.M  
Method Info : Column: X-Terra C-18 250\*4.6mm, 5µm  
Mobile phase: A) 5mm Ammonium Acetate in water B) ACN  
T/%B:0/20,3/20,12/95,23/95,25/20,30/20  
Flow:1.0ml/min Diluent: ACN:WATER(50:50)

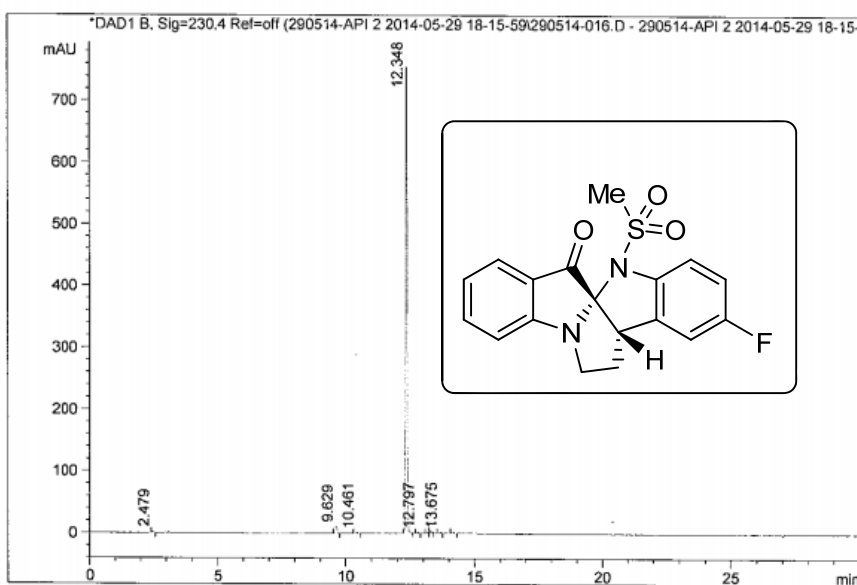

Signal 1: DAD1 B, Sig=230,4 Ref=off

| Peak # | RT [min] | Area     | Area % |
|--------|----------|----------|--------|
| 1      | 2.479    | 7.857    | 0.231  |
| 2      | 9.629    | 51.959   | 1.526  |
| 3      | 10.461   | 6.799    | 0.200  |
| 4      | 12.348   | 3296.286 | 96.790 |
| 5      | 12.797   | 5.788    | 0.170  |
| 6      | 13.188   | 7.891    | 0.232  |
| 7      | 13.308   | 11.549   | 0.339  |
| 8      | 13.675   | 5.793    | 0.170  |
| 9      | 14.164   | 11.693   | 0.343  |

|                      |               |                    |         |                        |              |                               |                      |
|----------------------|---------------|--------------------|---------|------------------------|--------------|-------------------------------|----------------------|
| <b>Sample Name</b>   | ILS-BPS-3-135 | <b>Position</b>    | Vial 34 | <b>Instrument Name</b> | Instrument 1 | <b>User Name</b>              |                      |
| <b>Inj Vol</b>       | 0.5           | <b>InjPosition</b> |         | <b>SampleType</b>      | Sample       | <b>IRM Calibration Status</b> | Not Applicable       |
| <b>Data Filename</b> | 080813M004.d  | <b>ACQ Method</b>  | test.m  | <b>Comment</b>         |              | <b>Acquired Time</b>          | 8/8/2013 10:53:53 AM |

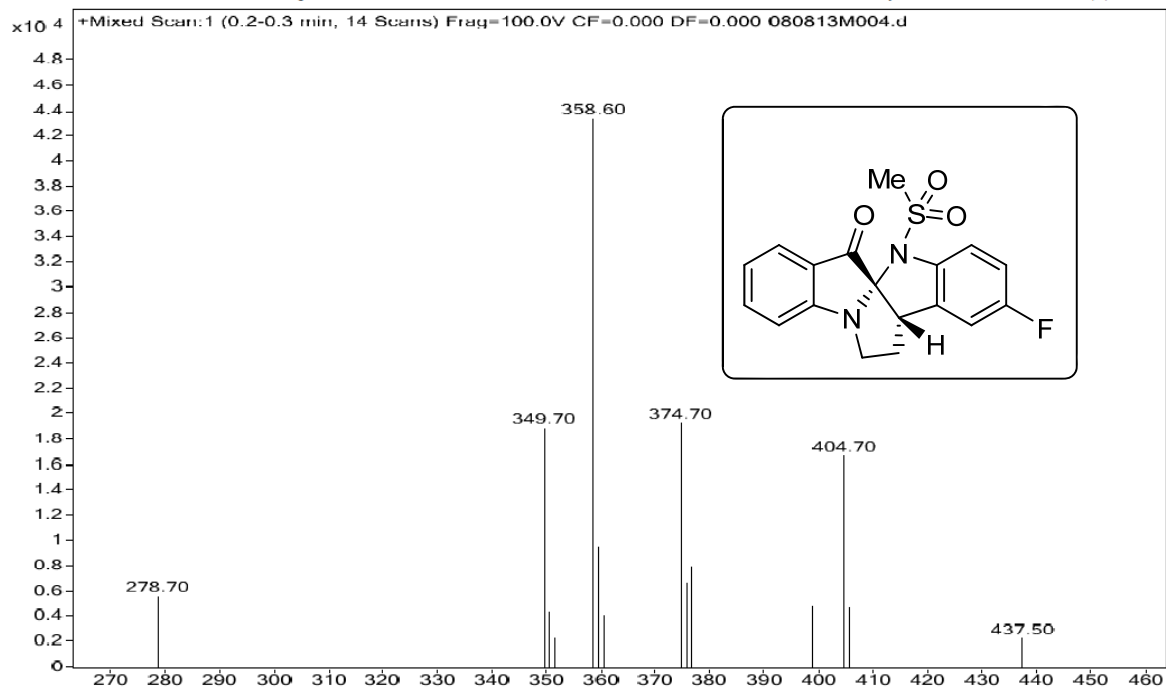

Mass spectra of compound **2f**

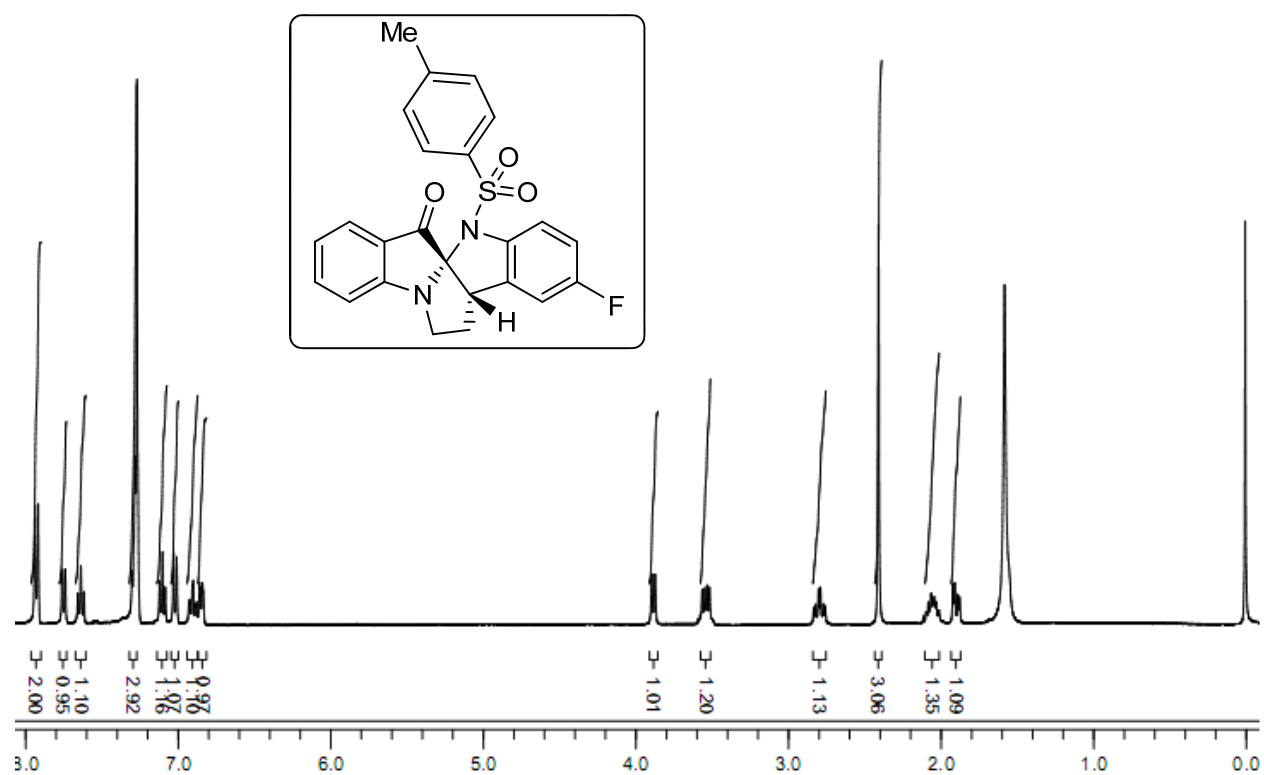

$^1\text{H}$  NMR (Varian, 400 MHz) spectrum of compound **2g** in  $\text{CDCl}_3$



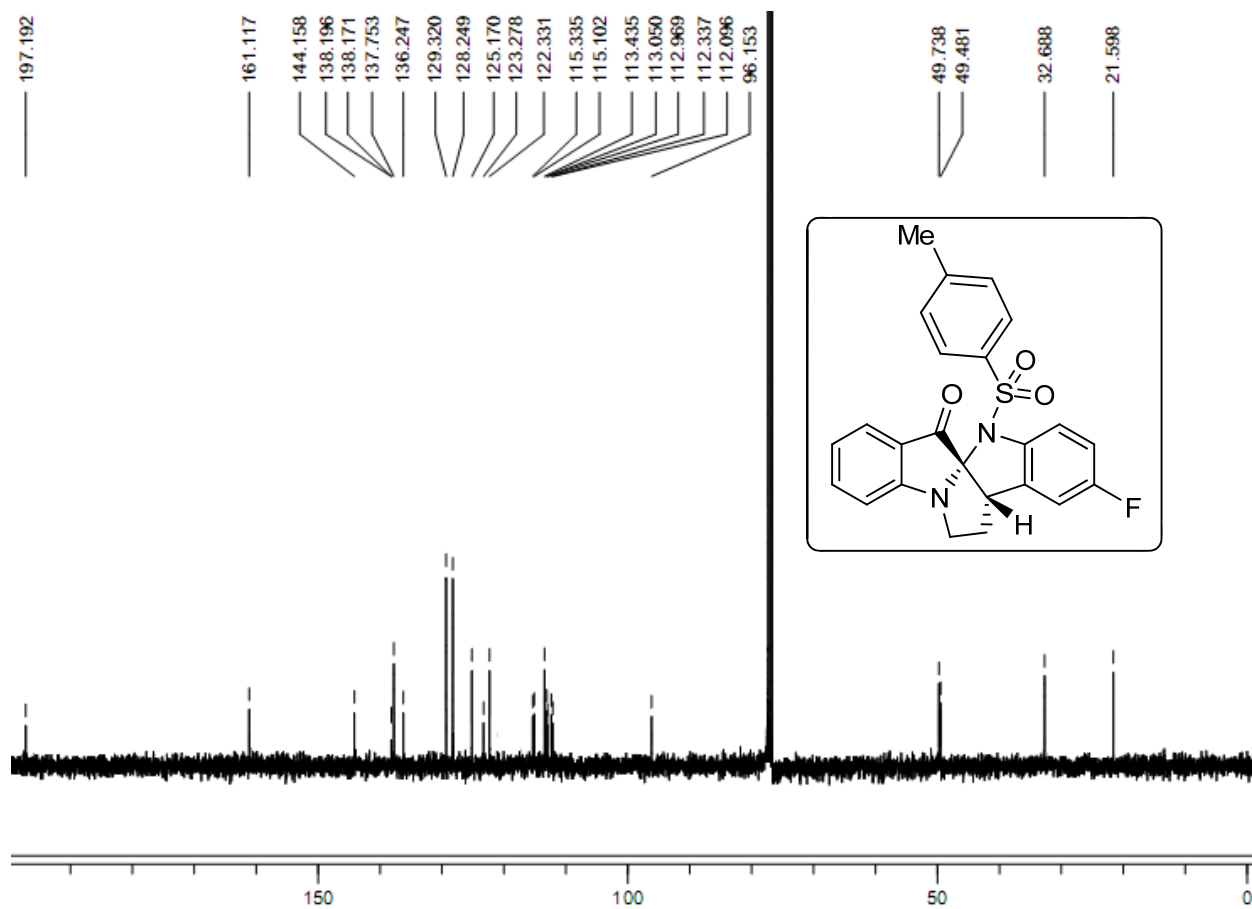

$^{13}\text{C}$  NMR spectrum (Varian, 100 MHz) of compound **2g** in  $\text{CDCl}_3$

# HPLC of compound 2g

CPRI @ DRILS  
HPLC ANALYSIS REPORT

Inj Date : Fri, 30. May. 2014 Acq Operator: SHASHIDHAR  
Sample Name : ILS-BPS-3-117 Vial 54  
A.R Number : CM14E019 Inj. Vol. : 5µL  
Acq. Method : D:\chem32\1\DATA\290514-API 2 2014-05-29 18-15-59\AP->  
Analysis Method : D:\CHEM32\_002\1\METHODS\API DTV.M  
Method Info : Column: X-Terra C-18 250\*4.6mm, 5µm  
Mobile phase: A) 5mm Ammonium Acetate in water B) ACN  
T/%B:0/20,3/20,12/95,23/95,25/20,30/20  
Flow:1.0ml/min Diluent: ACN:WATER(50:50)

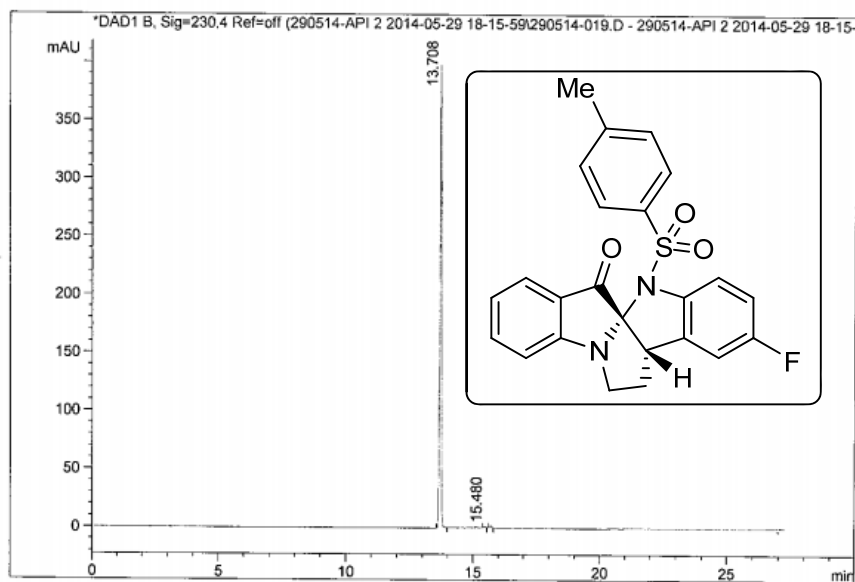

Signal 1: DAD1 B, Sig=230,4 Ref=off

| Peak # | RT [min] | Area     | Area % |
|--------|----------|----------|--------|
| 1      | 13.708   | 1782.930 | 99.291 |
| 2      | 15.480   | 5.937    | 0.331  |
| 3      | 15.707   | 6.795    | 0.378  |

Analysed by :

*Shish*  
30/05/14

Checked by :

*pc*  
30/5/14

|             |               |               |                      |               |              |                 |              |
|-------------|---------------|---------------|----------------------|---------------|--------------|-----------------|--------------|
| Sample Name | ILS-BPS-3-117 | Position      | Vial 96              | Sample type   |              | Instrument Name | Instrument 1 |
| User Name   |               | Inj Vol       | 0.5                  | Data Filename | 290514M033.d | ACQ Method      | test.m       |
| AR NO :     | MM14E039      | Acquired Time | 5/29/2014 5:40:37 PM |               |              |                 |              |

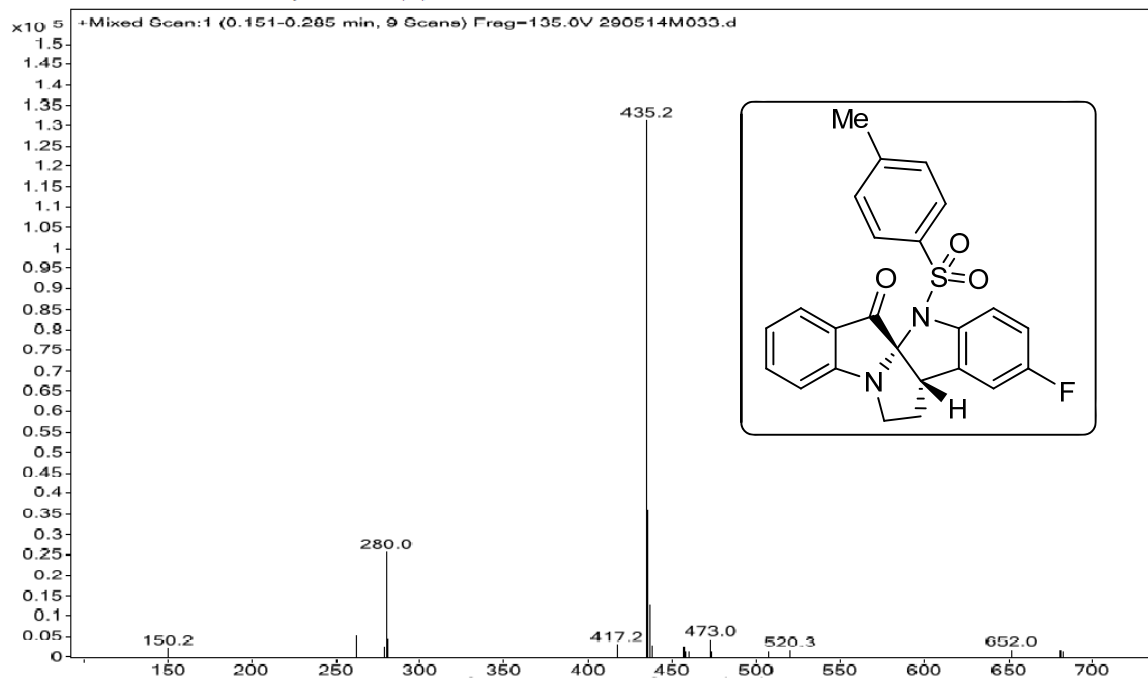

Mass spectra of compound **2g**

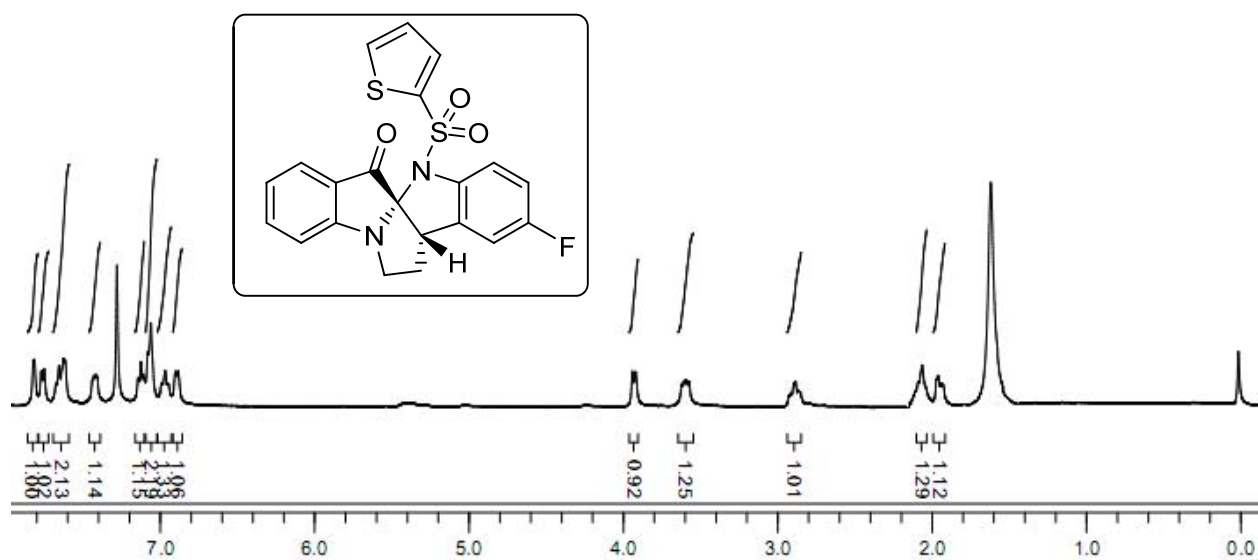

$^1\text{H}$  NMR (Varian, 400 MHz) spectrum of compound **2h** in  $\text{CDCl}_3$

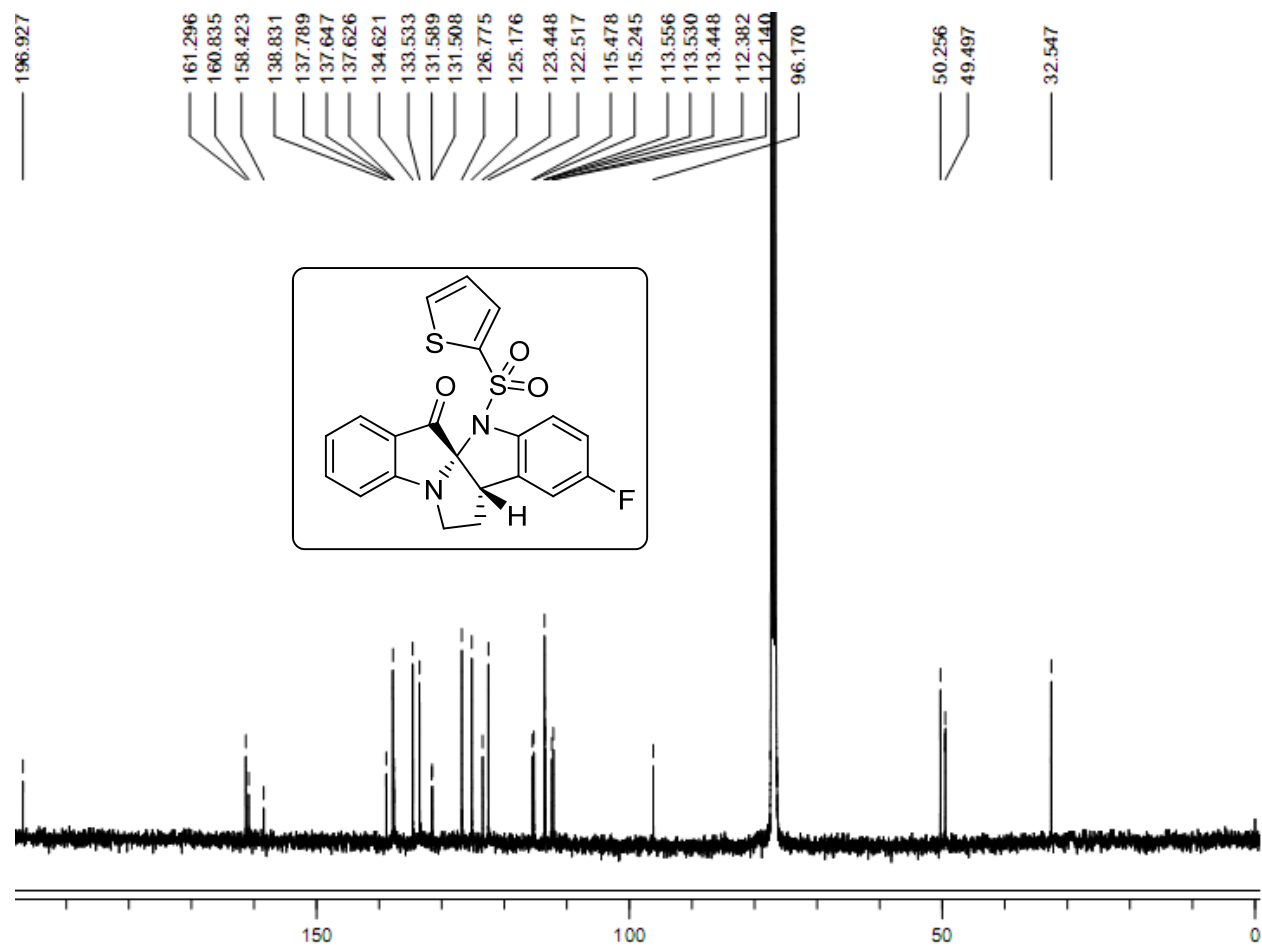

$^{13}\text{C}$  NMR spectrum (Varian, 100 MHz) of compound **2h** in  $\text{CDCl}_3$

# HPLC of compound 2h

CPRI @ DRILS  
HPLC ANALYSIS REPORT

Inj Date : Thu, 5. Jun. 2014 Acq Operator: SHASHIDHAR  
Sample Name : ILS-BPS-3-141 Vial 14  
A R Number : CM14F001 -> Inj. Vol. : 5µL  
Acq. Method : D:\chem32\1\DATA\050614-API-2 2014-06-05 17-06-23\AP->  
Analysis Method : D:\CHEM32\_002\1\METHODS\API DTV.M  
Method Info : Column: X-Terra C-18 250\*4.6mm, 5µm  
Mobile phase: A) 5mm Ammonium Acetate in water B) ACN  
T/%B: 0/20, 3/20, 12/95, 23/95, 25/20, 30/20  
Flow: 1.0ml/min Diluent: ACN:WATER(50:50)

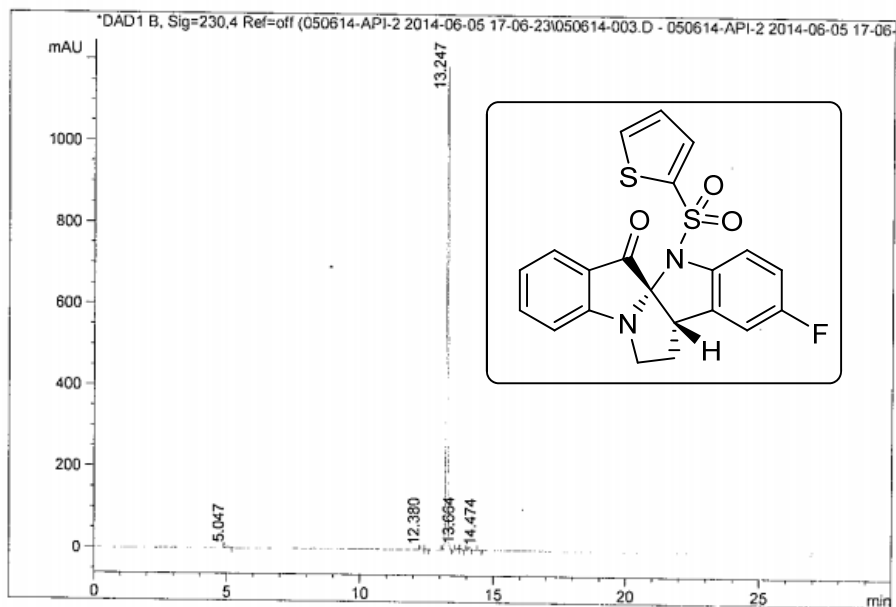

Signal 1: DAD1 B, Sig=230,4 Ref=off

| Peak # | RT [min] | Area     | Area % |
|--------|----------|----------|--------|
| 1      | 5.047    | 18.914   | 0.353  |
| 2      | 12.380   | 5.234    | 0.098  |
| 3      | 12.505   | 6.563    | 0.123  |
| 4      | 13.247   | 5243.596 | 97.982 |
| 5      | 13.664   | 19.120   | 0.357  |
| 6      | 13.771   | 21.259   | 0.397  |
| 7      | 14.104   | 29.528   | 0.552  |
| 8      | 14.474   | 7.351    | 0.137  |

Analysed by

*06/06/14*

Checked by :

*06/06/14*

Document 1

Fri, 6. Jun. 2014

09:44:06 am

Page 1 of 1

|             |               |               |                      |               |              |                 |              |
|-------------|---------------|---------------|----------------------|---------------|--------------|-----------------|--------------|
| Sample Name | ILS-BPS-3-141 | Position      | Vial 94              | Sample type   |              | Instrument Name | Instrument 1 |
| User Name   |               | Inj Vol       | 0.5                  | Data Filename | 290514M031.d | ACQ Method      | test.m       |
| AR NO:      | MM14E036      | Acquired Time | 5/29/2014 5:38:00 PM |               |              |                 |              |

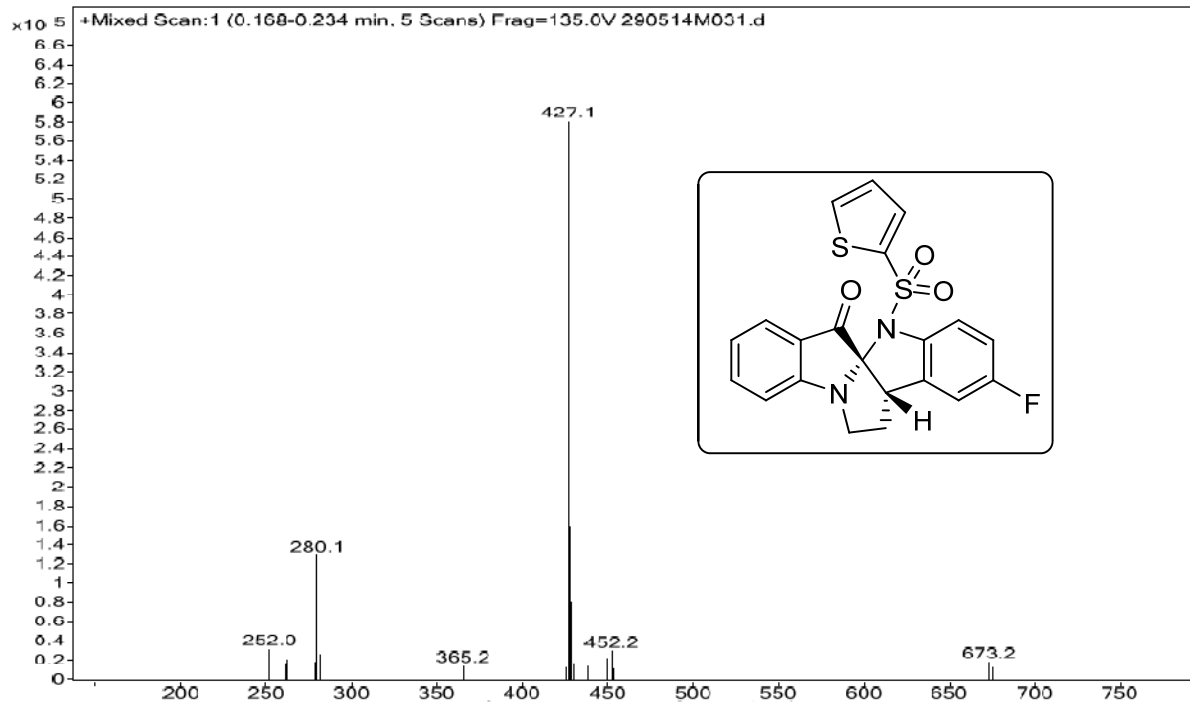

Mass spectra of compound **2h**

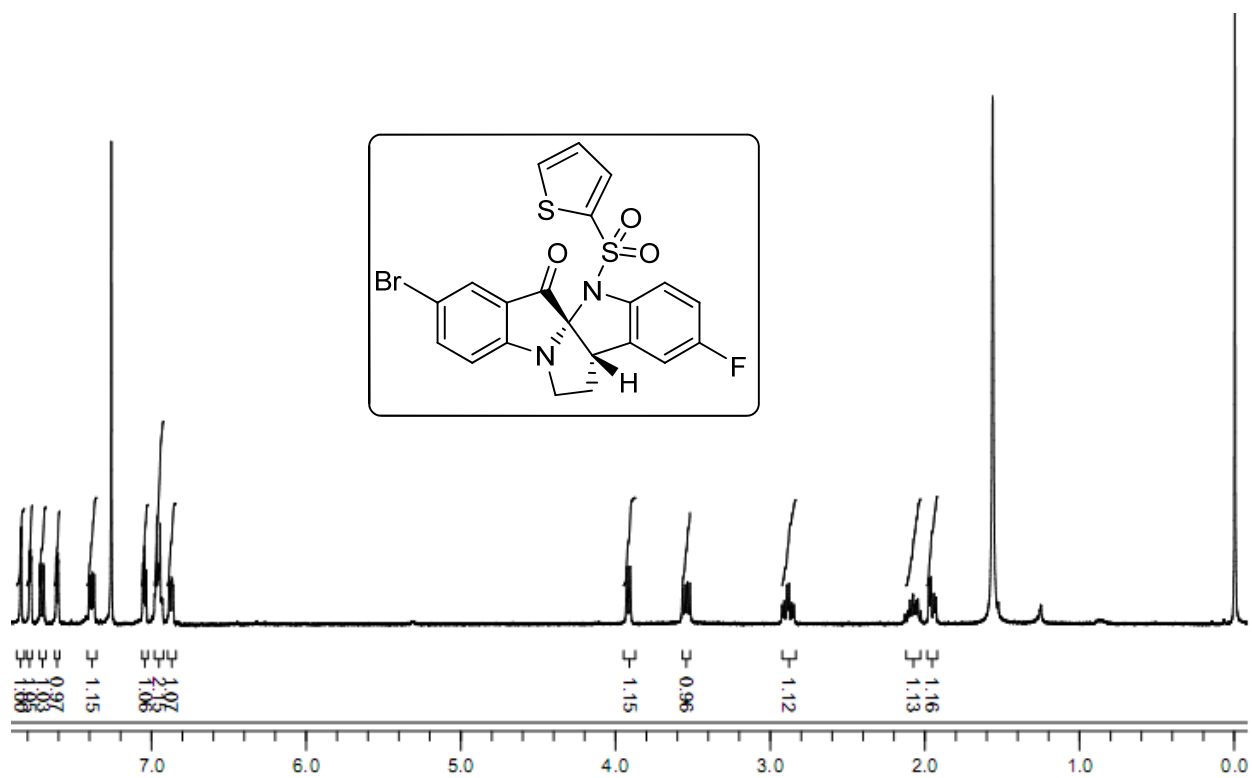

$^1\text{H}$  NMR (Varian, 400 MHz) spectrum of compound **2i** in  $\text{CDCl}_3$



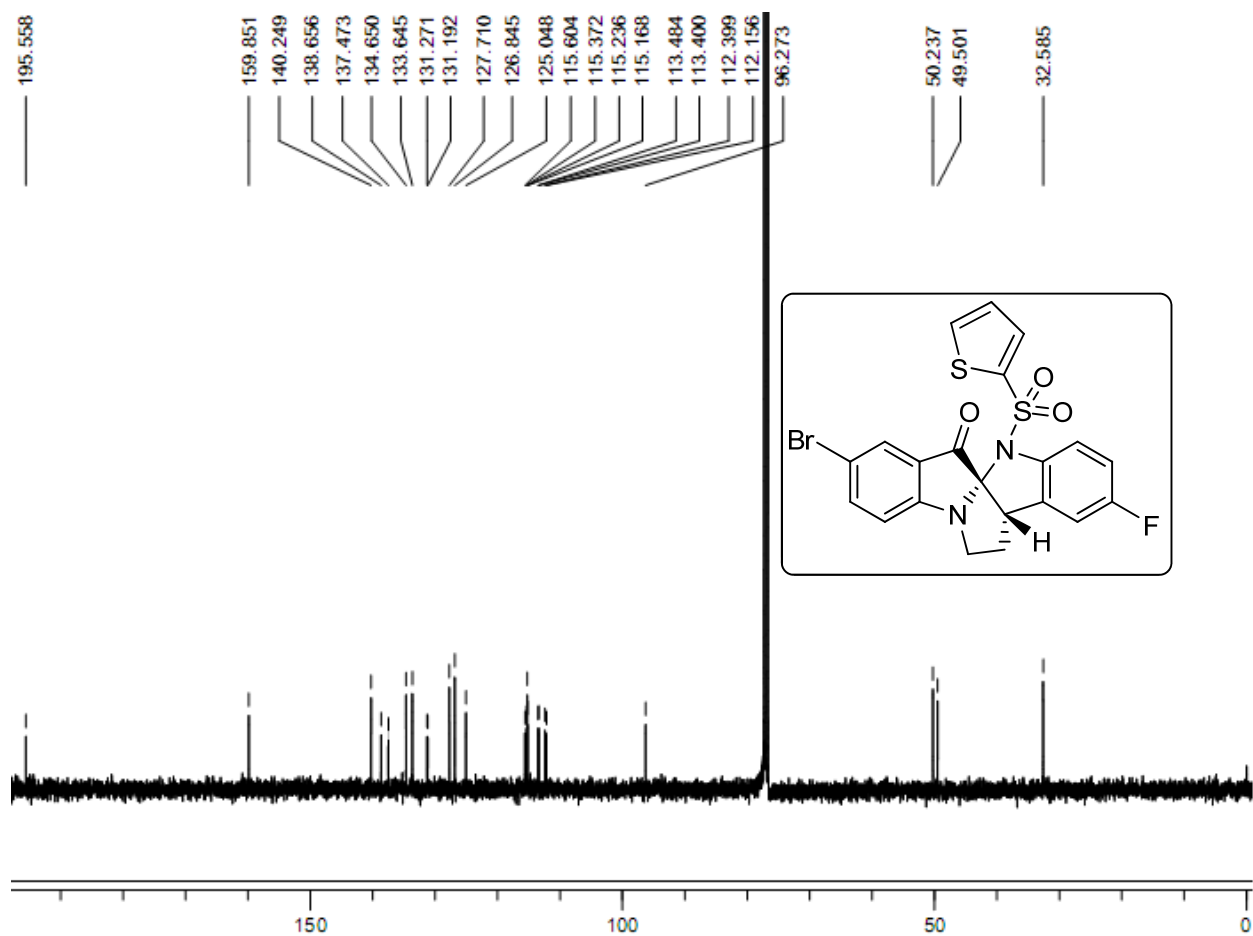

<sup>13</sup>C NMR spectrum (Varian, 100 MHz) of compound **2i** in CDCl<sub>3</sub>

# HPLC of compound 2i

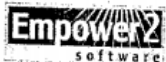

CPRI@DRILS

## SAMPLE INFORMATION

|                   |                          |                     |                               |
|-------------------|--------------------------|---------------------|-------------------------------|
| Sample Name:      | ILS-BPS-3-175            | Acq operator:       | Vaishnavi                     |
| A.R Number:       | CM14D002                 | Acq. Method Set:    | METHOD                        |
| Vial:             | 4                        | Processing Method:  | METHOD_PRO                    |
| Injection #:      | 1                        | Channel Name:       | 235.0nm                       |
| Injection Volume: | 5.00 ul                  | Proc. Chnl. Descr.: | PDA 235.0 nm Blank Subtracted |
| Run Time:         | 12.0 Minutes             |                     |                               |
| Sample Set Name:  | 040414                   |                     |                               |
| Date Acquired:    | 4/4/2014 12:47:36 PM IST |                     |                               |
| Date Processed:   | 4/4/2014 1:58:44 PM IST  |                     |                               |

Column: Symmetry C-18 75\*4.6mm 3µm  
 Mobile phase: A) 0.1% TFA in water B) ACN  
 T/B: 0/50, 1/50, 3/98, 10/98, 10.5/50, 12/50  
 Flow: 1.0 ml/min, Diluent: ACN

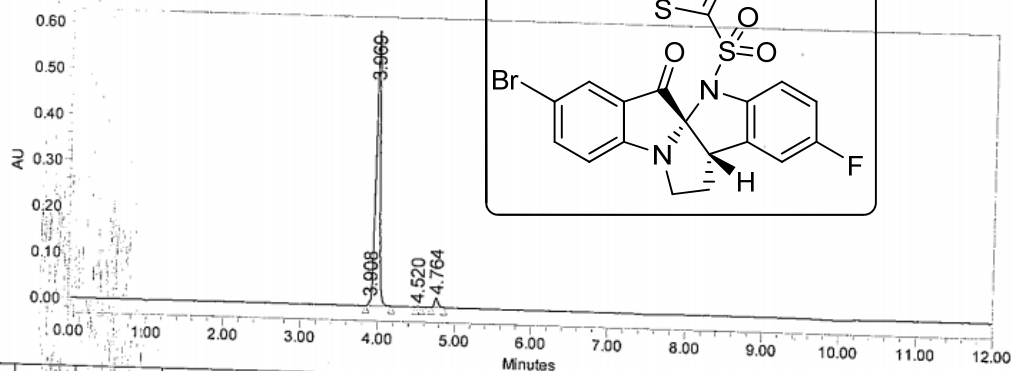

|   | RT    | Area    | % Area | Height |
|---|-------|---------|--------|--------|
| 1 | 3.908 | 16849   | 0.76   | 12850  |
| 2 | 3.969 | 2120119 | 95.97  | 596912 |
| 3 | 4.520 | 3631    | 0.16   | 1266   |
| 4 | 4.764 | 68451   | 3.10   | 20688  |

Analysed By *M*  
04/04/14

Checked By *AS*  
04/04/14

Reported by User: System  
 Report Method: CPRI@DRILS  
 Report Method ID: 3377  
 Page: 1 of 1

Project Name: APRIL\_2014  
 Date Printed: 4/4/2014  
 2:01:37 PM Asia/Calcutta

Sample Name ILS-BPS-3-175  
User Name  
AR NO : MM14D011  
Position Vial 19  
Inj Vol 0.5  
Acquired Time 4/4/2014 10:09:36 AM

Sample type  
Data Filename 040414M002.d

Instrument Name  
ACQ Method  
Instrument 1  
test.m

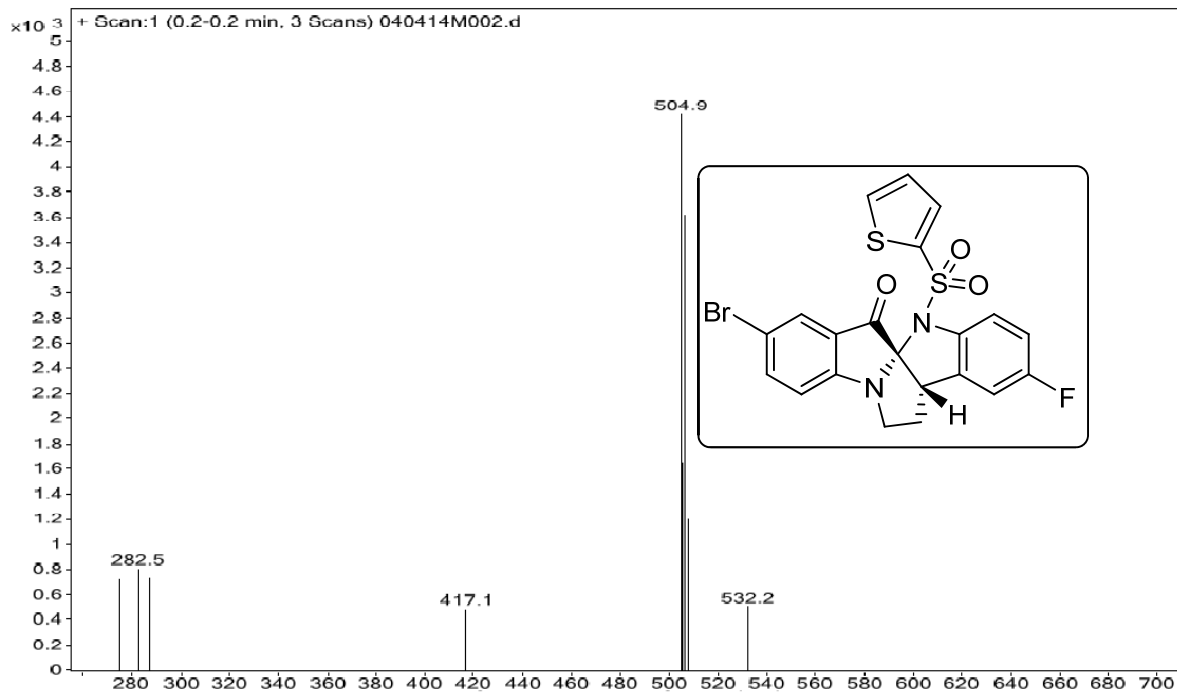

Mass spectra of compound **2i**

3-175\_140408175223 #14-54 RT: 0.05-0.19 AV: 41 NL: 7.79E6  
T: FTMS (1,1) + p ESI Full ms [100.00-2000.00]

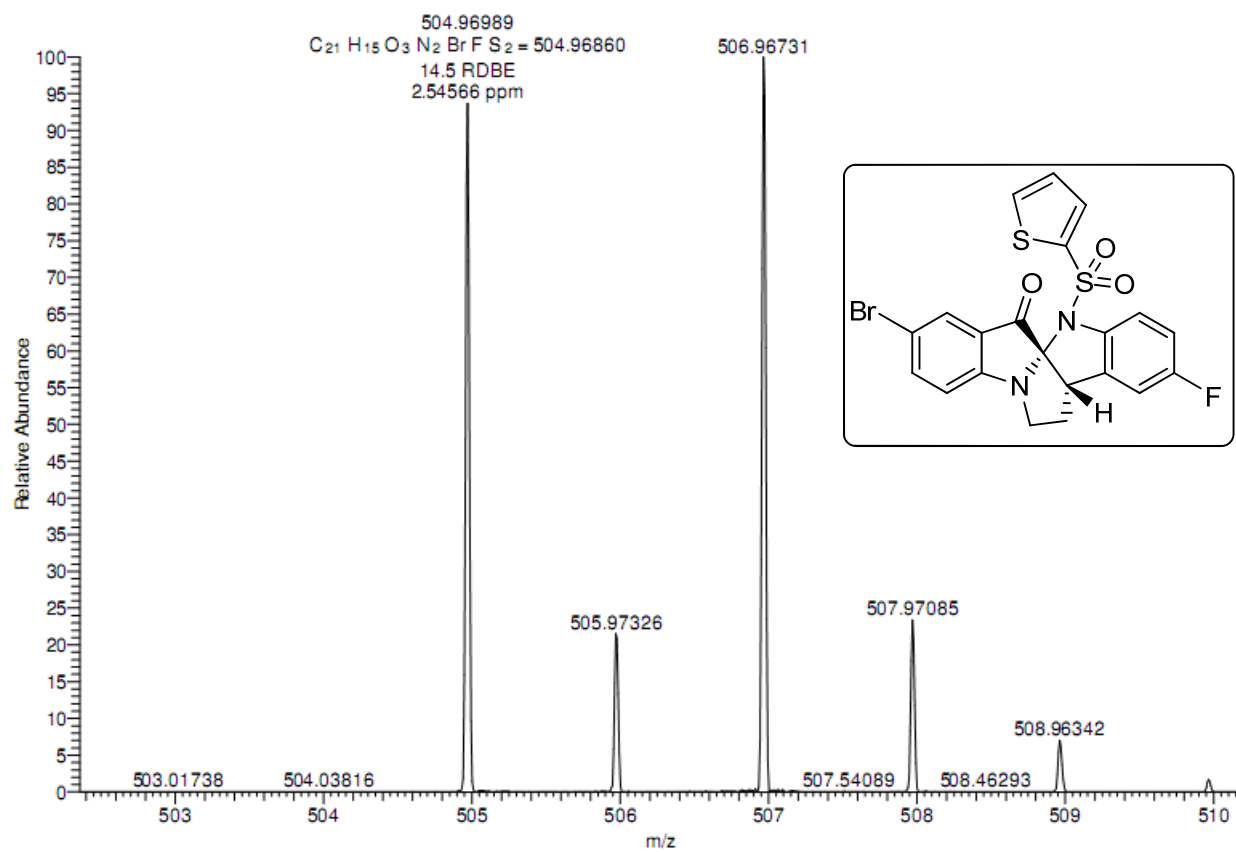

HRMS of compound **2i**

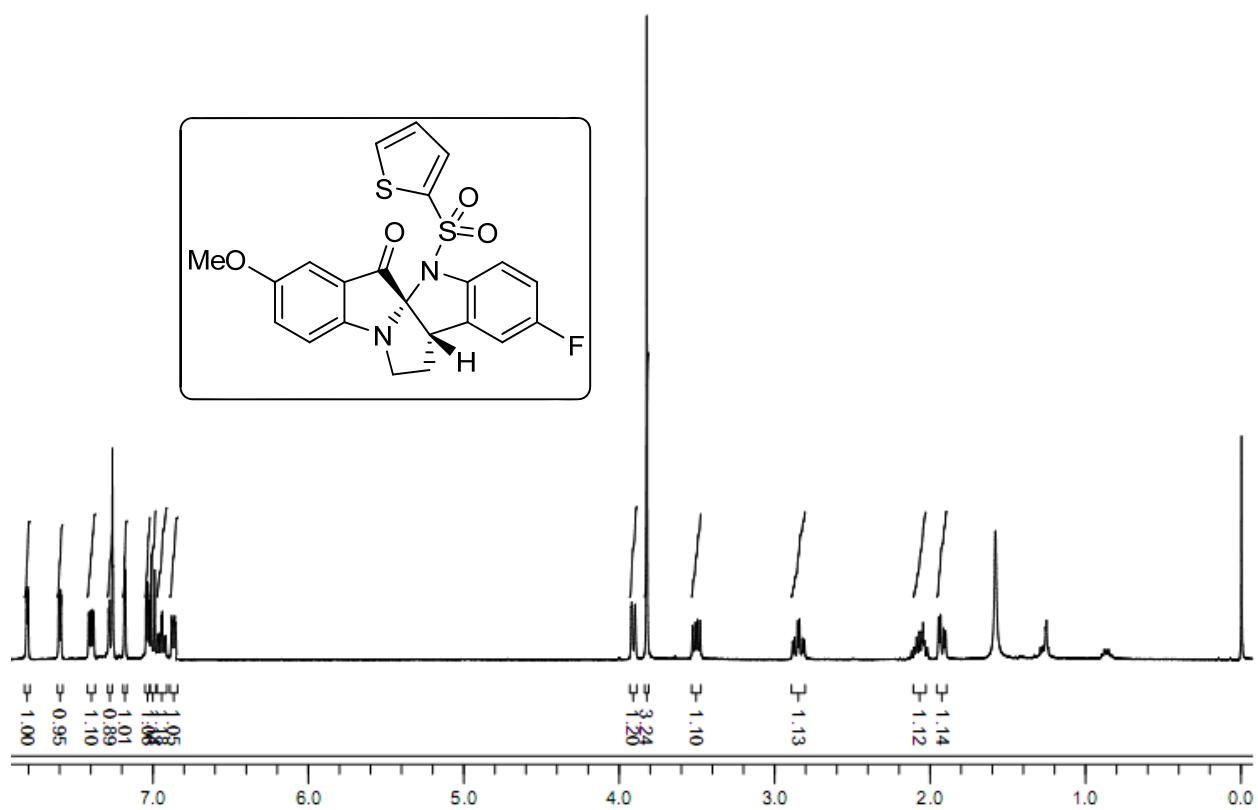

$^1\text{H}$  NMR (Varian, 400 MHz) spectrum of compound **2j** in  $\text{CDCl}_3$

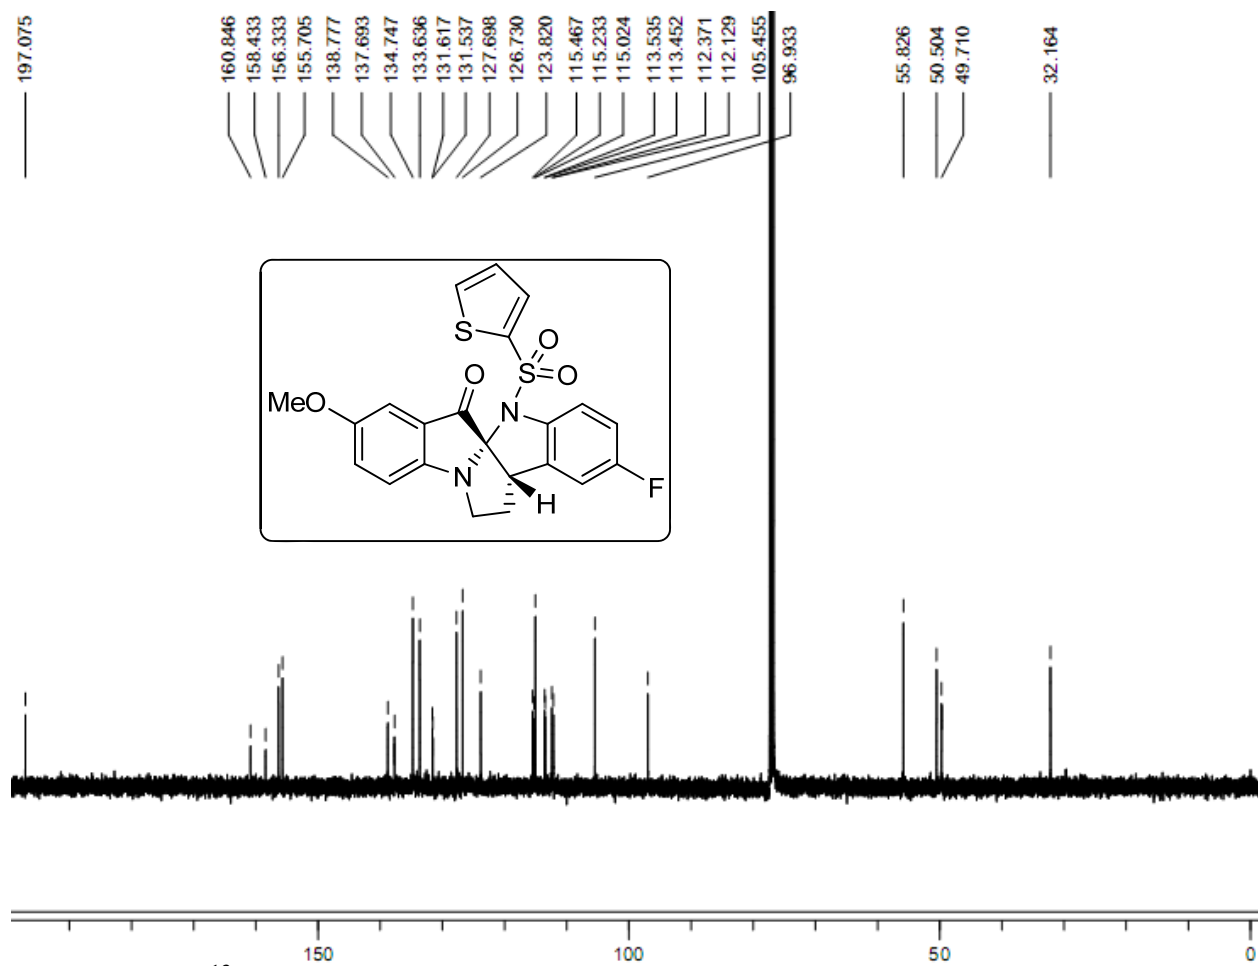

$^{13}\text{C}$  NMR spectrum (Varian, 100 MHz) of compound **2j** in  $\text{CDCl}_3$

# HPLC of compound 2j

CPRI @ DRILS  
HPLC ANALYSIS REPORT

Injection Date : Fri, 7. Feb. 2014 Seq Line : 3  
Sample Name : ILS-BPS-3-172 Location : Vial 5  
Acq Operator : RADHA Inj. No. : 1  
Acq. Method : D:\chem32\1\DATA\070214-ILS 2014-02-07 13-14-49\C-18-> Inj. Vol. : 10 µl  
Analysis Method : D:\CHEM32\_002\1\METHODS\C-18 A80B20GS.M  
Method Info : Column : Symmetry C-18 75\*4.6mm,3.5µm  
Mobile phase: A) 0.1% HCOOH in Water , B) ACN  
T/B%:0/20,0.5/20,4/98,10/98,10.5/20,12/20  
Flow: 1.0 ml/min, Diluent: ACN:Water(80:20)

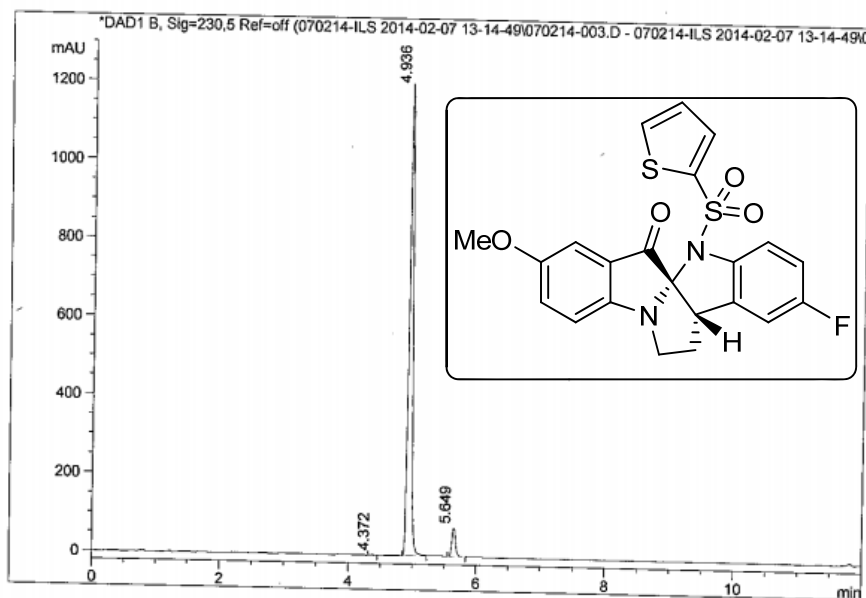

Signal 1: DAD1 B, Sig=230,5 Ref=off

| Peak # | RT [min] | Area     | Area % |
|--------|----------|----------|--------|
| 1      | 4.372    | 5.081    | 0.100  |
| 2      | 4.936    | 4799.861 | 94.264 |
| 3      | 5.649    | 286.973  | 5.636  |

\*\*\* End of Report \*\*\*

|               |               |             |         |                 |              |                        |                     |
|---------------|---------------|-------------|---------|-----------------|--------------|------------------------|---------------------|
| Sample Name   | ILS-BPS-3-172 | Position    | Vial 64 | Instrument Name | Instrument 1 | User Name              |                     |
| Inj Vol       | 0.5           | InjPosition |         | SampleType      | Sample       | IRM Calibration Status | Not Applicable      |
| Data Filename | 07021M012.d   | ACQ Method  | test.m  | Comment         |              | Acquired Time          | 2/7/2014 2:56:45 PM |

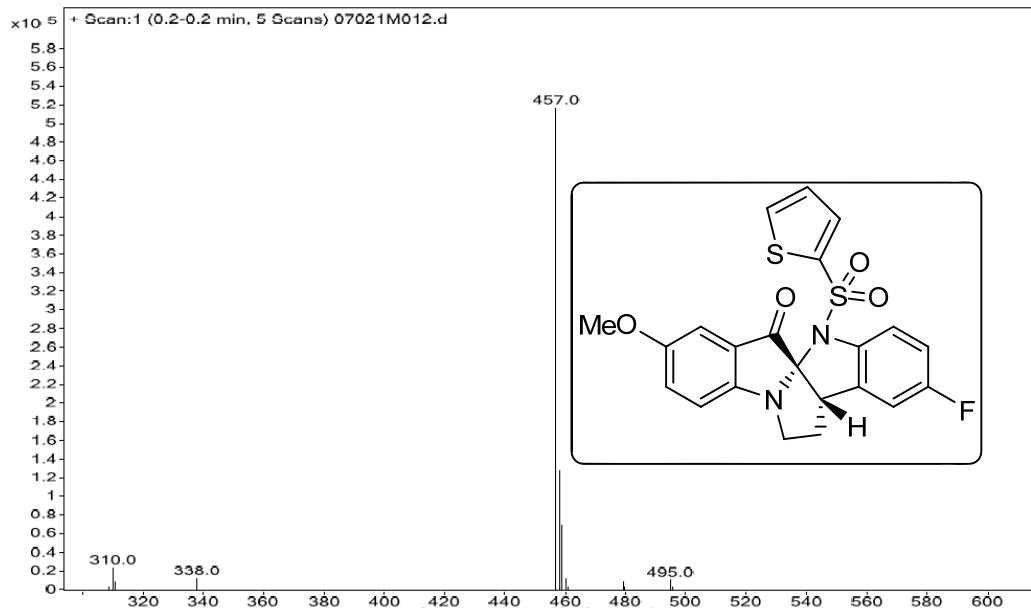

Mass spectra of compound **2j**



3-172\_140408174715 #8-58 RT: 0.03-0.20 AV: 51 NL: 1.58E7  
T: FTMS (1,1) + p ESI Full ms [100.00-2000.00]

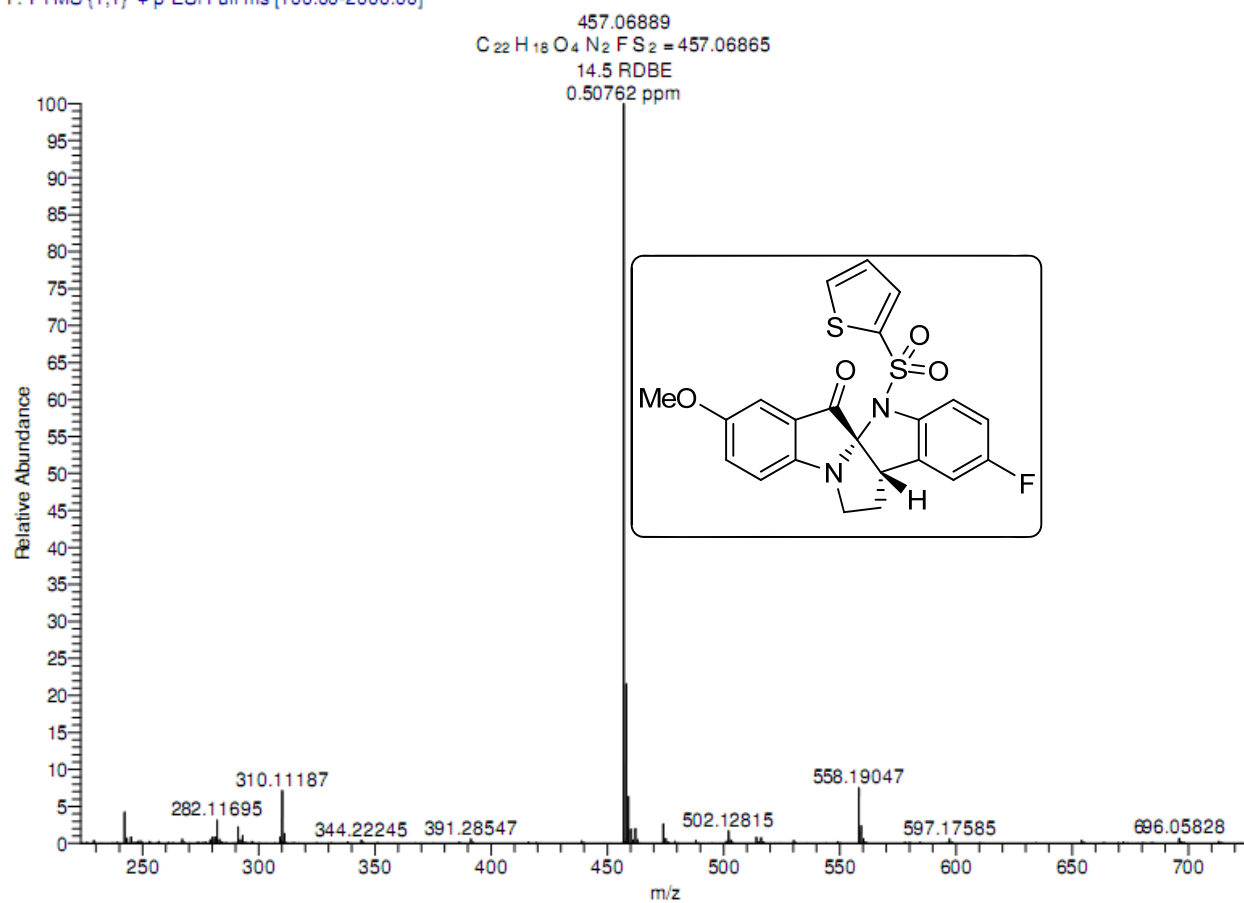

HRMS of compound **2j**

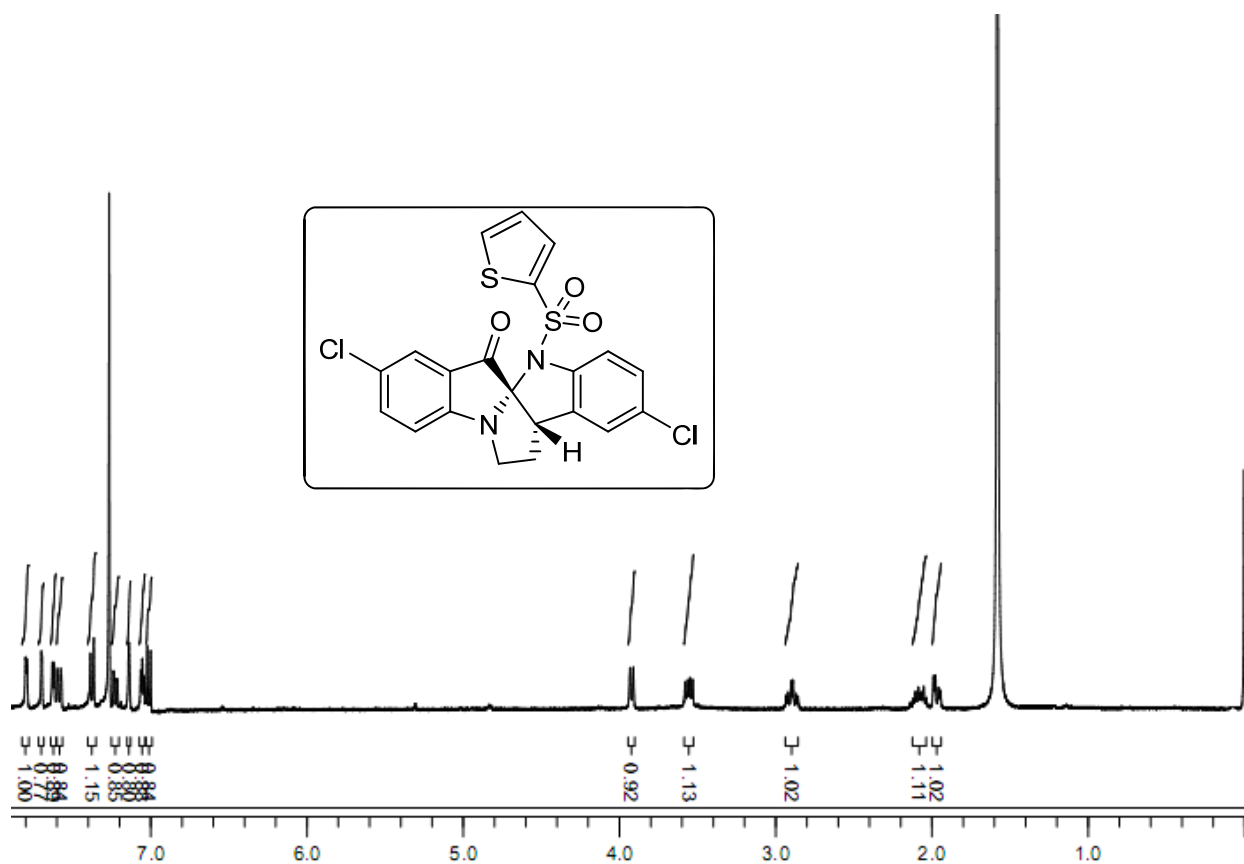

$^1\text{H}$  NMR (Varian, 400 MHz) spectrum of compound **2k** in  $\text{CDCl}_3$

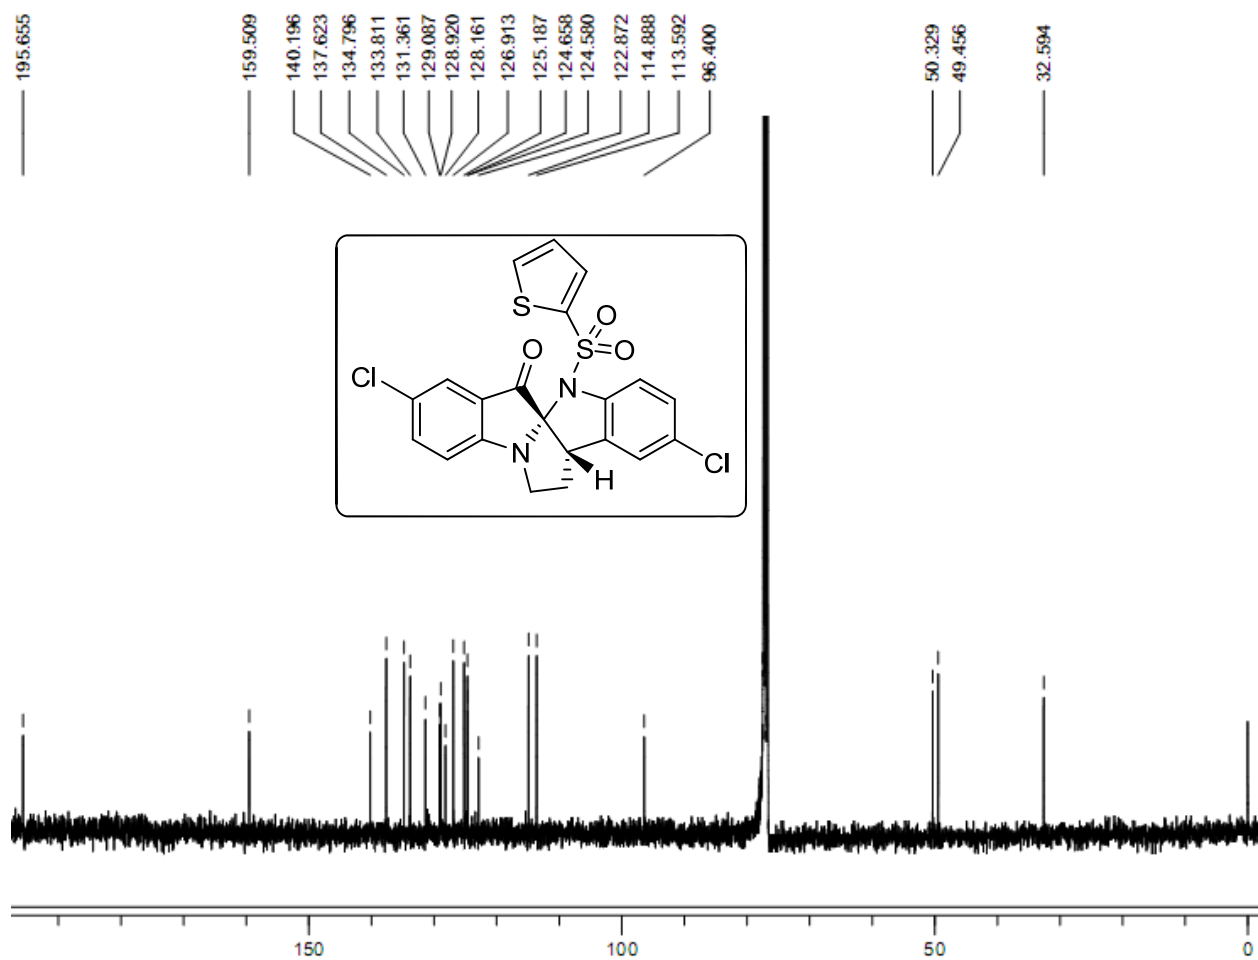

<sup>13</sup>C NMR spectrum (Varian, 100 MHz) of compound **2k** in CDCl<sub>3</sub>

HPLC of compound **2k**

# SAMPLE INFORMATION

|                   |                          |                     |                               |
|-------------------|--------------------------|---------------------|-------------------------------|
| Sample Name:      | ILS-BPS-3-173            | Sample Set Name:    | 240214                        |
| Sample Type:      | Unknown                  | Acq. Method Set:    | METHOD                        |
| Vial:             | 49                       | Processing Method:  | METHOD PRO                    |
| Injection #:      | 1                        | Channel Name:       | 230.0nm                       |
| Injection Volume: | 5.00 ul                  | Proc. Chnl. Descr.: | PDA 230.0 nm Blank Subtracted |
| Run Time:         | 12.0 Minutes             |                     |                               |
| Date Acquired:    | 2/24/2014 1:38:48 PM IST |                     |                               |
| Date Processed:   | 2/24/2014 2:14:20 PM IST |                     |                               |

Column: SYMMETRY C-18 75\*4.6mm 3.5µm  
 Mobile phase: A) 0.1% FA in water B) ACN  
 T/%B: 0/20, 0.5/20, 4/98, 10/98, 10.5/20, 12/20  
 Flow: 1.0 ml /min, Diluent: ACN: WATER (80:20)

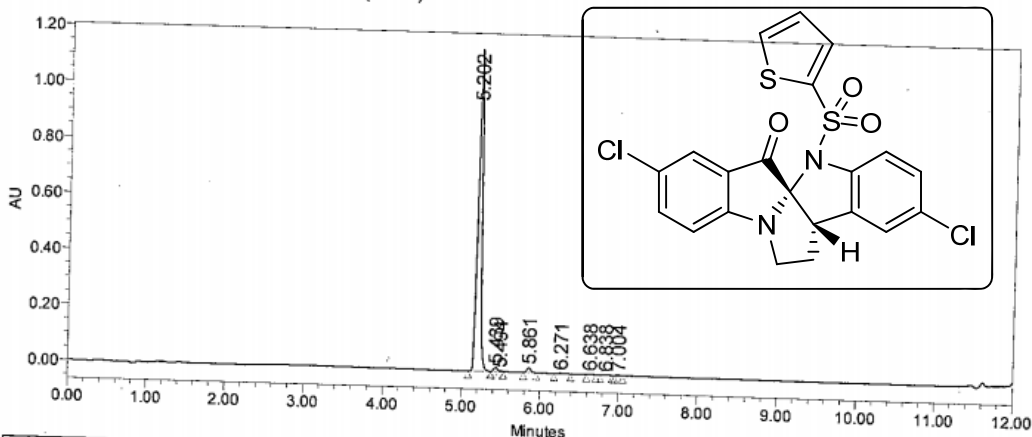

|   | RT    | Area    | % Area | Height  |
|---|-------|---------|--------|---------|
| 1 | 5.202 | 3935070 | 96.52  | 1149119 |
| 2 | 5.439 | 46820   | 1.15   | 14753   |
| 3 | 5.494 | 3874    | 0.10   | 2005    |
| 4 | 5.861 | 53377   | 1.31   | 17312   |
| 5 | 6.271 | 11931   | 0.29   | 2116    |
| 6 | 6.638 | 9319    | 0.23   | 2658    |
| 7 | 6.838 | 10427   | 0.26   | 2364    |
| 8 | 7.004 | 6112    | 0.15   | 1886    |

Analysed By *[Signature]* 24.02.14

|               |               |             |        |                 |              |                        |                      |
|---------------|---------------|-------------|--------|-----------------|--------------|------------------------|----------------------|
| Sample Name   | ILS-BPS-3-173 | Position    | Vial 9 | Instrument Name | Instrument 1 | User Name              |                      |
| Inj Vol       | 0.5           | InjPosition |        | SampleType      | Sample       | IRM Calibration Status | Not Applicable       |
| Data Filename | 240114M004.d  | ACQ Method  | test.m | Comment         |              | Acquired Time          | 2/24/2014 2:15:03 PM |

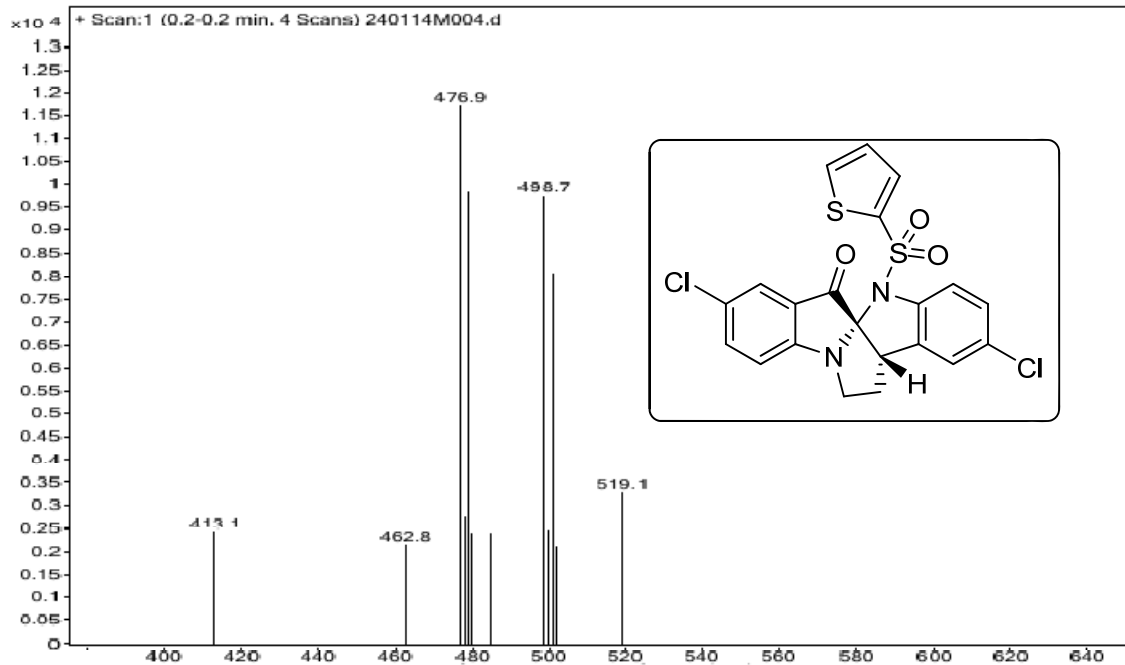

Mass spectra of compound **2k**

3-173\_140408174950 #31 RT: 0.11 AV: 1 NL: 1.99E6

1: FTMS (1,1) + p ESI Full ms [100.00-2000.00]

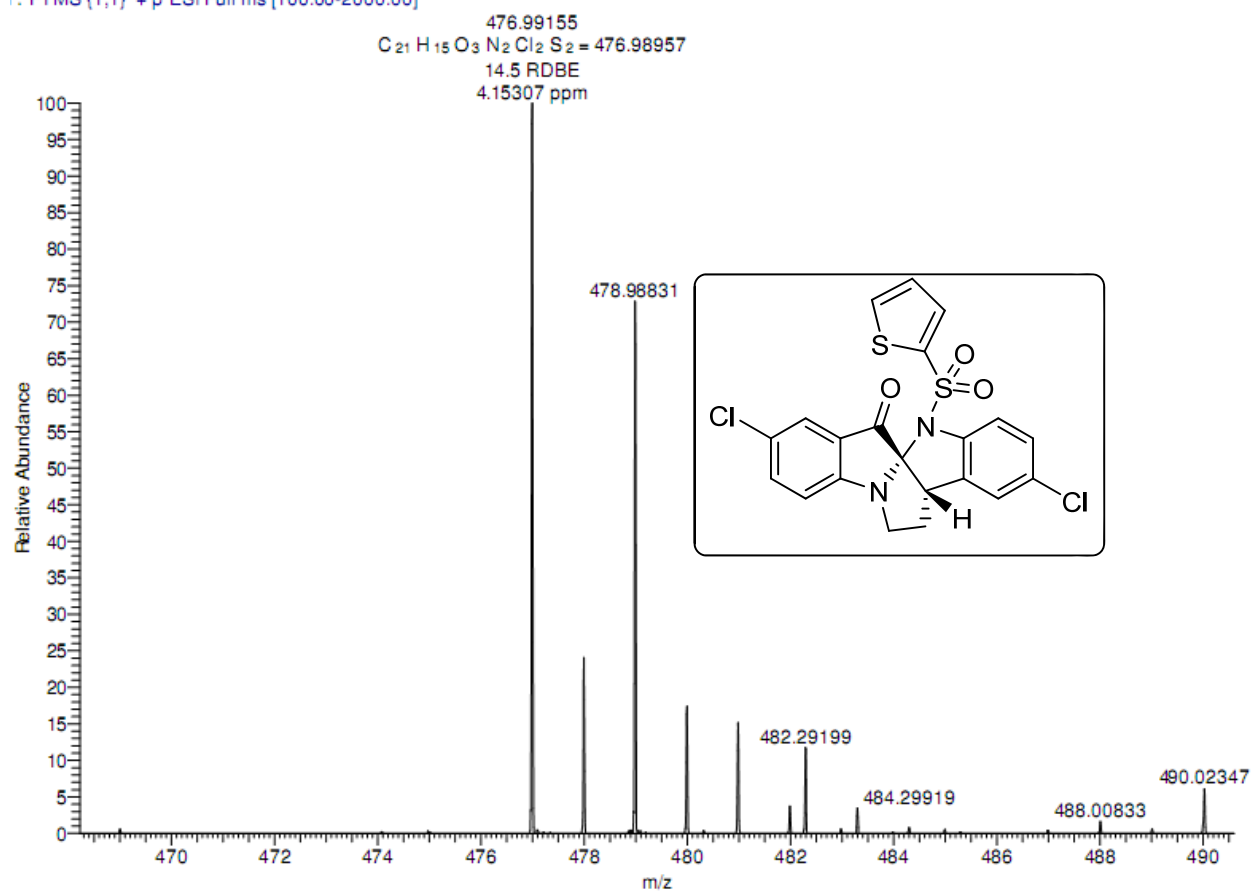

HRMS of compound **2k**

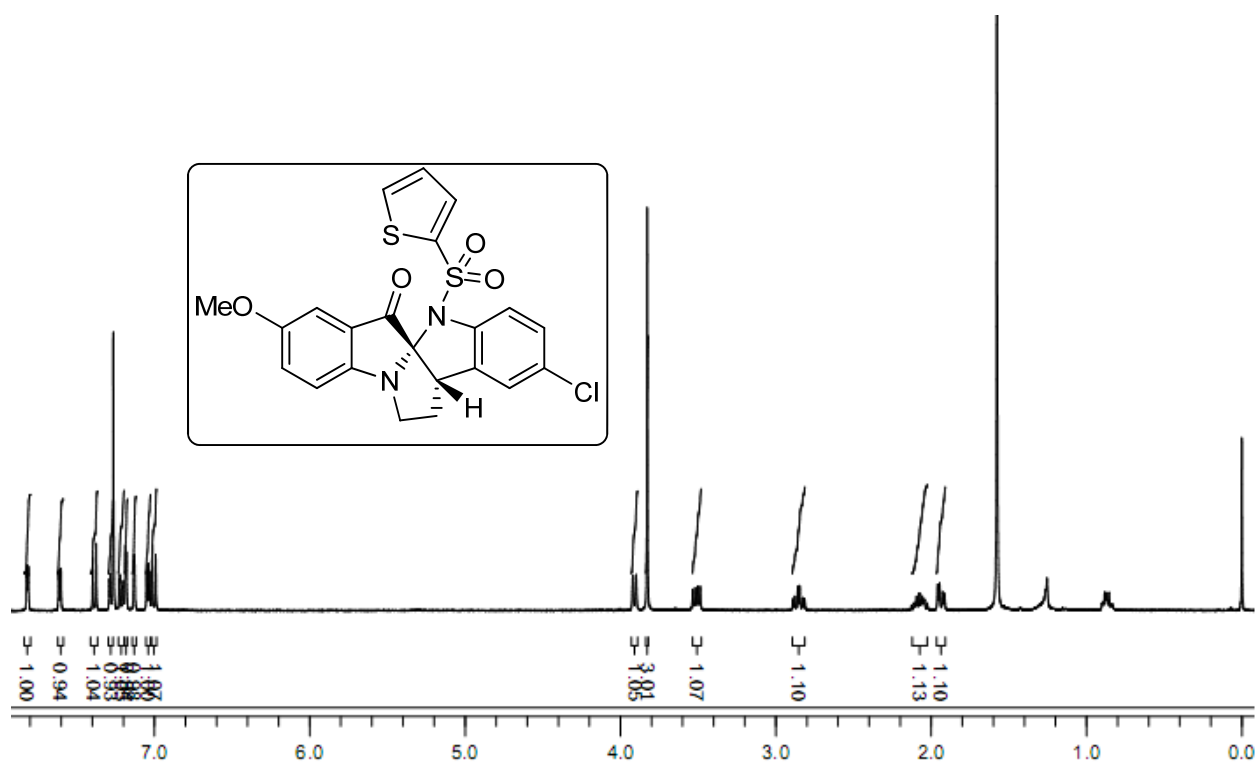

$^1\text{H}$  NMR (Varian, 400 MHz) spectrum of compound **2l** in  $\text{CDCl}_3$

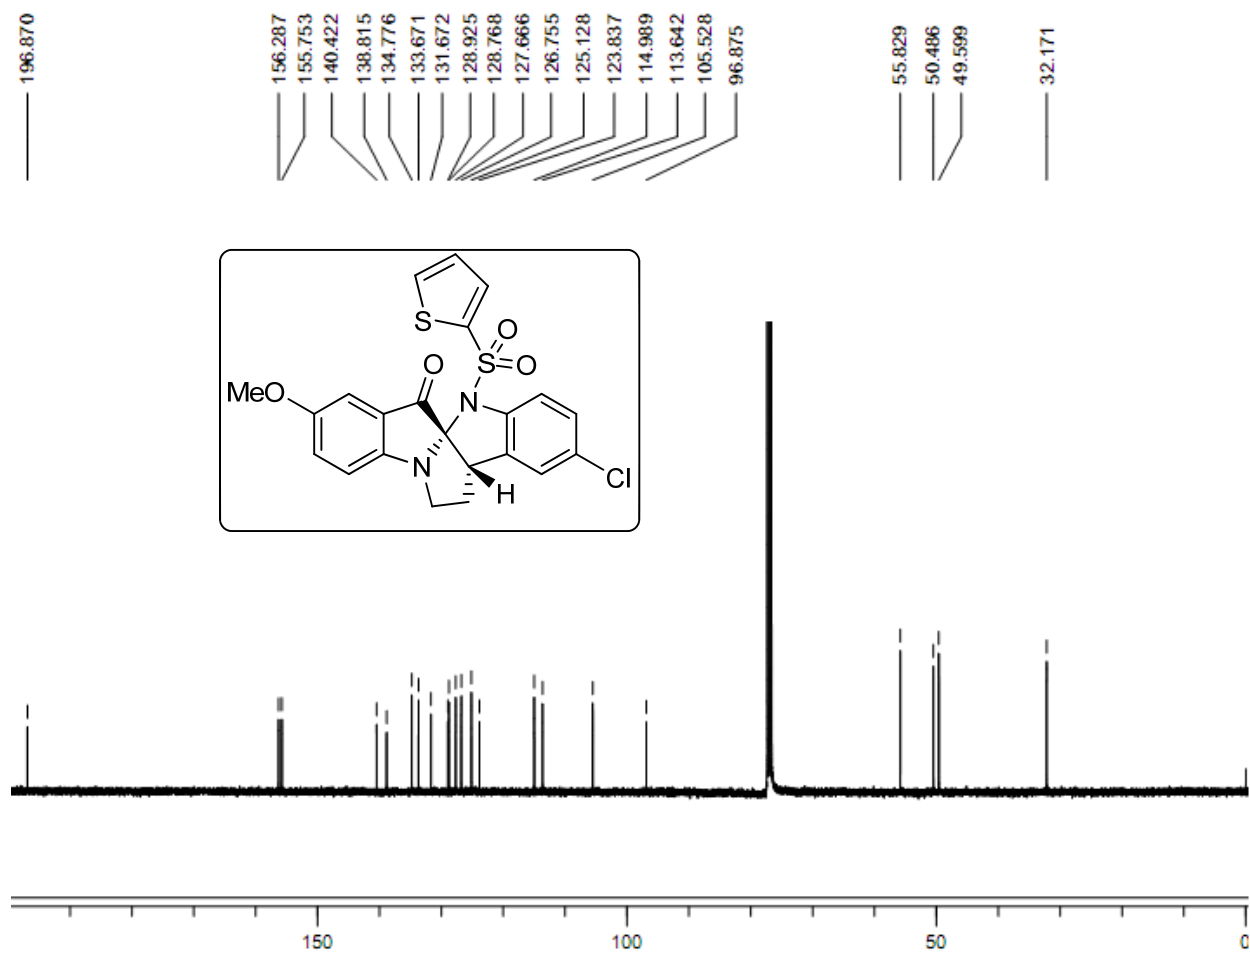

$^{13}\text{C}$  NMR spectrum (Varian, 100 MHz) of compound **21** in  $\text{CDCl}_3$



# HPLC of compound 2l

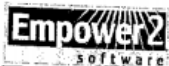

CPRI@DRILS

## SAMPLE INFORMATION

Sample Name: ILS-BPS-3-177  
 A.R Number: CM14D011  
 Vial: 22  
 Injection #: 1  
 Injection Volume: 5.00 ul  
 Run Time: 25.0 Minutes  
 Sample Set Name: 220414  
 Date Acquired: 4/22/2014 8:19:11 PM IST  
 Date Processed: 4/23/2014 9:29:14 AM IST

Acq operator: Vaishnavi  
 Acq. Method Set: SFV\_A5  
 Processing Method: SFV\_A5 PRO  
 Channel Name: 235.0nm  
 Proc. Chnl. Descr.: PDA 235.0 nm Blank Subtracted

Column: Symmetry C-18 75\*4.6mm 3.5um  
 Mobile phase: A) 0.1% TFA in water B) ACN  
 T/B: 0/20, 2/20, 10/95, 20/95, 22/20, 25/20  
 Flow: 1.0 ml /min, Diluent: ACN: WATER (80:20)

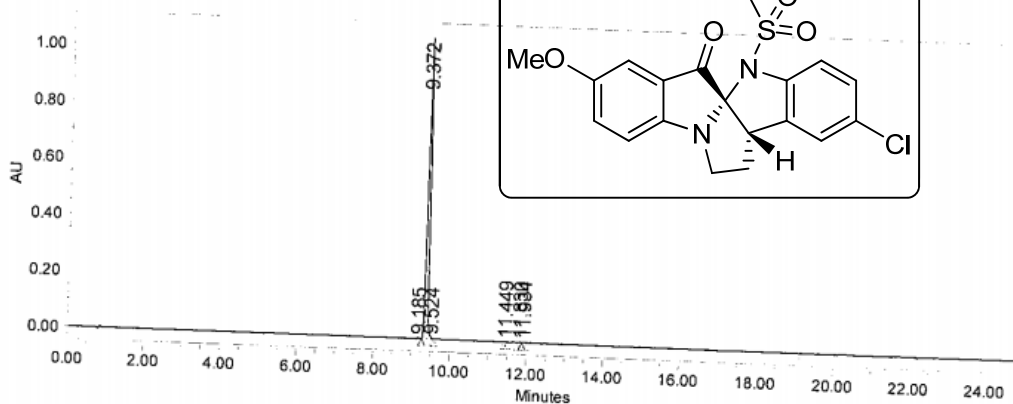

|   | RT     | Area    | % Area | Height  |
|---|--------|---------|--------|---------|
| 1 | 9.185  | 9136    | 0.22   | 2199    |
| 2 | 9.372  | 4100557 | 99.29  | 1059981 |
| 3 | 9.524  | 5187    | 0.13   | 3806    |
| 4 | 11.449 | 4995    | 0.12   | 1607    |
| 5 | 11.830 | 6085    | 0.15   | 1803    |
| 6 | 11.934 | 4036    | 0.10   | 1656    |

Analysed By

*Asil*  
23/04/14

Checked By

*R*  
23/04/14

Reported by User: System  
 Report Method: CPRI@DRILS  
 Report Method ID: 6580  
 Page: 1 of 1

Project Name: APRIL\_2014  
 Date Printed:  
 4/23/2014  
 10:03:43 AM Asia/Calcutta

|             |               |               |                      |               |              |                 |              |
|-------------|---------------|---------------|----------------------|---------------|--------------|-----------------|--------------|
| Sample Name | ILS-BPS-3-177 | Position      | Vial 18              | Sample type   |              | Instrument Name | Instrument 1 |
| User Name   |               | Inj Vol       | 0.5                  | Data Filename | 250414M028.d | ACQ Method      | test.m       |
| AR NO :     | MA14D062      | Acquired Time | 4/25/2014 3:50:19 PM |               |              |                 |              |

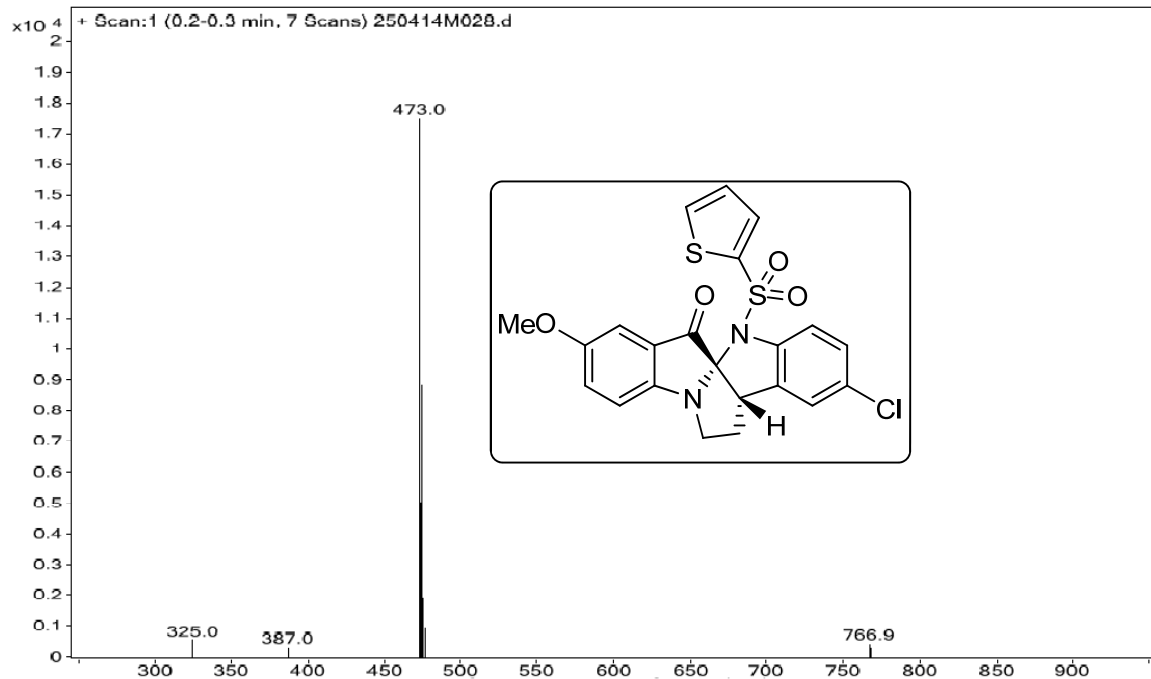

Mass spectra of compound **2I**

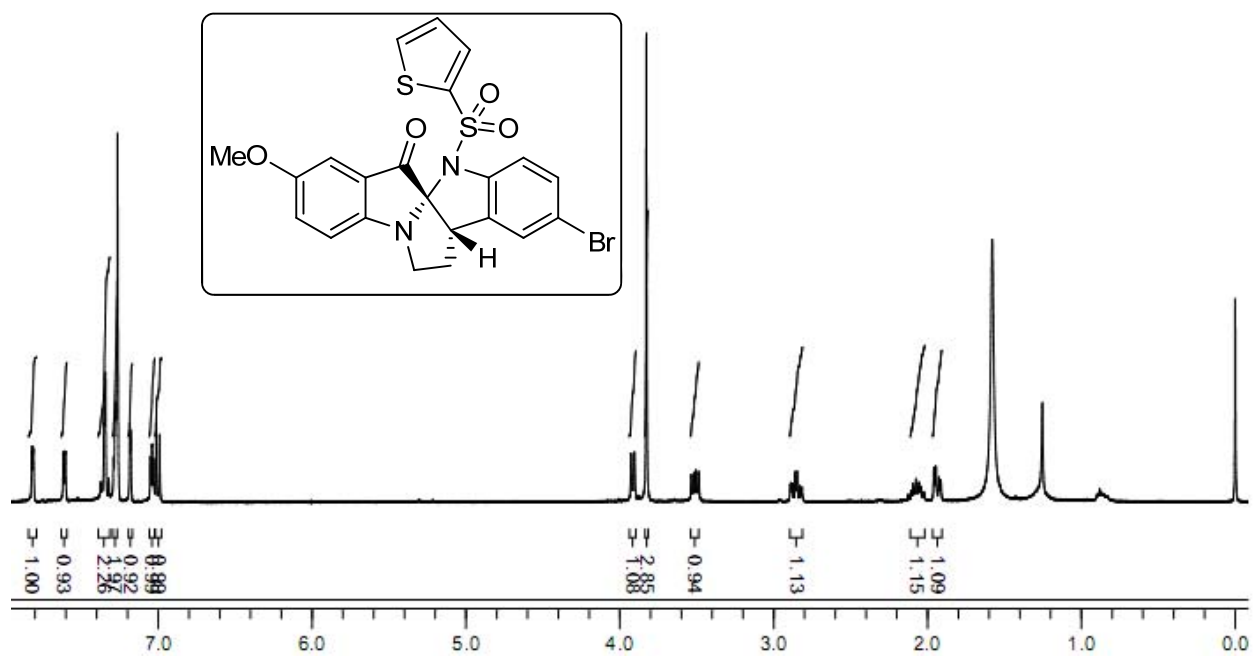

$^1\text{H}$  NMR (Varian, 400 MHz) spectrum of compound **2m** in  $\text{CDCl}_3$

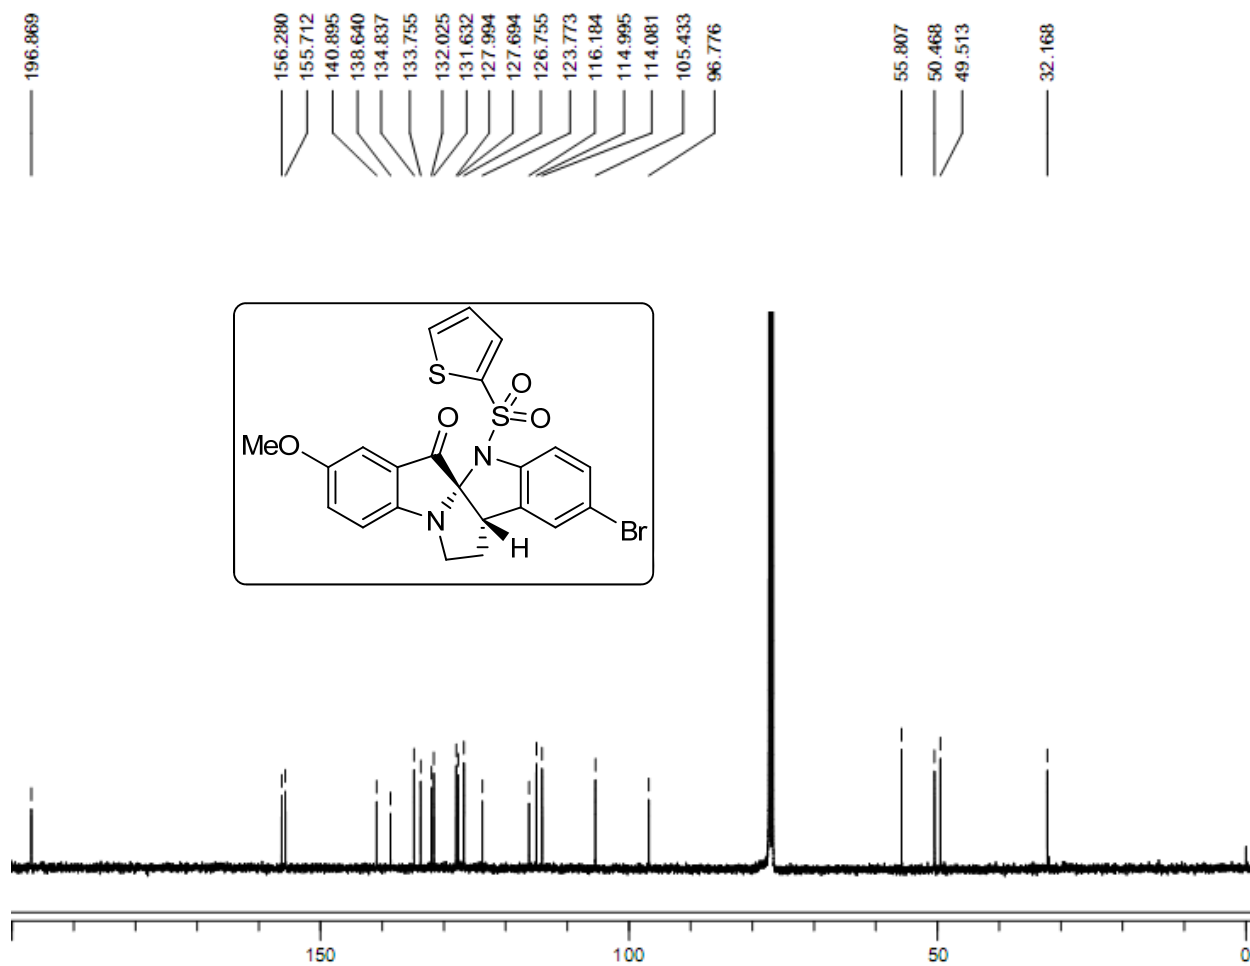

<sup>13</sup>C NMR spectrum (Varian, 100 MHz) of compound **2m** in CDCl<sub>3</sub>

# HPLC of compound 2m

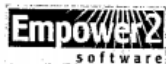

CPRI@DRILS

## SAMPLE INFORMATION

|                   |                           |                     |                               |
|-------------------|---------------------------|---------------------|-------------------------------|
| Sample Name:      | ILS-BPS-3-176             | Acq operator:       | Vaishnavi                     |
| A.R Number:       | CM14D016                  | Acq. Method Set:    | SFV_A5                        |
| Vial:             | 5                         | Processing Method:  | SFV_A5 PRO                    |
| Injection #:      | 1                         | Channel Name:       | 235.0nm                       |
| Injection Volume: | 5.00 ul                   | Proc. Chnl. Descr.: | PDA 235.0 nm Blank Subtracted |
| Run Time:         | 25.0 Minutes              |                     |                               |
| Sample Set Name:  | 250414_1                  |                     |                               |
| Date Acquired:    | 4/25/2014 6:47:45 PM IST  |                     |                               |
| Date Processed:   | 4/26/2014 10:23:08 AM IST |                     |                               |

Column: Symmetry C-18 75\*4.6mm 3.5µm  
 Mobile phase: A) 0.1% TFA in water B) ACN  
 T/%B: 0/20, 2/20, 10/95, 20/95, 22/20, 25/20  
 Flow: 1.0 ml/min, Diluent: ACN: WATER (80:20)

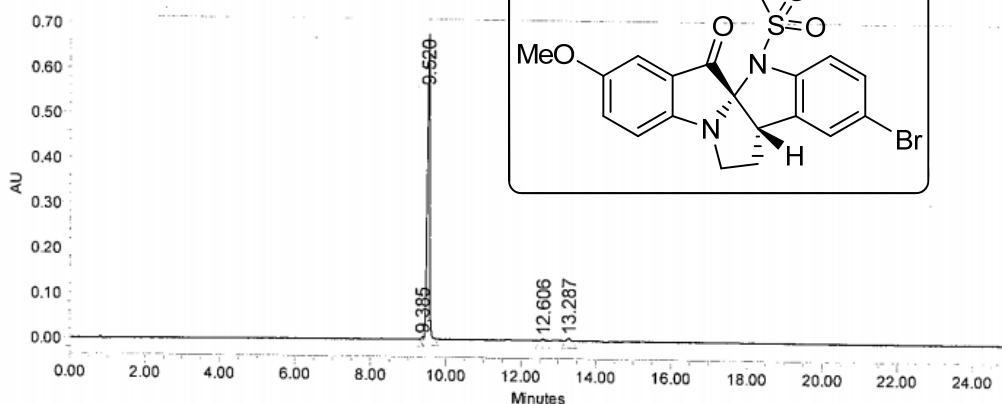

|   | RT     | Area    | % Area | Height |
|---|--------|---------|--------|--------|
| 1 | 9.385  | 17153   | 0.58   | 4945   |
| 2 | 9.520  | 2900511 | 97.53  | 674925 |
| 3 | 12.606 | 22960   | 0.77   | 4009   |
| 4 | 13.287 | 33329   | 1.12   | 6188   |

Analysed By  
*Chait*  
 26/04/14

Checked By  
*ph*  
 26/04/14

Reported by User: System  
 Report Method: CPRI@DRILS  
 Report Method ID: 7305  
 Page: 1 of 1

Project Name: APRIL\_2014  
 Date Printed:  
 4/26/2014  
 10:23:18 AM Asia/Calcutta

|             |               |               |                      |               |              |                 |              |
|-------------|---------------|---------------|----------------------|---------------|--------------|-----------------|--------------|
| Sample Name | ILS-BPS-3-176 | Position      | Vial 43              | Sample type   |              | Instrument Name | Instrument 1 |
| User Name   |               | Inj Vol       | 0.5                  | Data Filename | 240414M042.d | ACQ Method      | test.m       |
| AR NO :     | MM14D048      | Acquired Time | 4/24/2014 5:21:53 PM |               |              |                 |              |

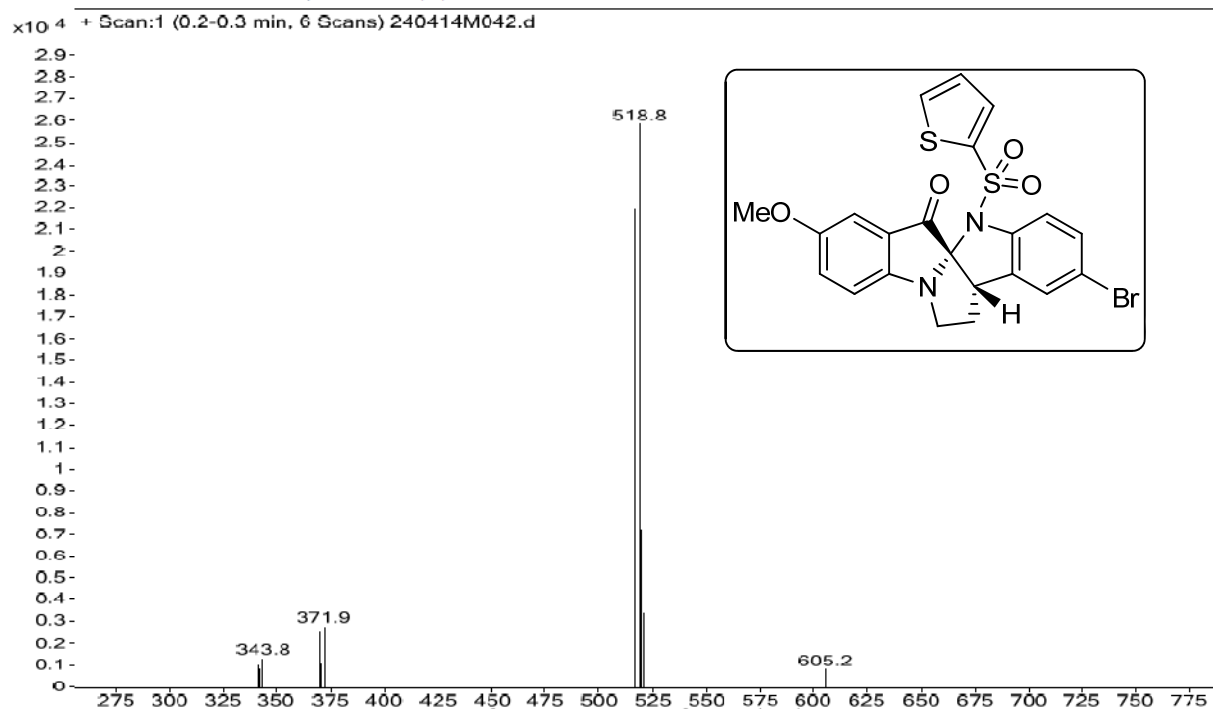

Mass spectra of compound **2m**

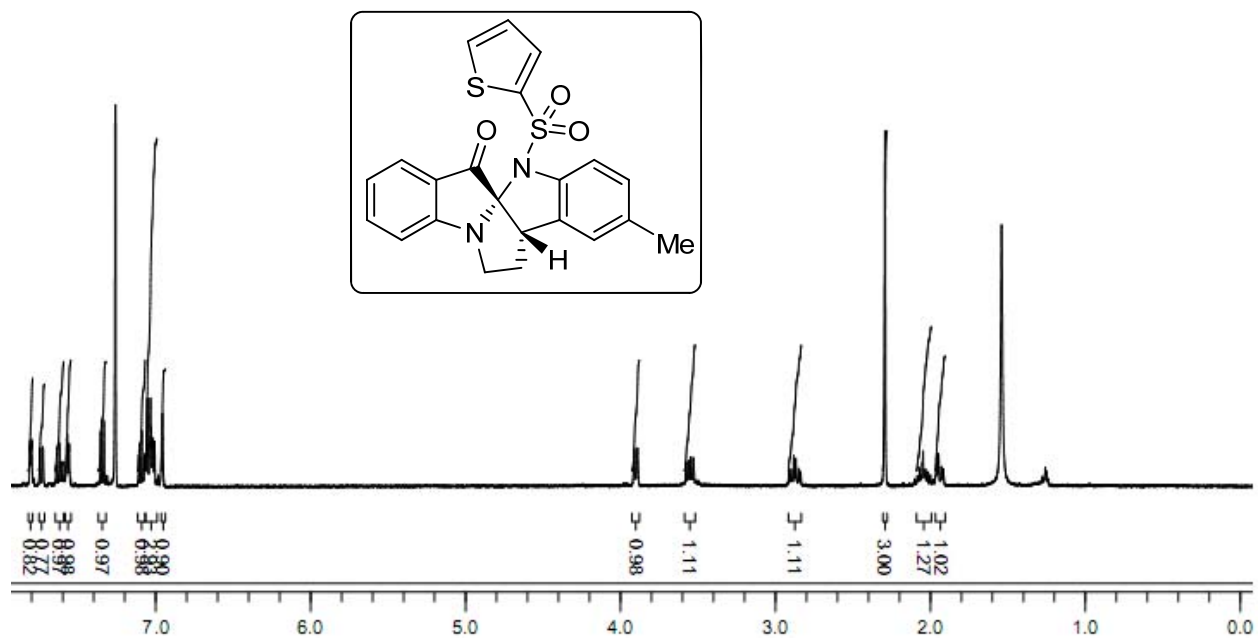

$^1\text{H}$  NMR (Varian, 400 MHz) spectrum of compound **2n** in  $\text{CDCl}_3$

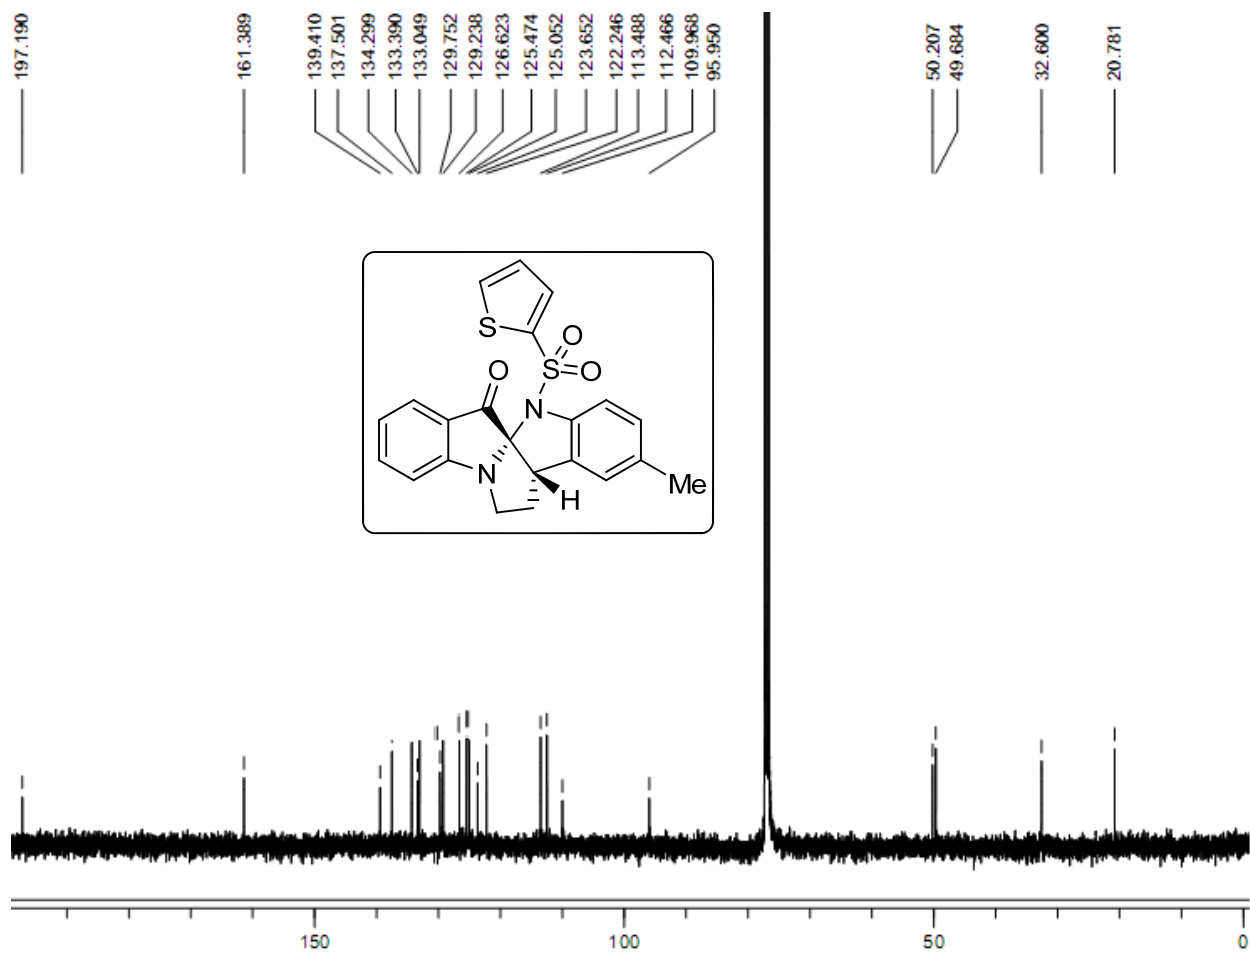

<sup>13</sup>C NMR spectrum (Varian, 100 MHz) of compound **2n** in CDCl<sub>3</sub>



# HPLC of compound 2n

COSMIC DISCOVERIES @ ILS  
HPLC ANALYSIS REPORT

Injection Date : Fri, 8. Mar. 2013      Seq Line : 4  
Sample Name : ILS-BPS-3-73      Location : Vial 14  
Acq Operator : VARMA      Inj. No. : 1  
Acq. Method : D:\Chem32\1\DATA\080313-MC 2013-03-08 12-41-06\C-18 ->      Inj. Vol. : 5 µl  
Analysis Method : D:\CHEM32\1\METHODS\C-18 A80B20GM.M  
Method Info : Column:Symmetry C-18 75\*4.6mm,3.5µ  
Mobile phase: A) 0.1% HCOOH in water,B) ACN (GRADIENT) T/  
B%:0/20,0.5/20,4/98,10/98,10.5/20,12/20  
Flow:1.0 ml/min Diluent: ACN:Water(80:20)

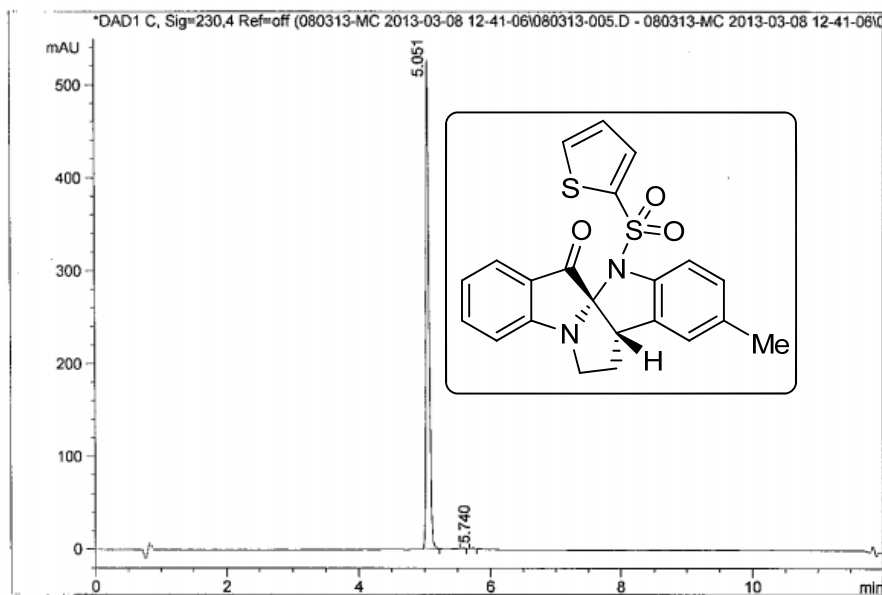

Signal 1: DAD1 C, Sig=230,4 Ref=off

| Peak # | RT [min] | Area     | Area % |
|--------|----------|----------|--------|
| 1      | 5.051    | 1686.874 | 99.697 |
| 2      | 5.590    | 2.637    | 0.156  |
| 3      | 5.740    | 2.483    | 0.147  |

*basis*  
*08/03/13*

\*\*\* End of Report \*\*\*

|               |              |             |         |                 |              |                        |                     |
|---------------|--------------|-------------|---------|-----------------|--------------|------------------------|---------------------|
| Sample Name   | ILS/BPS/3-73 | Position    | Vial 27 | Instrument Name | Instrument 1 | User Name              |                     |
| Inj Vol       | 1            | InjPosition |         | SampleType      | Sample       | IRM Calibration Status | Not Applicable      |
| Data Filename | 070313M030.d | ACQ Method  | ILS.m   | Comment         |              | Acquired time          | 3/7/2013 1:07:24 PM |

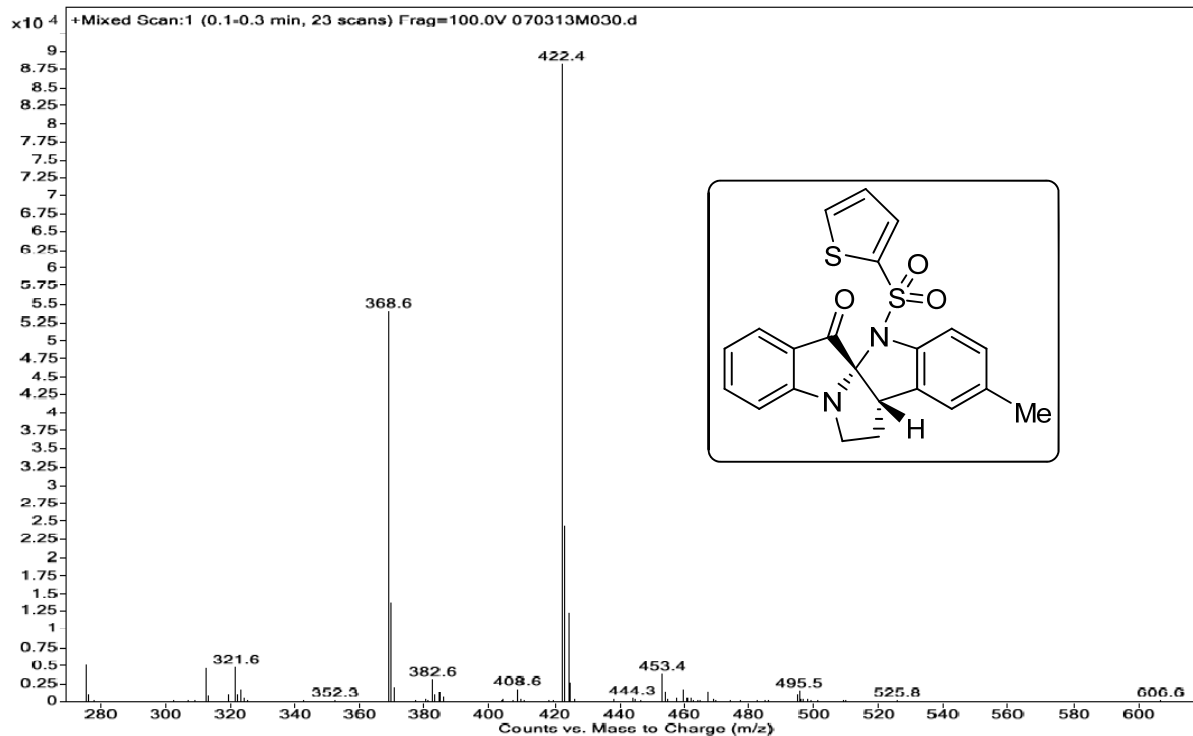

Mass spectra of compound **2n**

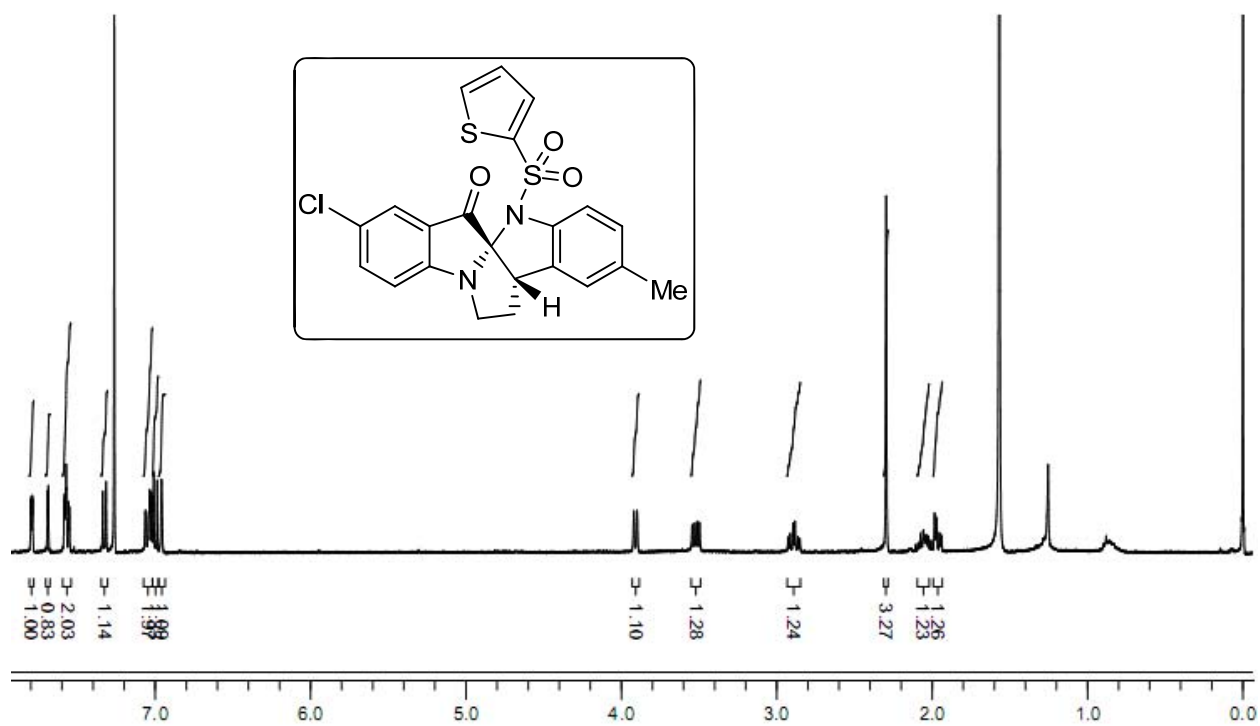

$^1\text{H}$  NMR (Varian, 400 MHz) spectrum of compound **2o** in  $\text{CDCl}_3$

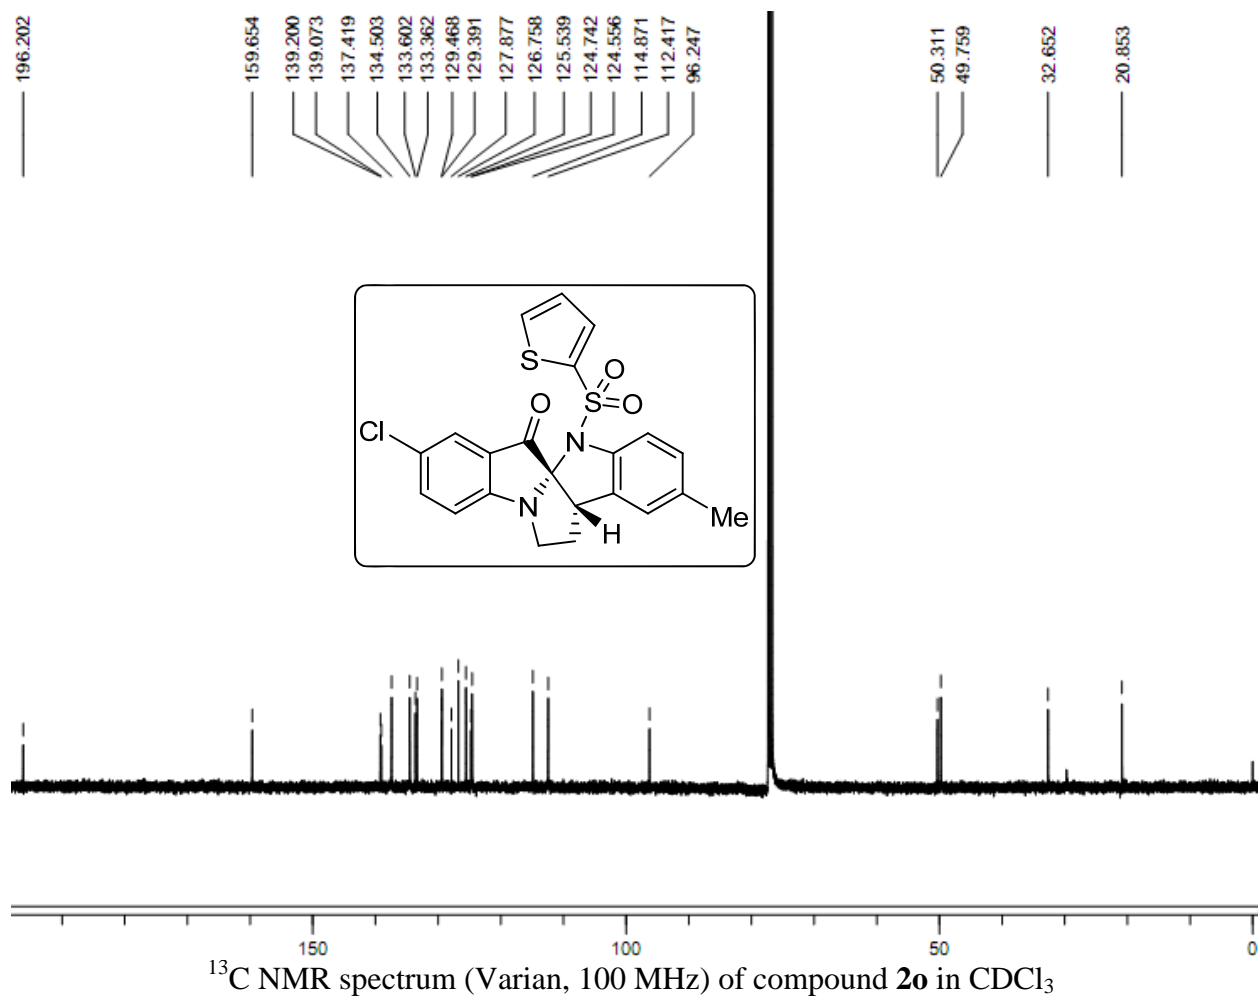

CPRI @ DRILS  
HPLC ANALYSIS REPORT

|                 |                                               |           |   |        |
|-----------------|-----------------------------------------------|-----------|---|--------|
| Injection Date  | : Mon, 10. Feb. 2014                          | Seq Line  | : | 0      |
| Sample Name     | : ILS-BPS-3-171                               | Location  | : | Vial 1 |
| Acq Operator    | : RADHA                                       | Inj. No.  | : | 0      |
| Acq. Method     | : D:\CHEM32_002\1\METHODS\C-18 A80B20GS.M     | Inj. Vol. | : | 15 µl  |
| Analysis Method | : D:\CHEM32_002\1\METHODS\C-18 A80B20GS.M     |           |   |        |
| Method Info     | : Column : Symmetry C-18 75*4.6mm, 3.5µm      |           |   |        |
|                 | Mobile phase: A) 0.1% HCOOH in Water , B) ACN |           |   |        |
|                 | T/B%:0/20,0.5/20,4/98,10/98,10.5/20,12/20     |           |   |        |
|                 | Flow: 1.0 ml/min, Diluent: ACN:Water(80:20)   |           |   |        |

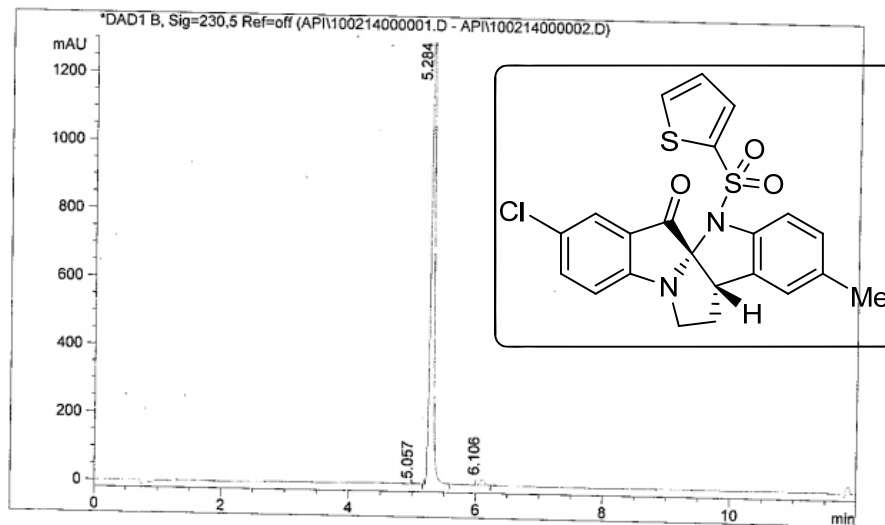

Signal 1: DAD1 B, Sig=230,5 Ref=off

| Peak<br># | RT<br>[min] | Area     | Area % |
|-----------|-------------|----------|--------|
| 1         | 5.057       | 6.209    | 0.110  |
| 2         | 5.284       | 5550.146 | 98.465 |
| 3         | 6.106       | 80.288   | 1.424  |

\*\*\* End of Report \*\*\*

Page 1 of 1

|               |               |             |        |                 |              |                        |                       |
|---------------|---------------|-------------|--------|-----------------|--------------|------------------------|-----------------------|
| Sample Name   | ILS-BPS-3-171 | Position    | Vial 6 | Instrument Name | Instrument 1 | User Name              |                       |
| Inj Vol       | 0.5           | InjPosition |        | SampleType      | Sample       | IRM Calibration Status | Not Applicable        |
| Data Filename | 100214M006.d  | ACQ Method  | test.m | Comment         |              | Acquired Time          | 2/10/2014 12:53:47 PM |

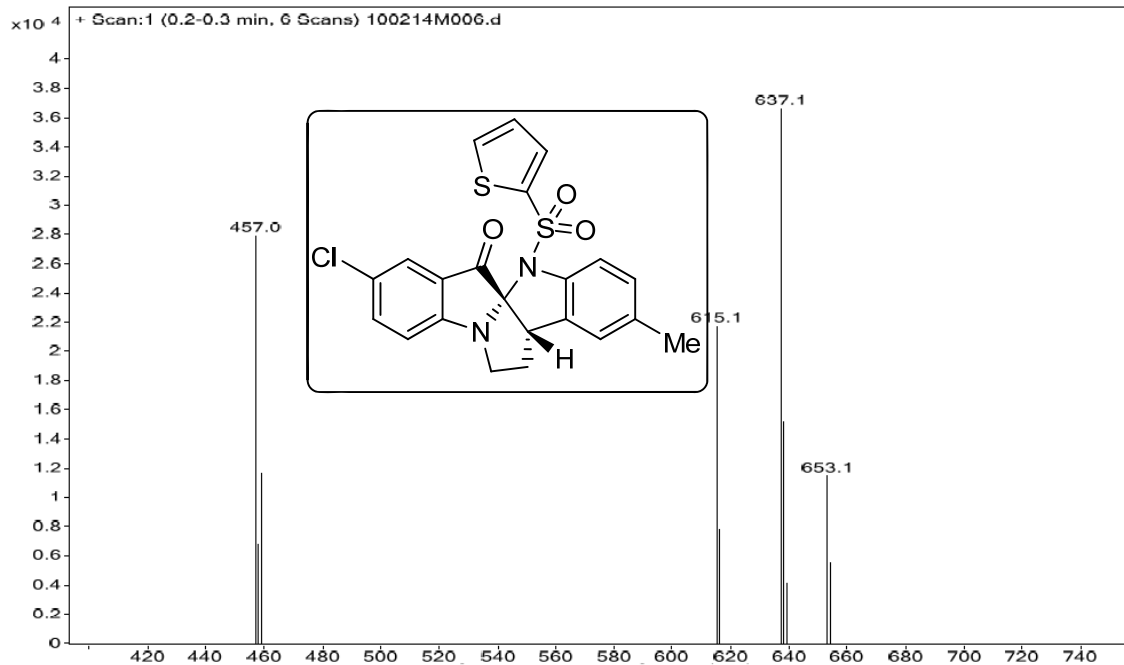

Mass spectra of compound **2o**

3-171\_140408174441 #13-63 RT: 0.05-0.22 AV: 51 NL: 1.01E7  
Γ: FTMS (1,1) + p ESI Full ms [100.00-2000.00]

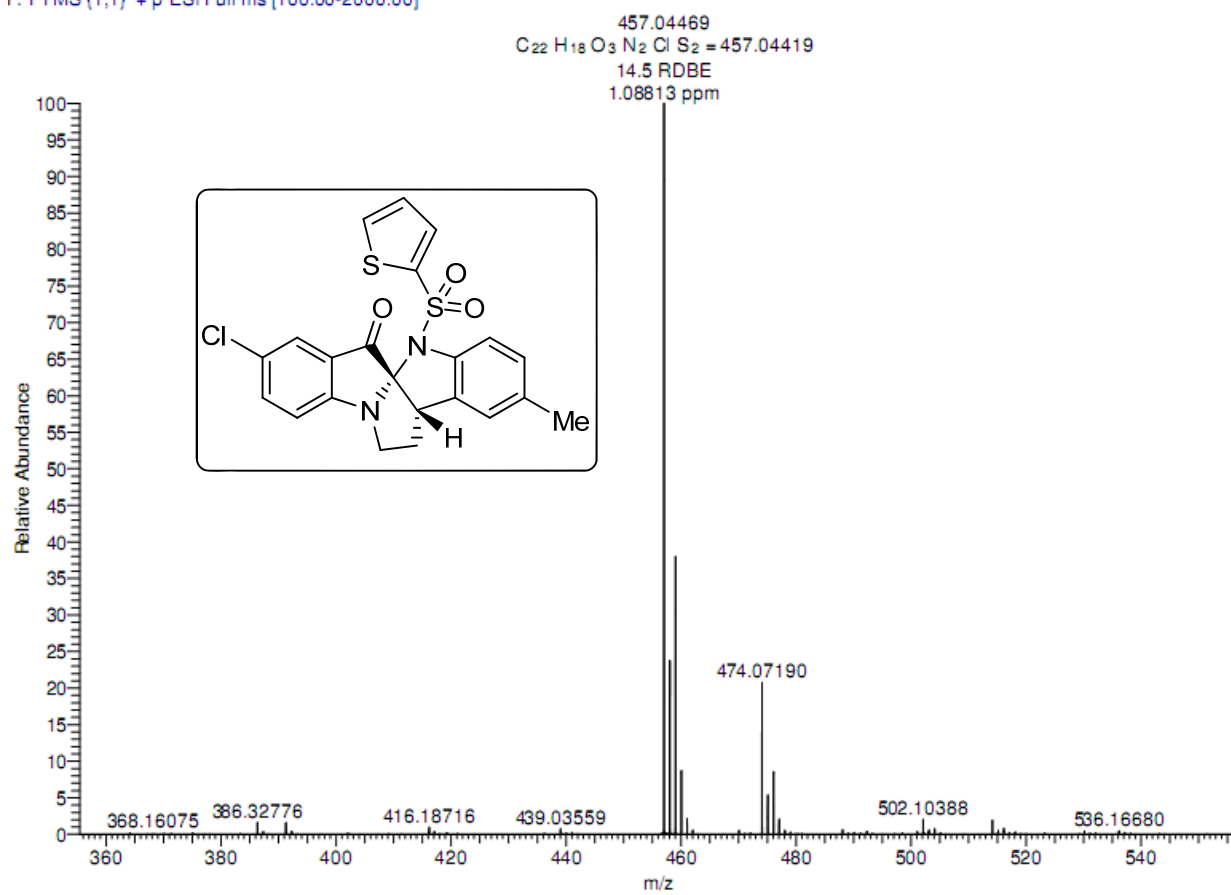

HRMS of compound **2o**

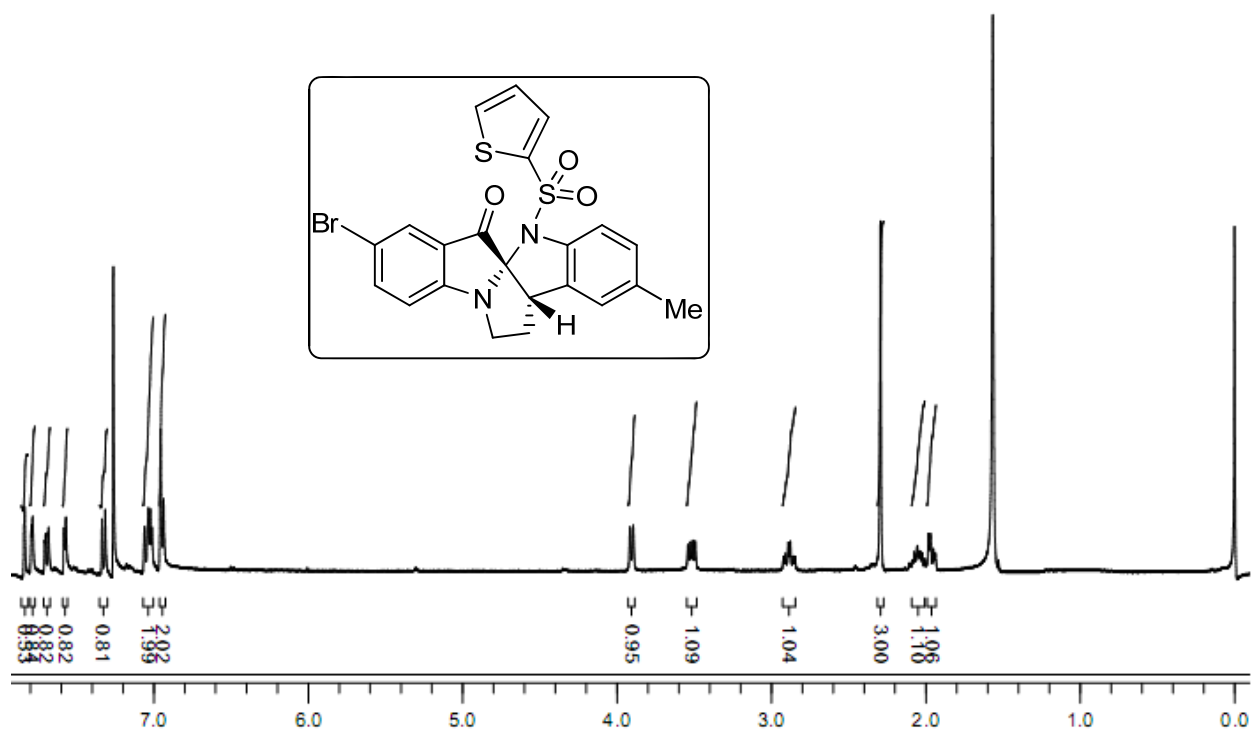

$^1\text{H}$  NMR (Varian, 400 MHz) spectrum of compound **2p** in  $\text{CDCl}_3$



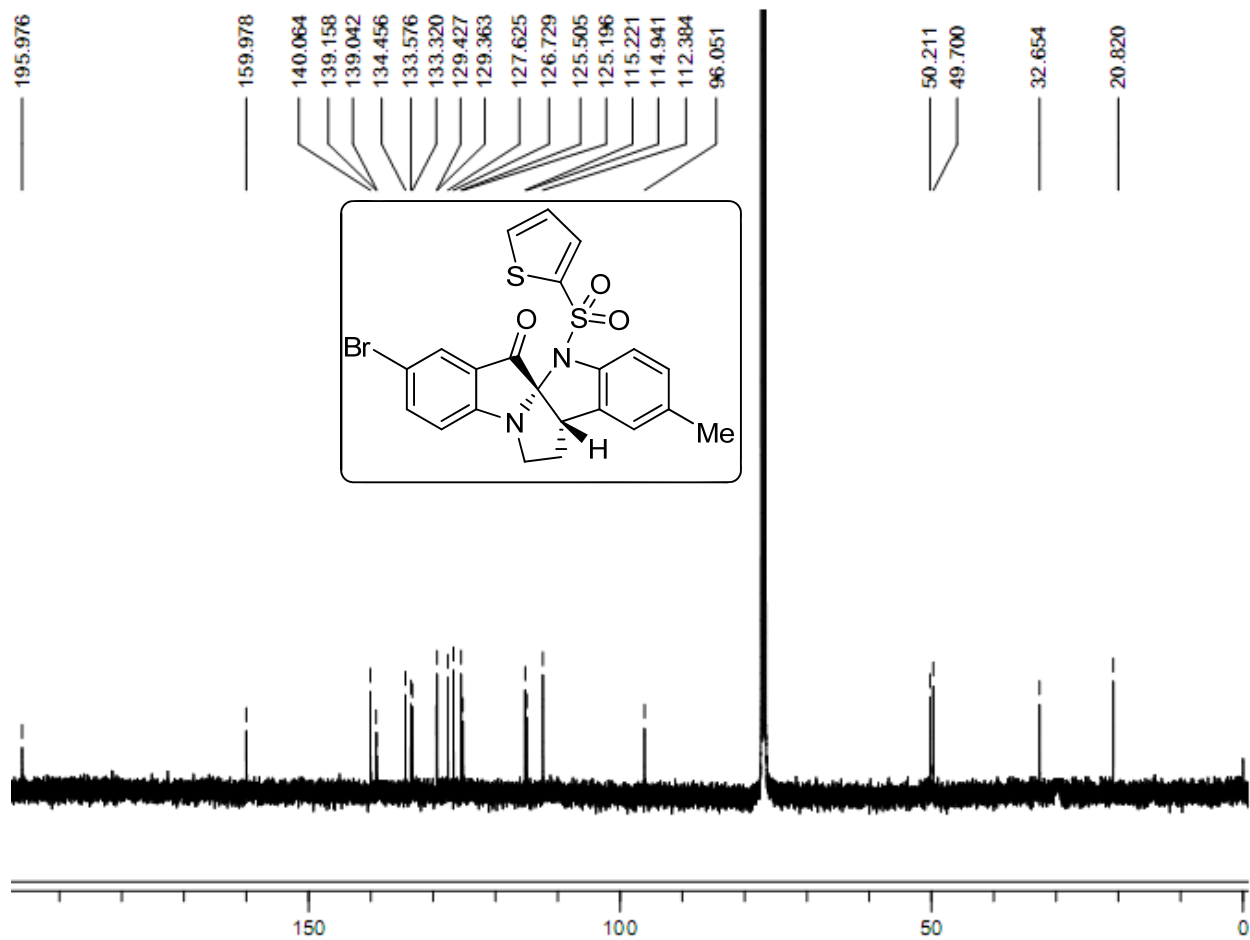

<sup>13</sup>C NMR spectrum (Varian, 100 MHz) of compound **2p** in CDCl<sub>3</sub>

# HPLC of compound 2p

CPRI @ DRILS  
HPLC ANALYSIS REPORT

Inj Date : Mon, 14. Apr. 2014 Acq Operator: SHASHIDHAR  
Sample Name : ILS-BPS-3-174 Vial 3  
A.R Number : CM14D008 -> Inj. Vol. : 10µL  
Acq. Method : D:\CHEM32\_002\1\METHODS\C-18 A80B20.M  
Analysis Method : D:\CHEM32\_002\1\METHODS\C-18 A80B20.M  
Method Info : Column : Symmetry C-18 75\*4.6mm3.5µm  
Mobile phase: A) 0.1% TFA in water , B) ACN  
T/B% : 0/20,1/20,6/98,10/98,12/20,15/20.  
Flow: 1.0 ml/min Diluent: ACN:Water(80:20)

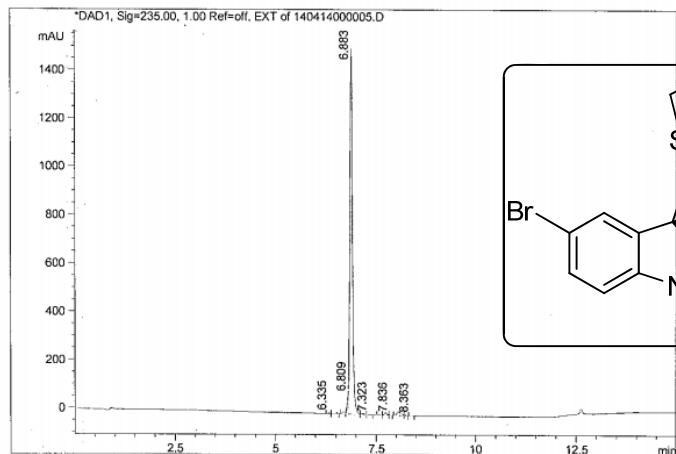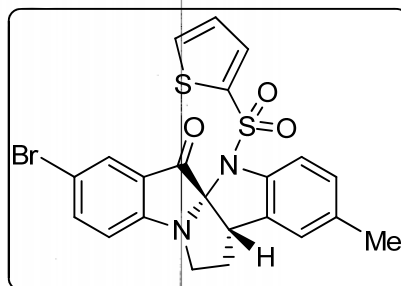

Signal 1: DAD1, Sig=235.00, 1.00 Ref=off, EXT

| Peak # | RT [min] | Area     | Area % |
|--------|----------|----------|--------|
| 1      | 6.335    | 9.078    | 0.128  |
| 2      | 6.464    | 193.773  | 2.727  |
| 3      | 6.684    | 29.836   | 0.420  |
| 4      | 6.809    | 178.952  | 0.518  |
| 5      | 6.883    | 6501.815 | 93.496 |
| 6      | 7.164    | 17.489   | 0.246  |
| 7      | 7.323    | 6.065    | 0.085  |
| 8      | 7.579    | 7.627    | 0.107  |
| 9      | 7.730    | 40.471   | 0.570  |
| 10     | 7.836    | 2.209    | 0.031  |
| 11     | 8.052    | 66.167   | 0.931  |

|             |               |               |                     |               |              |                 |              |
|-------------|---------------|---------------|---------------------|---------------|--------------|-----------------|--------------|
| Sample Name | ILS-BPS-3-174 | Position      | Vial 51             | Sample type   |              | Instrument Name | Instrument 1 |
| User Name   |               | Inj Vol       | 0.5                 | Data Filename | 090414M010.d | ACQ Method      | test.m       |
| AR NO :     | MM14D027      | Acquired Time | 4/9/2014 2:48:20 PM |               |              |                 |              |

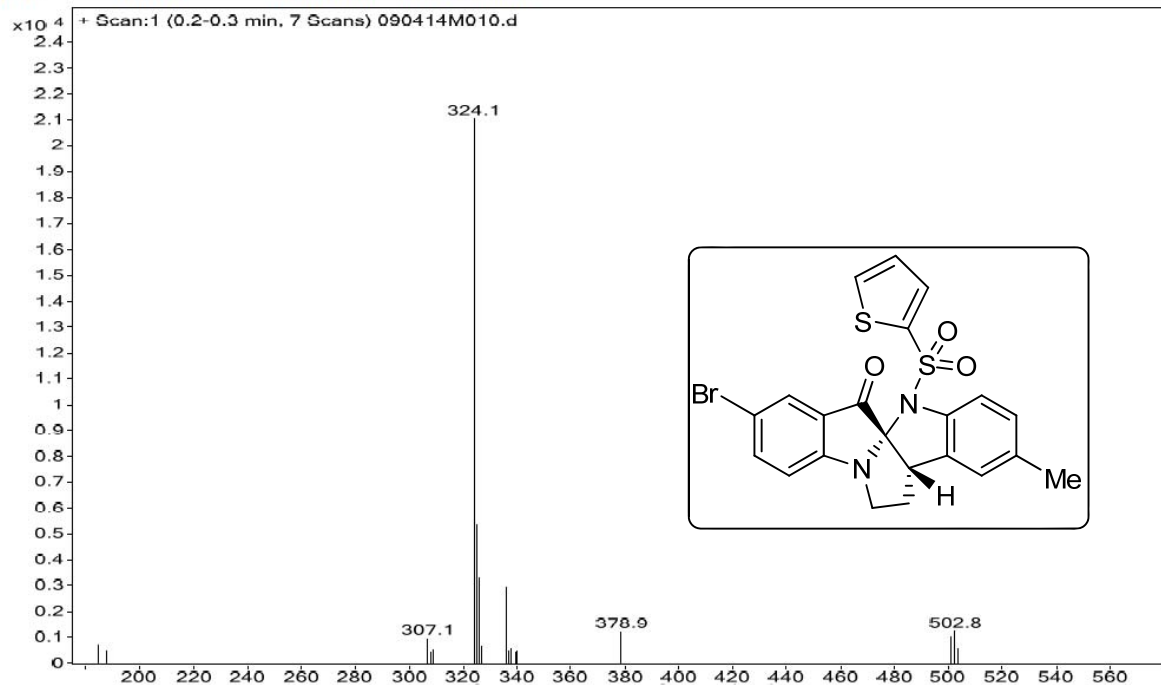

Mass spectra of compound **2p**

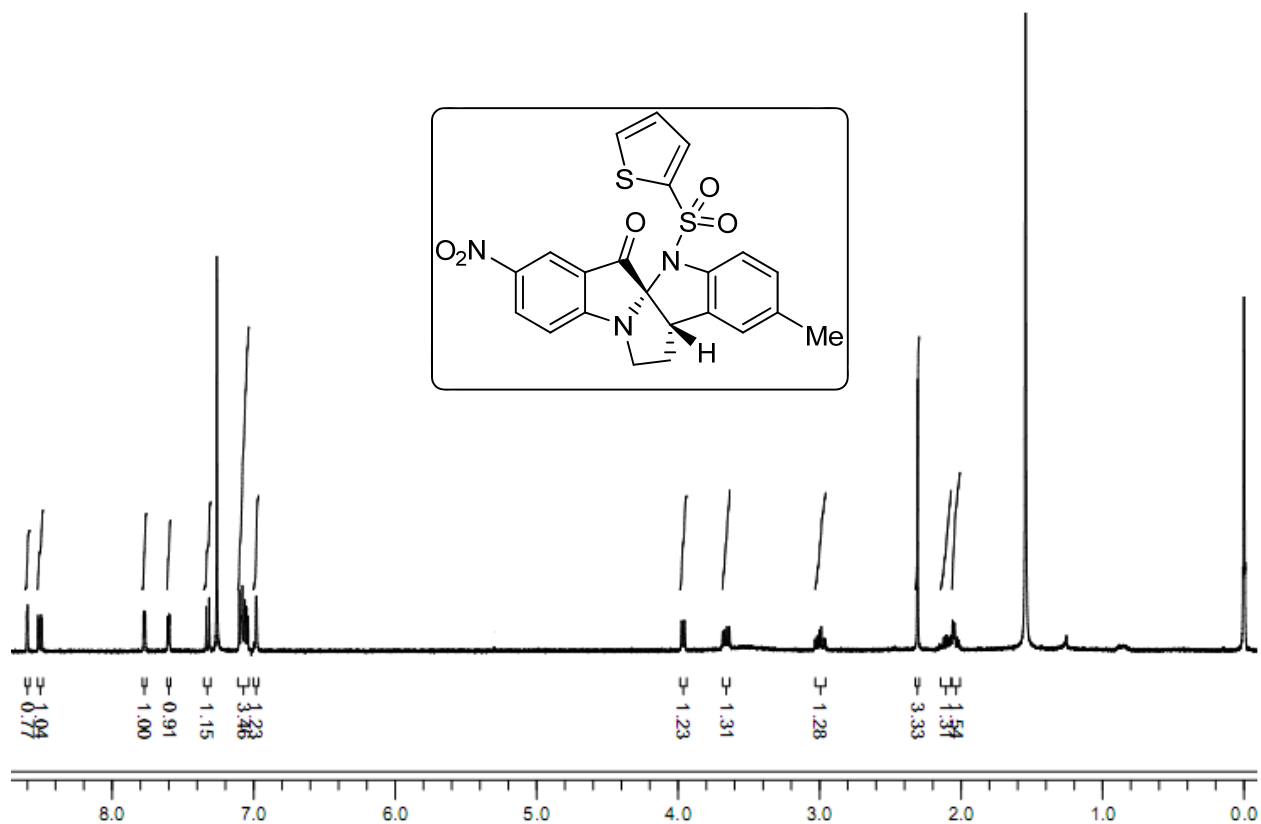

$^1\text{H}$  NMR (Varian, 400 MHz) spectrum of compound **2q** in  $\text{CDCl}_3$

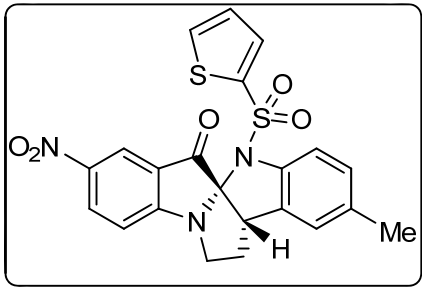

<sup>13</sup>C NMR spectrum (Varian, 100 MHz) of compound **2q** in CDCl<sub>3</sub>

|             |              |               |                       |               |              |                 |              |
|-------------|--------------|---------------|-----------------------|---------------|--------------|-----------------|--------------|
| Sample Name | LS-BPS-3-178 | Position      | Vial 3                | Sample type   |              | Instrument Name | Instrument 1 |
| User Name   |              | Inj Vol       | 0.5                   | Data Filename | 300514M003.d | ACQ Method      | test.m       |
| AR NO :     | MM14E040     | Acquired Time | 5/30/2014 10:37:48 AM |               |              |                 |              |

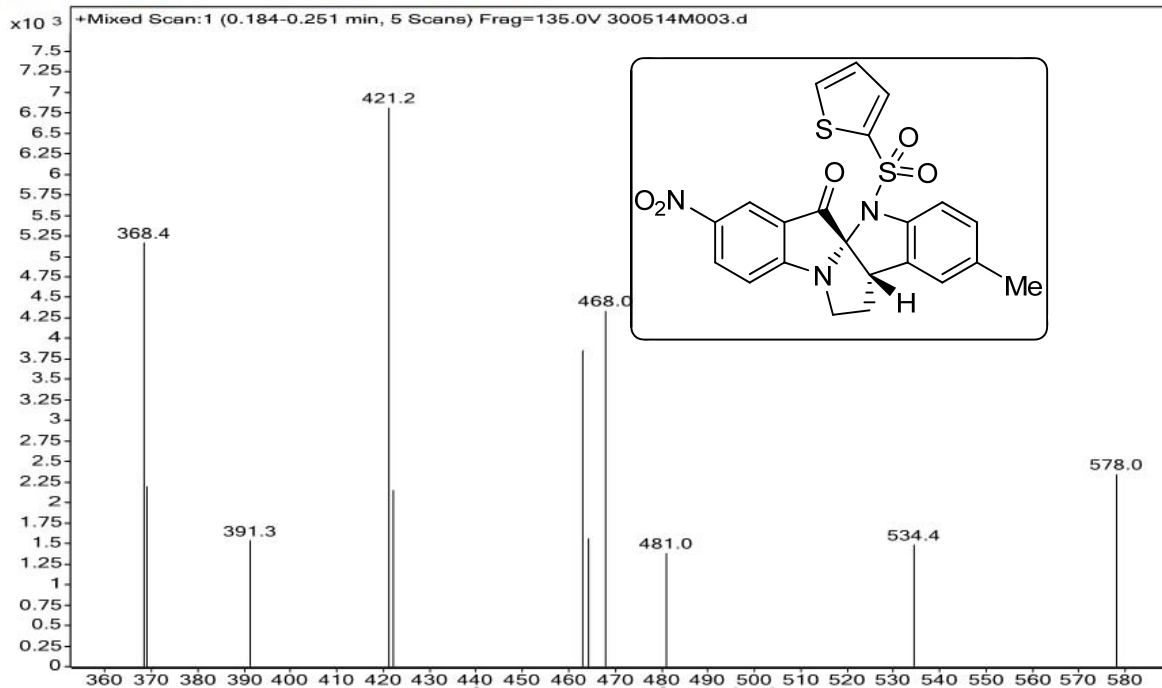

Mass spectra of compound **2q**

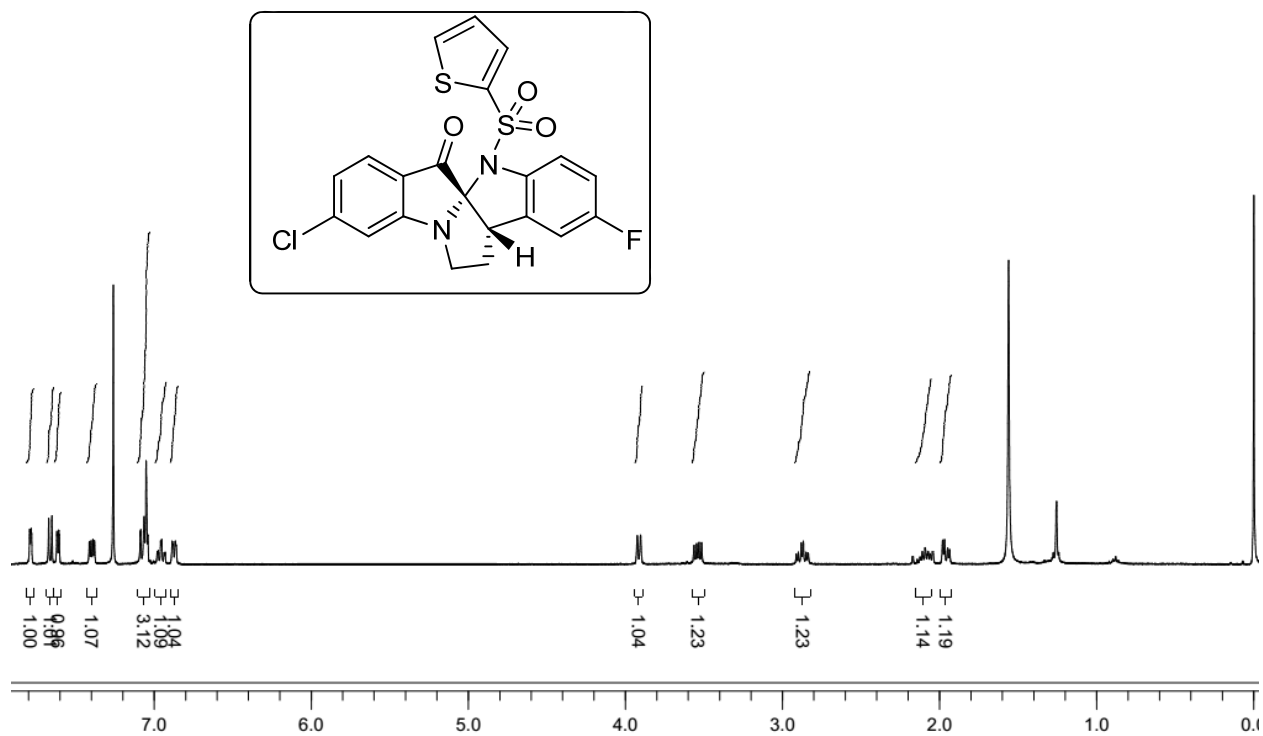

$^1\text{H}$  NMR (Varian, 400 MHz) spectrum of compound **2r** in  $\text{CDCl}_3$

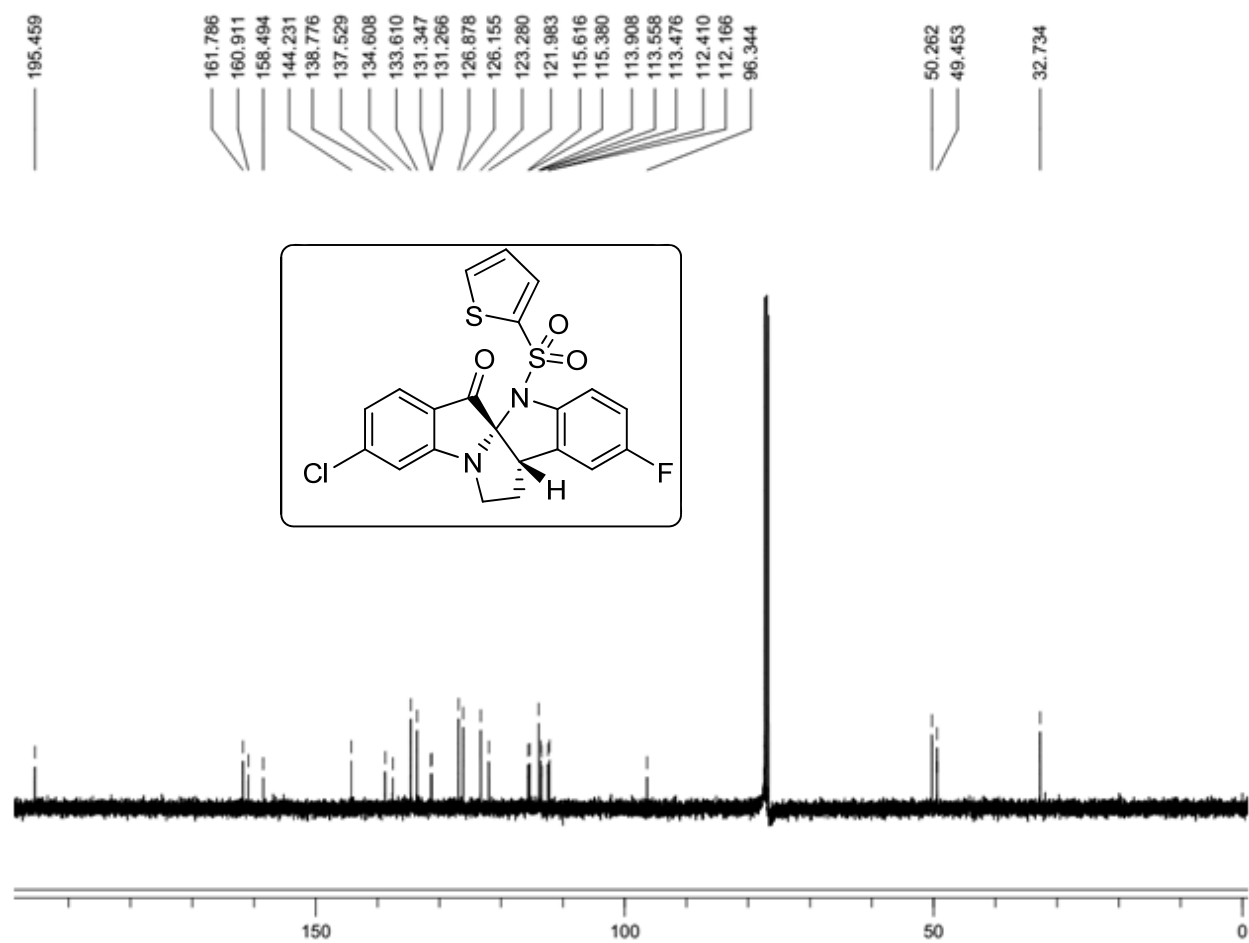

$^{13}\text{C}$  NMR spectrum (Varian, 100 MHz) of compound **2r** in  $\text{CDCl}_3$



# HPLC of compound 2r

CPRI @ DRILS  
HPLC ANALYSIS REPORT

Inj Date : Mon, 27. Oct. 2014 Acq Operator: RADHA  
Sample Name : ILS-BPS-3-193 Vial 42  
A R Number : CM14J011 ->Inj. Vol. : 7µL  
Acq. Method : D:\chem32\1\DATA\271014-API 2014-10-27 16-03-20\API ->  
Analysis Method : D:\CHEM32\_002\1\METHODS\API DTV.M  
Method Info : Column: X-Terra C-18 250\*4.6mm, 5µm  
Mobile phase: A) 5mm Ammonium Acetate in water B) ACN  
T/%B:0/20,3/20,12/95,23/95,25/20,30/20  
Flow:1.0ml/min Diluent: ACN:Water(80:20)

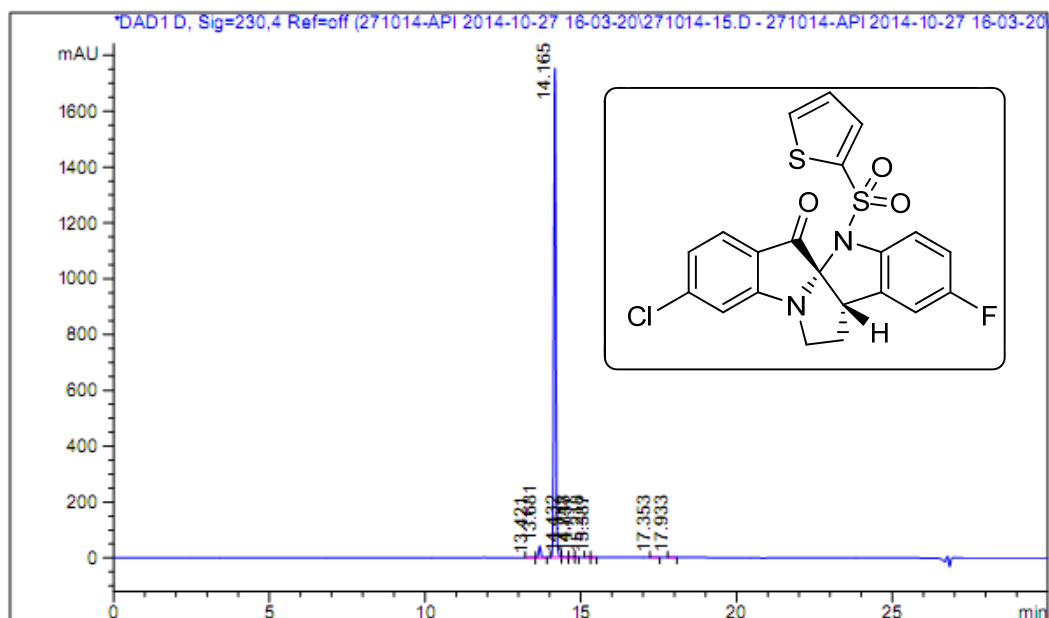

Signal 1: DAD1 D, Sig=230,4 Ref=off

| Peak # | RT [min] | Area     | Area % |
|--------|----------|----------|--------|
| 1      | 13.421   | 6.645    | 0.082  |
| 2      | 13.681   | 198.157  | 2.453  |
| 3      | 14.165   | 7816.338 | 96.774 |
| 4      | 14.432   | 14.074   | 0.174  |
| 5      | 14.748   | 11.102   | 0.137  |
| 6      | 14.837   | 3.966    | 0.049  |
| 7      | 15.218   | 8.604    | 0.107  |
| 8      | 15.387   | 3.310    | 0.041  |
| 9      | 17.353   | 8.452    | 0.105  |
| 10     | 17.933   | 6.223    | 0.077  |

Analysed by :

Checked by :

|             |              |               |                       |               |              |                 |              |
|-------------|--------------|---------------|-----------------------|---------------|--------------|-----------------|--------------|
| Sample Name | LS-BPS-3-193 | Position      | Vial 56               | Sample type   |              | Instrument Name | Instrument 1 |
| User Name   |              | Inj Vol       | 0.5                   | Data Filename | 161014M019.d | ACQ Method      | test.m       |
| AR NO :     | MM14J020     | Acquired Time | 10/16/2014 5:51:27 PM |               |              |                 |              |

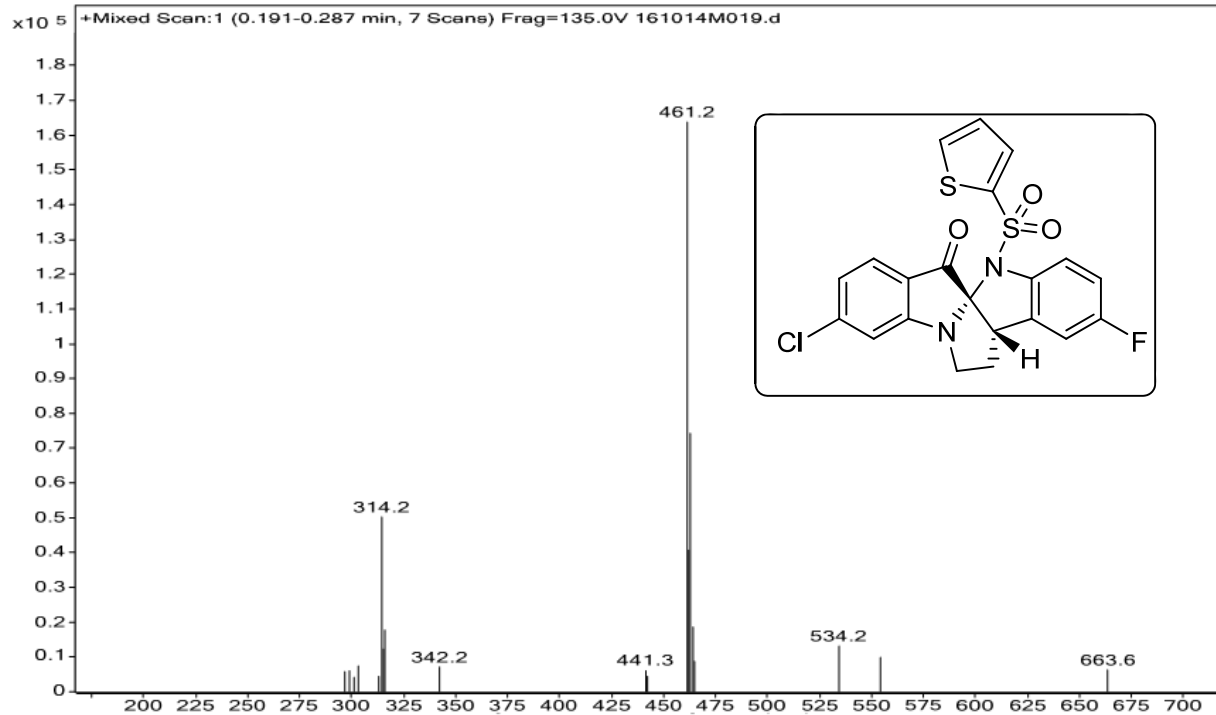

Mass spectra of compound **2r**

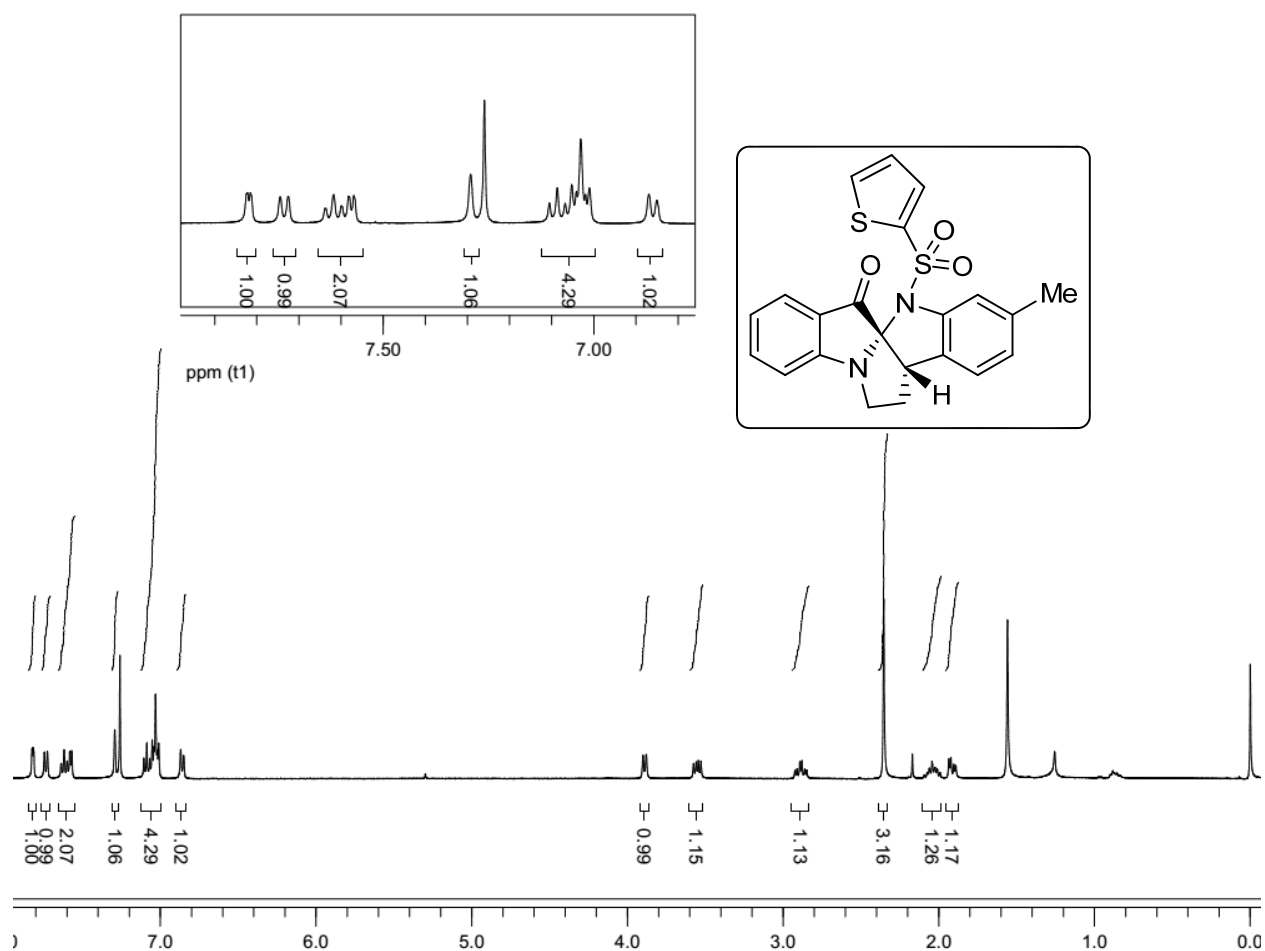

$^1\text{H}$  NMR (Varian, 400 MHz) spectrum of compound **2s** in  $\text{CDCl}_3$

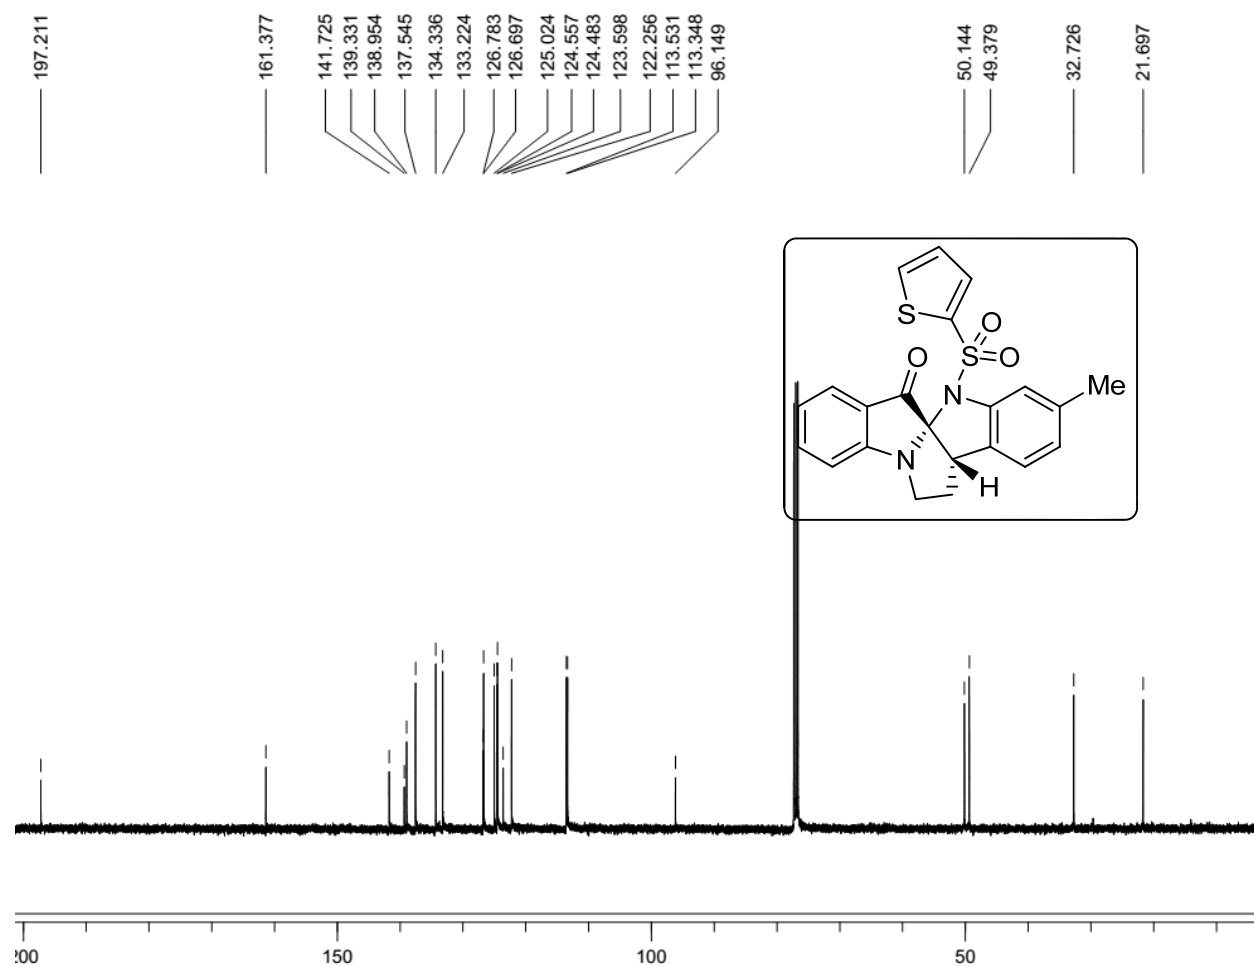

$^{13}\text{C}$  NMR spectrum (Varian, 100 MHz) of compound **2s** in  $\text{CDCl}_3$

# HPLC of compound 2p

CPRI @ DRILS  
HPLC ANALYSIS REPORT

Inj Date : Mon, 3. Nov. 2014 Acq Operator: RADHA  
Sample Name : ILS-BPS-3-199 Vial 14  
A R Number : CM14J023 ->Inj. Vol. : 5µL  
Acq. Method : D:\chem32\1\DATA\031114-API 2014-11-03 17-26-44\API ->  
Analysis Method : D:\CHEM32\_002\1\METHODS\API DTV.M  
Method Info : Column: X-Terra C-18 250\*4.6mm, 5µm  
Mobile phase: A) 5mm Ammonium Acetate in water B) ACN  
T/%B:0/20,3/20,12/95,23/95,25/20,30/20  
Flow:1.0ml/min Diluent: ACN:Water(80:20)

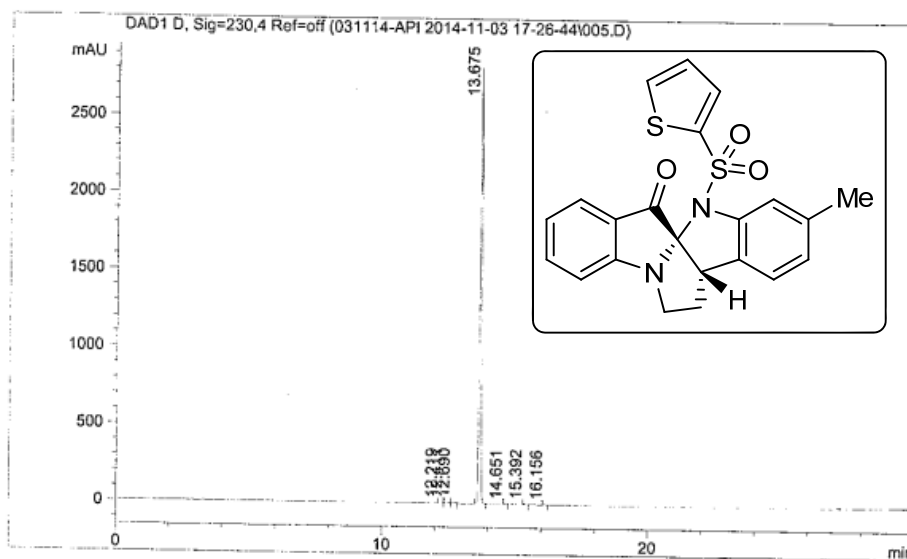

Signal 1: DAD1 D, Sig=230,4 Ref=off

| Peak # | RT [min] | Area      | Area % |
|--------|----------|-----------|--------|
| 1      | 12.219   | 43.381    | 0.313  |
| 2      | 12.411   | 37.158    | 0.268  |
| 3      | 12.690   | 42.332    | 0.305  |
| 4      | 13.675   | 13688.322 | 98.694 |
| 5      | 14.651   | 13.987    | 0.101  |
| 6      | 15.392   | 20.441    | 0.147  |
| 7      | 16.156   | 23.829    | 0.172  |

Analysed by : *[Signature]*  
3/1/14

Checked by :

|             |              |               |                      |               |              |                 |              |
|-------------|--------------|---------------|----------------------|---------------|--------------|-----------------|--------------|
| Sample Name | LS-BPS-3-199 | Position      | Vial 23              | Sample type   |              | Instrument Name | Instrument 1 |
| User Name   |              | Inj Vol       | 0.5                  | Data Filename | 031114M024.d | ACQ Method      | test.m       |
| AR NO :     | MM14K007     | Acquired Time | 11/3/2014 4:50:04 PM |               |              |                 |              |

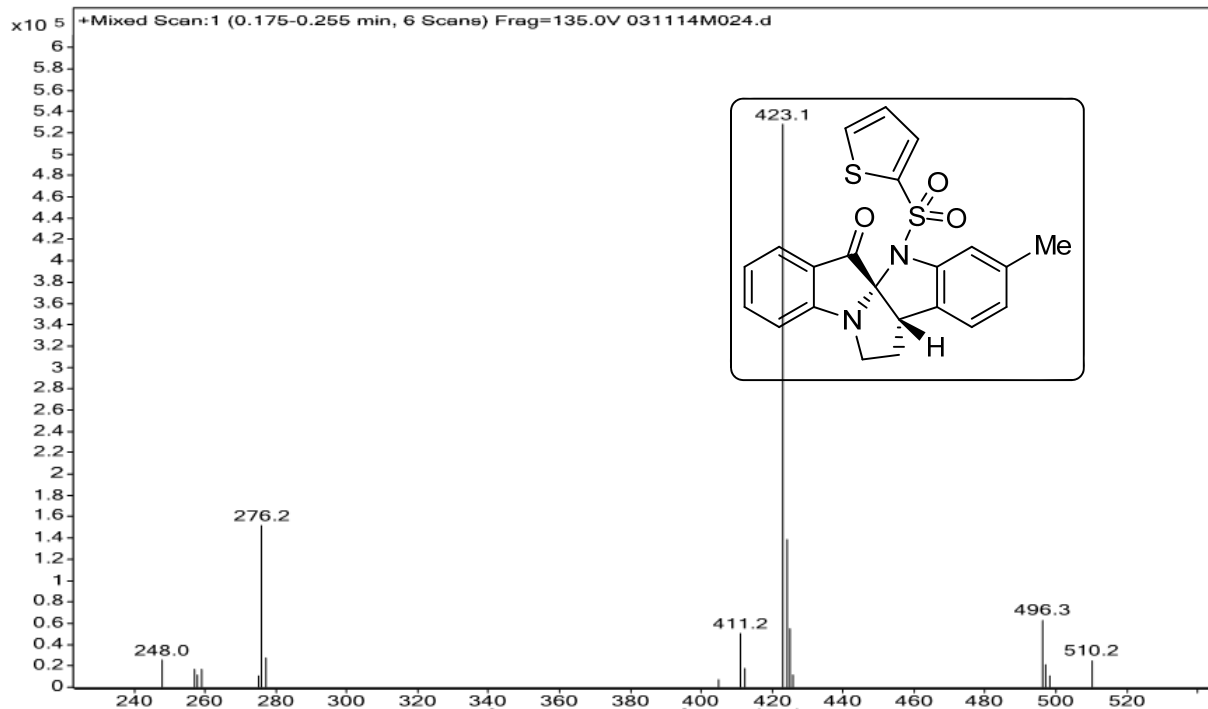

Mass spectra of compound **2s**

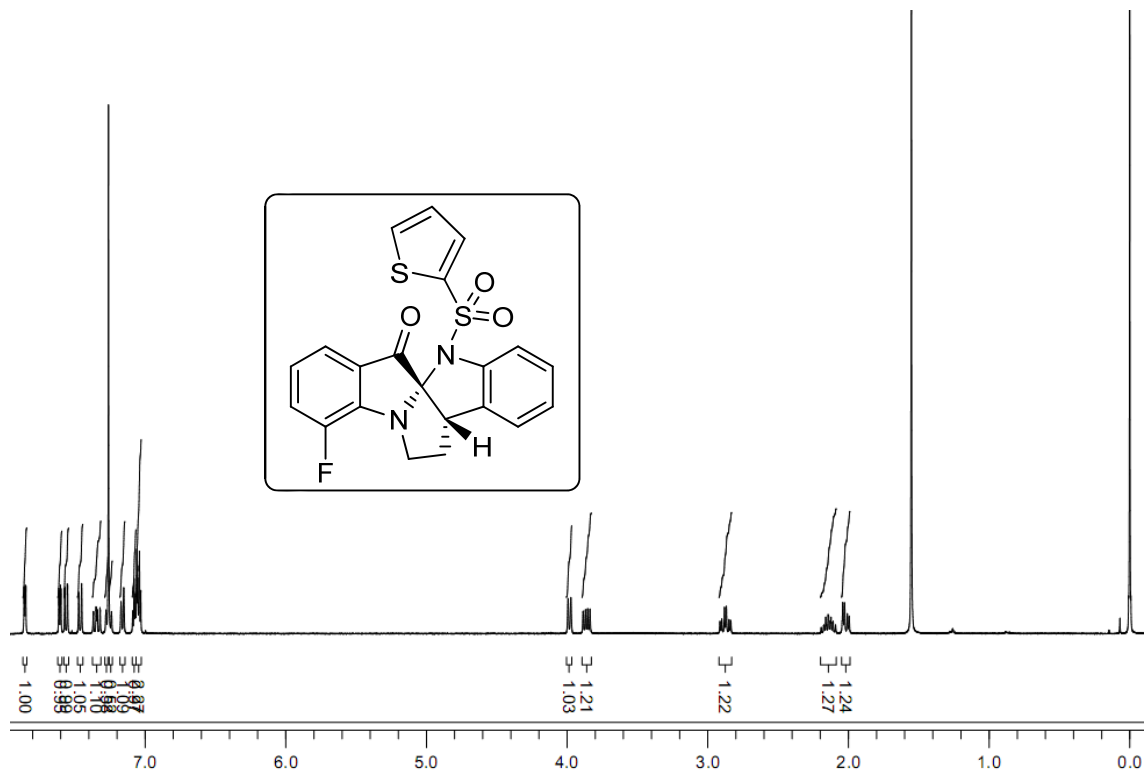

<sup>1</sup>H NMR (Varian, 400 MHz) spectrum of compound **2t** in CDCl<sub>3</sub>

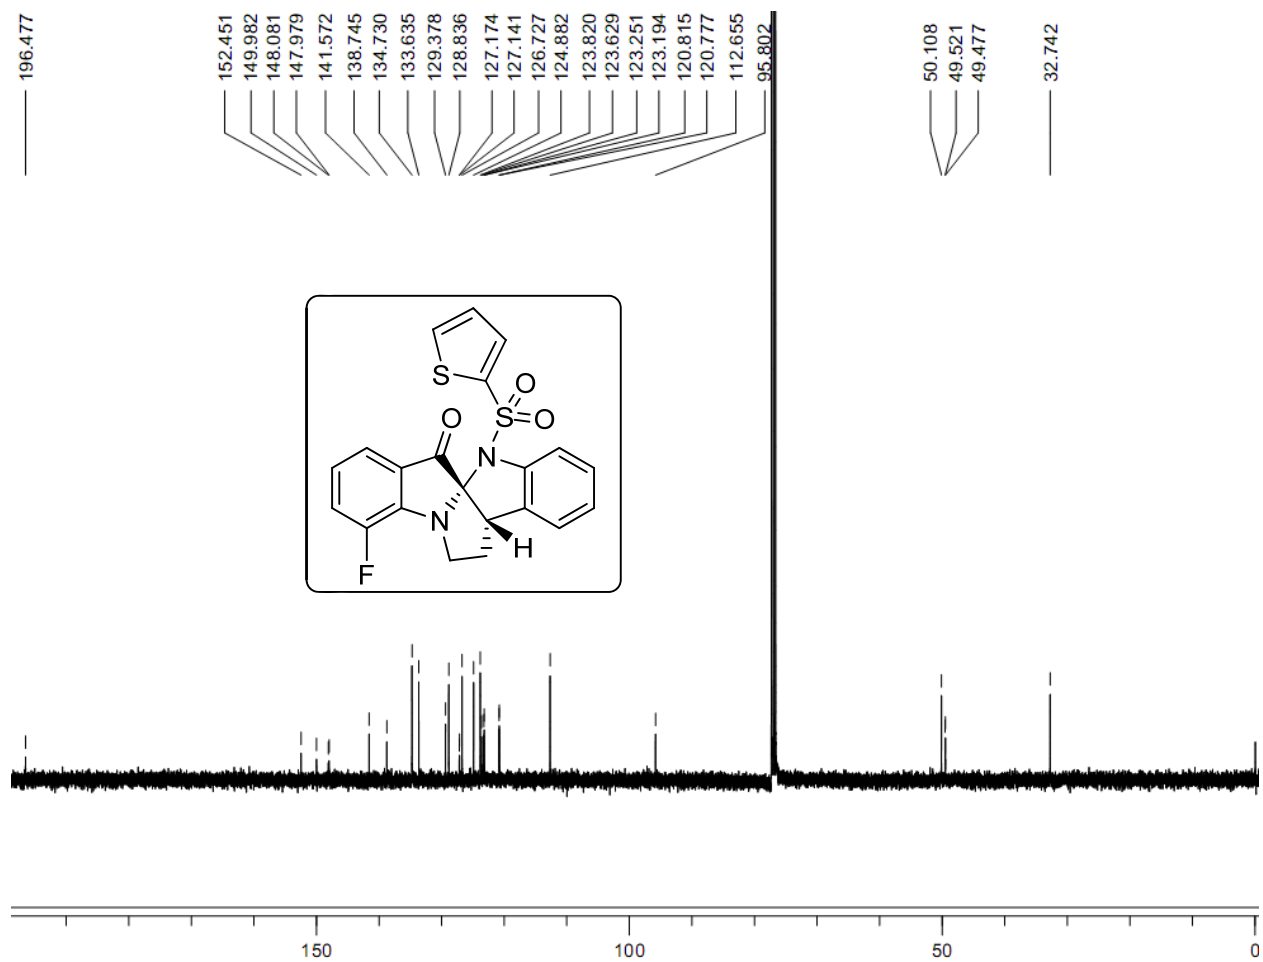

<sup>13</sup>C NMR spectrum (Varian, 100 MHz) of compound **2t** in CDCl<sub>3</sub>

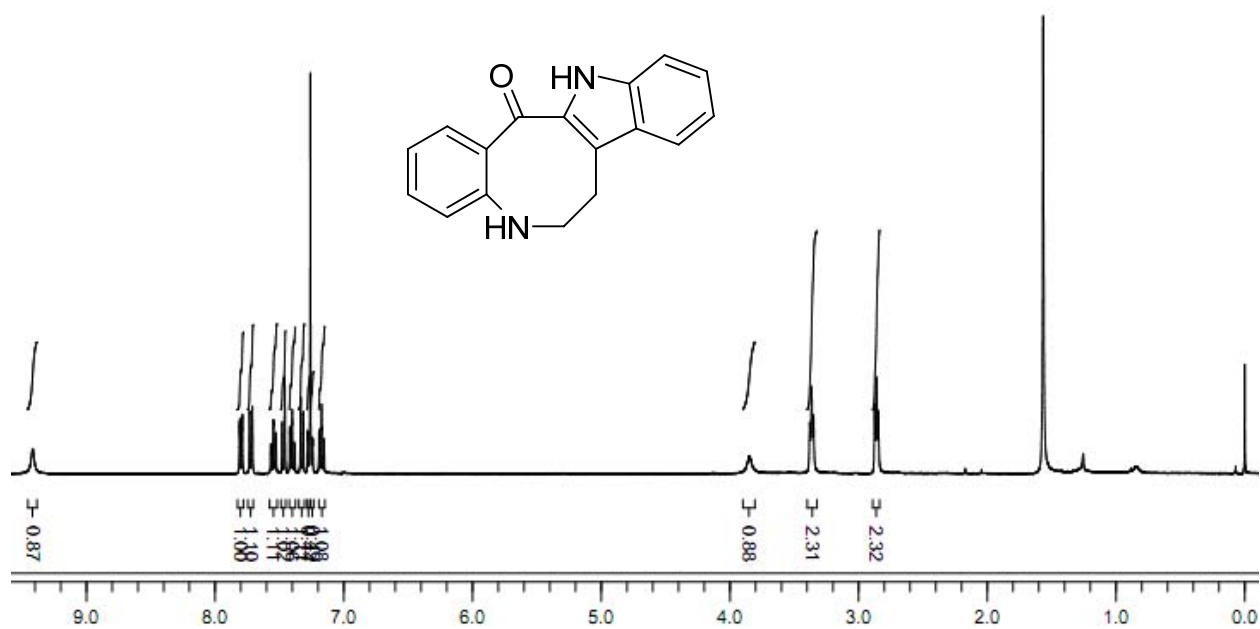

$^1\text{H}$  NMR (Varian, 400 MHz) spectrum of compound **3** in  $\text{CDCl}_3$



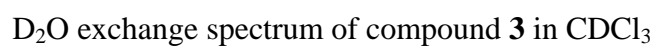D<sub>2</sub>O exchange spectrum of compound **3** in CDCl<sub>3</sub>

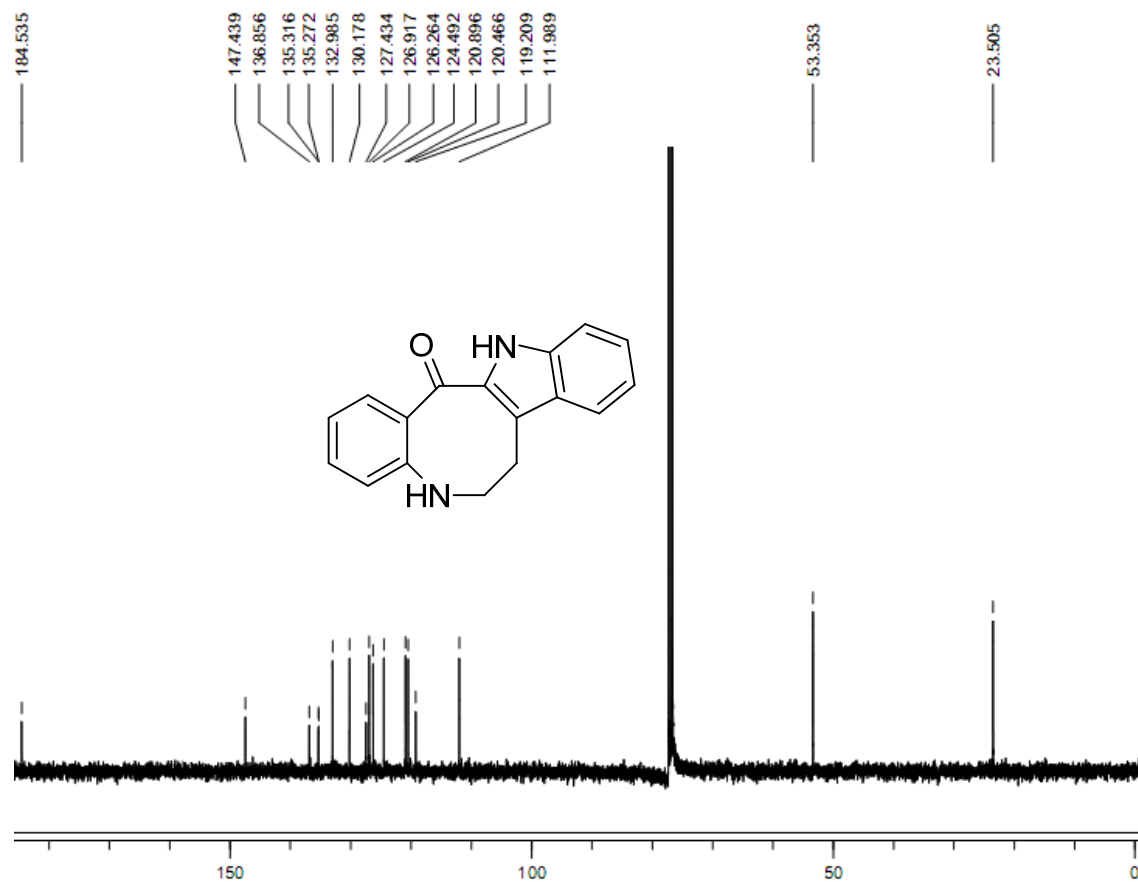

<sup>13</sup>C NMR spectrum (Varian, 100 MHz) of compound 3 in CDCl<sub>3</sub>

ILS-BPS-3-181 in CDCl<sub>3</sub>  
 DEPT EXPT.  
 A.R.NO: NM14E158  
 Sample Name:  
 Data Collected on:  
 DRILS-vnmr400  
 Archive directory:  
 Sample directory:  
 FidFile: DEPT  
 Pulse Sequence: DEPT  
 Solvent: cdcl3  
 Data collected on: Jun 5 2014

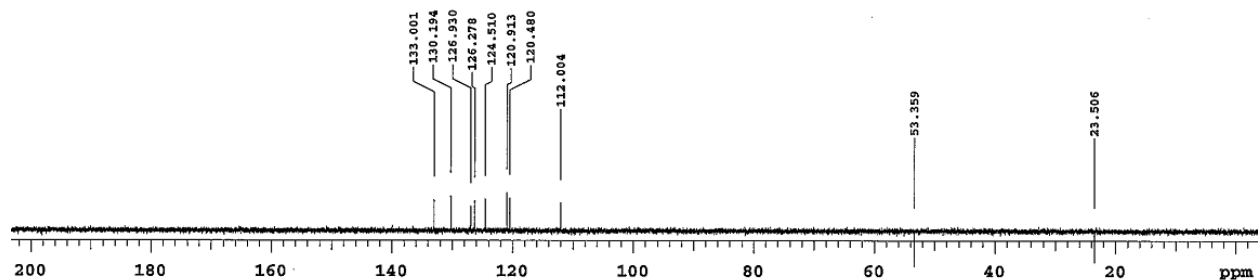

DEPT of compound 3

ILS-BPS-3-181 in CDCl3  
gCOSY EXPT.  
A.R.NO: NM14E155

Sample Name:

Data Collected on:

DNILS-vnmr400

Archive directory:

Sample directory:

FidFile: NM14E155\_ILS-BPS-3-181\_gCOSY

Pulse Sequence: gCOSY

Solvent: cdcl3

Data collected on: Jun 4 2014

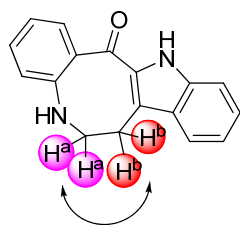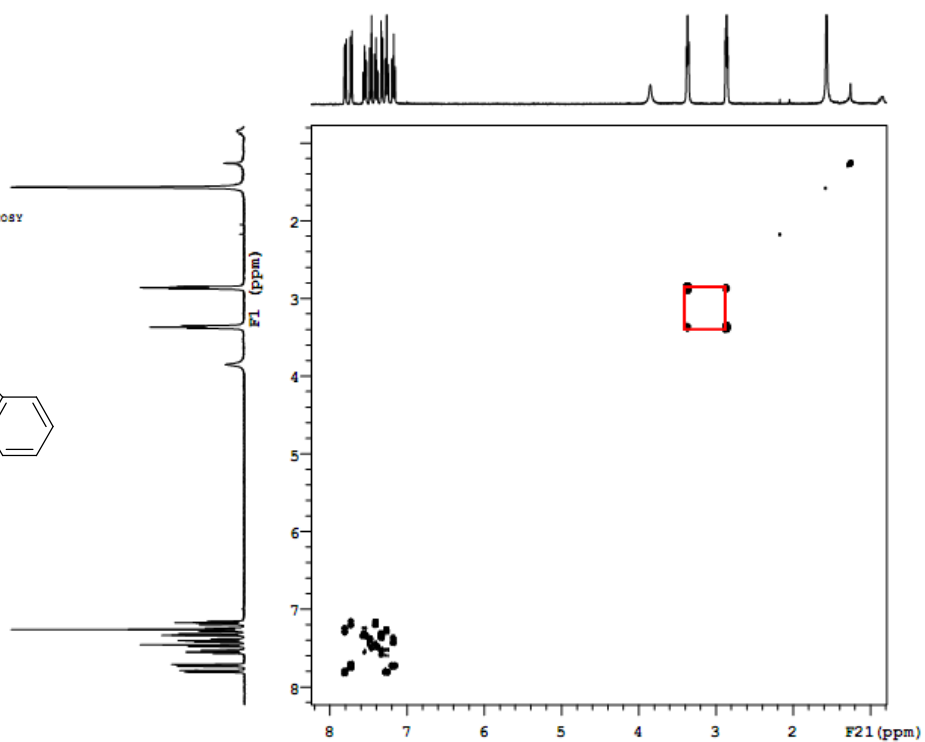

$^1\text{H}$ - $^1\text{H}$  COSY of compound **3**

# HPLC of compound 3

CPRI @ DRILS  
HPLC ANALYSIS REPORT

Inj Date : Thu, 29. May. 2014 Acq Operator: SHASHIDHAR  
Sample Name : ILS-BPS-3-181 Vial 26  
A.R Number : CM14E013 ->Inj. Vol. : 5µL  
Acq. Method : D:\chem32\1\DATA\280514-API 2 2014-05-28 18-08-54\AP->  
Analysis Method : D:\CHEM32\_002\1\METHODS\API DTV.M  
Method Info : Column: X-Terra C-18 250\*4.6mm, 5µm  
Mobile phase: A) 5mm Ammonium Acetate in water B) ACN  
T/%B:0/20,3/20,12/95,23/95,25/20,30/20  
Flow:1.0ml/min Diluent: ACN:WATER(50:50)

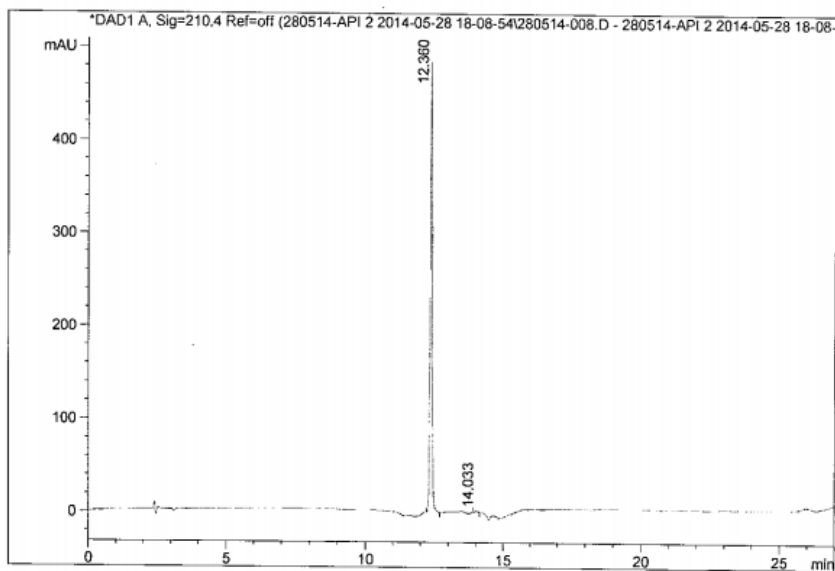

Signal 1: DAD1 A, Sig=210,4 Ref=off

| Peak # | RT [min] | Area     | Area % |
|--------|----------|----------|--------|
| 1      | 12.360   | 2463.916 | 99.526 |
| 2      | 14.033   | 11.723   | 0.474  |

Analysed by : *29/5/14*

Checked by : *pc 29/5/14*

|             |                 |               |                       |               |              |                 |              |
|-------------|-----------------|---------------|-----------------------|---------------|--------------|-----------------|--------------|
| Sample Name | ILS-3PS-3-181-P | Position      | Vial 25               | Sample type   |              | Instrument Name | Instrument 1 |
| User Name   |                 | Inj Vol       | 0.5                   | Data Filename | 280514M012.d | ACQ Method      | test.m       |
| AR NO:      | MM14E032        | Acquired Time | 5/28/2014 11:53:58 AM |               |              |                 |              |

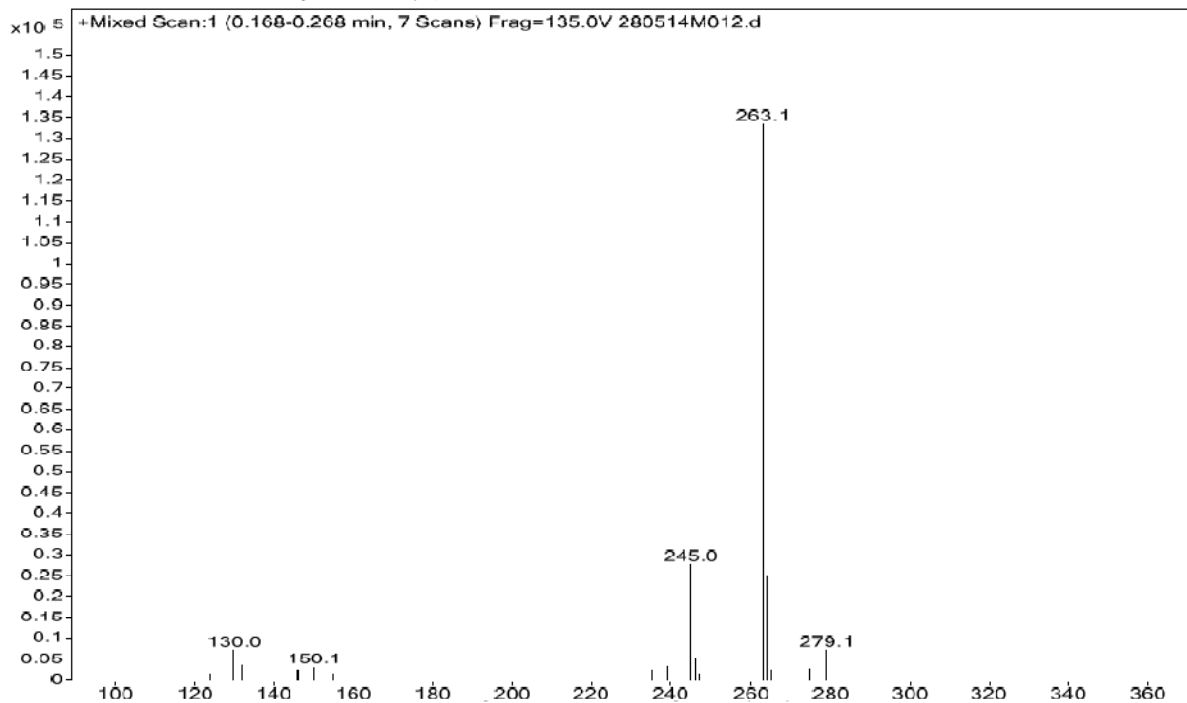

Mass spectra of compound 3

## Chiral HPLC

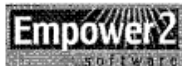

COSMIC@ILS

### SAMPLE INFORMATION

|                   |                          |                     |                 |
|-------------------|--------------------------|---------------------|-----------------|
| Sample Name:      | ILS-BPS-2-173            | Acquired By:        | System          |
| Sample Type:      | Unknown                  | Sample Set Name:    | 081112          |
| Vial:             | 1                        | Acq. Method Set:    | ILS             |
| Injection #:      | 1                        | Processing Method:  | chiral          |
| Injection Volume: | 10.00 ul                 | Channel Name:       | W2489 ChA       |
| Run Time:         | 30.0 Minutes             | Proc. Chnl. Descr.: | W2489 ChA 235nm |
| Date Acquired:    | 11/8/2012 4:06:56 PM IST |                     |                 |
| Date Processed:   | 11/8/2012 4:37:04 PM IST |                     |                 |

Column: Chiralpak IA-3 150\*4.6mm 3µm  
Mobile phase: n-Hexane:Ethanol (90:10)  
Flow: 1.0mL/min  
Diluent: Ethanol:n-Hexane(30:70)

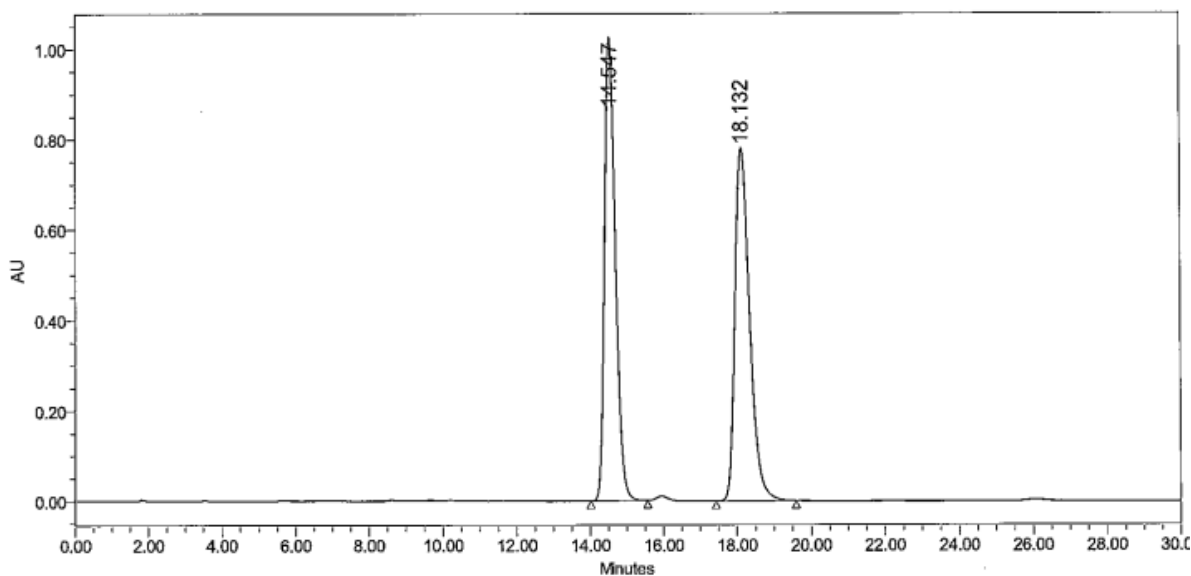

|   | RT     | Area     | % Area | Height  |
|---|--------|----------|--------|---------|
| 1 | 14.547 | 21148926 | 49.55  | 1027100 |
| 2 | 18.132 | 21534405 | 50.45  | 781144  |

Analysed By:

Reported by User: System  
Report Method: COSMIC@ILS  
Report Method ID 1885  
Page: 1 of 1

Project Name: 02\_NOVEMBER\_2012  
Date Printed:  
11/8/2012  
4:39:45 PM Asia/Calcutta

**SAMPLE INFORMATION**

|                   |                          |                     |                 |
|-------------------|--------------------------|---------------------|-----------------|
| Sample Name:      | ILS-BPS-3-62             | Analyst:            | Varma           |
| A.R.Number:       | CM14G009                 | Sample Set Name:    | 040714          |
| Vial:             | 9                        | Acq. Method Set:    | CHIRAL          |
| Injection #:      | 1                        | Processing Method:  | chiral1         |
| Injection Volume: | 10.00 ul                 | Proc. Chnl. Descr.: | W2489 ChB 220nm |
| Run Time:         | 35.0 Minutes             |                     |                 |
| Date Acquired:    | 7/4/2014 6:33:34 PM IST  |                     |                 |
| Date Processed:   | 7/7/2014 10:49:46 AM IST |                     |                 |

Column: Chiralpak IA-3, 150x4.6mm,3µm  
Mobile phase: n-Hexane:Ethanol (80:20)  
Flow: 1.0mL/min; Diluent:Mobile Phase.

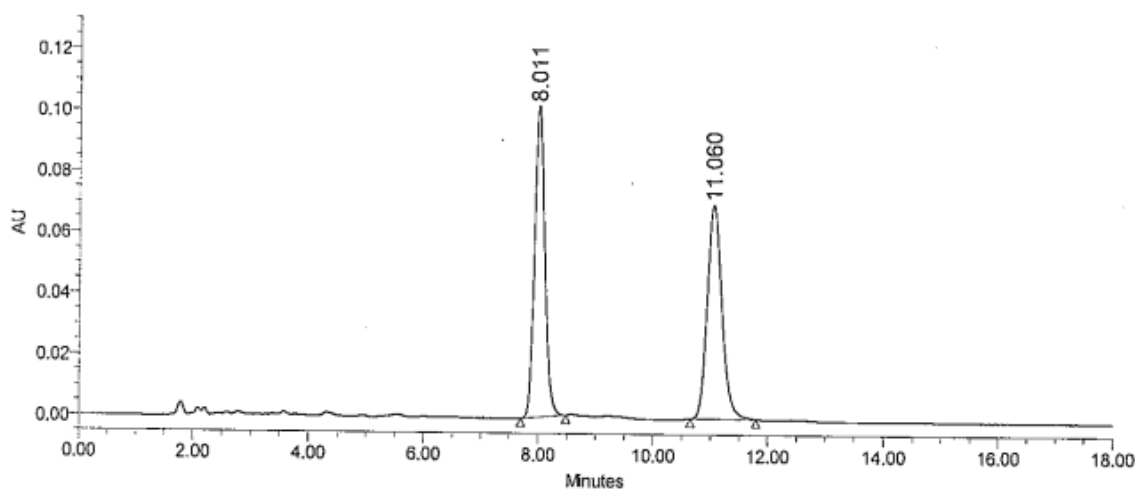

|   | RT     | Area    | % Area | Height |
|---|--------|---------|--------|--------|
| 1 | 8.011  | 1257339 | 50.00  | 102222 |
| 2 | 11.060 | 1257477 | 50.00  | 70135  |

Analysed By:

*[Signature]*  
7/7/14
