# Supplementary figures and images for: Creation of molecular complexities via a new Cu-catalyzed cascade reaction: a direct access to novel 2,2′-spirobiindole derivatives
Source: Royal Society of Chemistry journal article supplement (doi:10.1039/c4cc08911a), 2014-11-20

**Images of ball and stick model of intermediate E-4 and its conversion to the product 2**

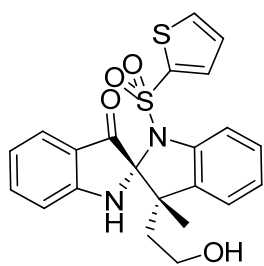

**E-4**

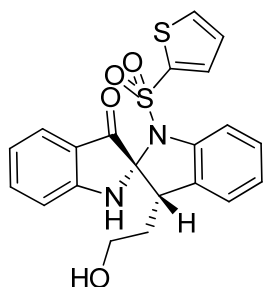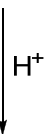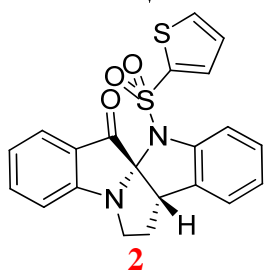

**2**

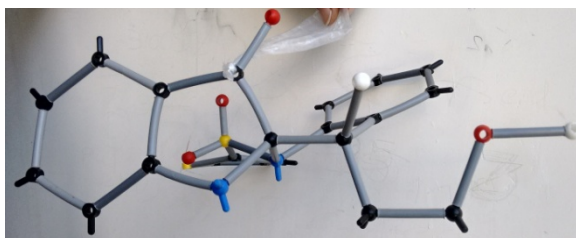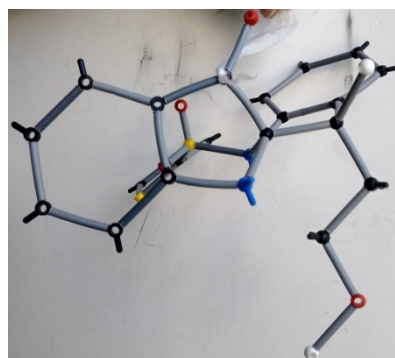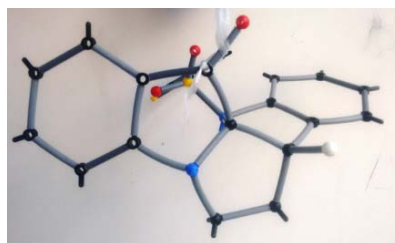

Supplement: c4cc08911a2.pdf [file c4cc08911a2.pdf]
